# Supplementary material for: Antifungal and Antioomycete Activities of a Curcuma longa L. Hydroethanolic Extract Rich in Bisabolene Sesquiterpenoids
Source: MDPI journal article supplement (doi:10.3390/horticulturae10020124), 2024-01-27
Supplement: s1 [file s1]

# Antifungal and Antioomycete Activities of a *Curcuma longa* L. Hydroethanolic Extract Rich in Bisabolene Sesquiterpenoids

Adriana Cruz <sup>1,2</sup>, Eva Sánchez-Hernández <sup>3,\*</sup>, Ana Teixeira <sup>1,4</sup>, Pablo Martín-Ramos <sup>3</sup>, Ana Cunha <sup>1,2</sup>, Rui Oliveira <sup>1,2</sup>

<sup>1</sup> Department of Biology, School of Sciences, University of Minho, Campus de Gualtar, 4710-057 Braga, Portugal; cruzadriana73@gmail.com (A.C.); anaspereirarteixeira@gmail.com (A.T.); accunha@bio.uminho.pt (A.C.); ruipso@bio.uminho.pt (R.O.)

<sup>2</sup> Centre of Molecular and Environmental Biology (CBMA), University of Minho, Campus de Gualtar, 4710-057 Braga, Portugal

<sup>3</sup> Department of Agricultural and Forestry Engineering, ETSIIAA, Universidad de Valladolid, Avenida de Madrid 44, 34004 Palencia, Spain; pmr@uva.es

<sup>4</sup> Centre for Research and Technology of Agro-Environmental and Biological Sciences (CITAB), Inov4Agro, University of Trás-os-Montes and Alto Douro (UTAD), Quinta de Prados, 5000-801 Vila Real, Portugal

\* Correspondence: eva.sanchez.hernandez@uva.es

## SUPPLEMENTARY MATERIALS

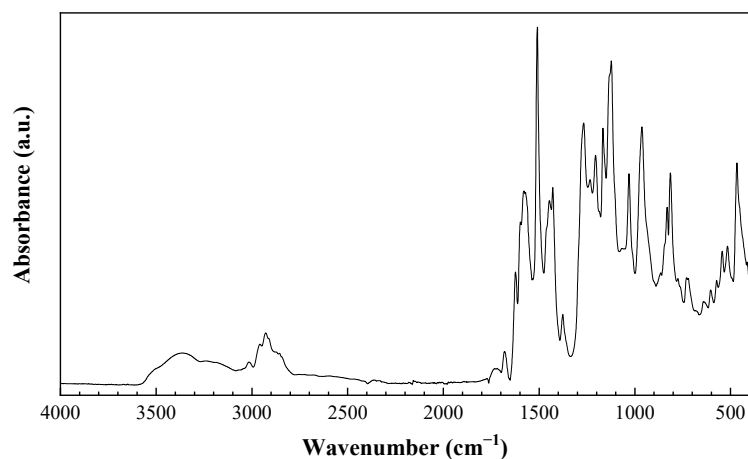

Figure S1. Infrared spectrum of the *C. longa* hydroethanolic extract.

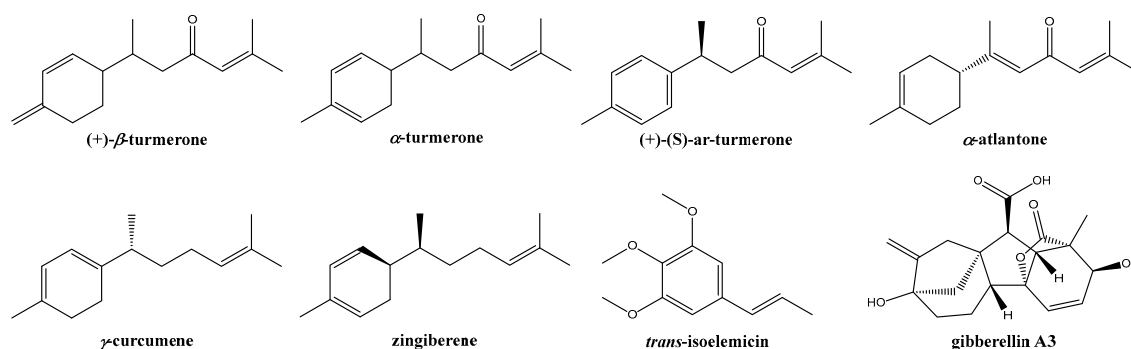

Figure S2. Chemical structures of phytochemicals identified in the hydroethanolic extract of *Curcuma longa* by GC-MS.

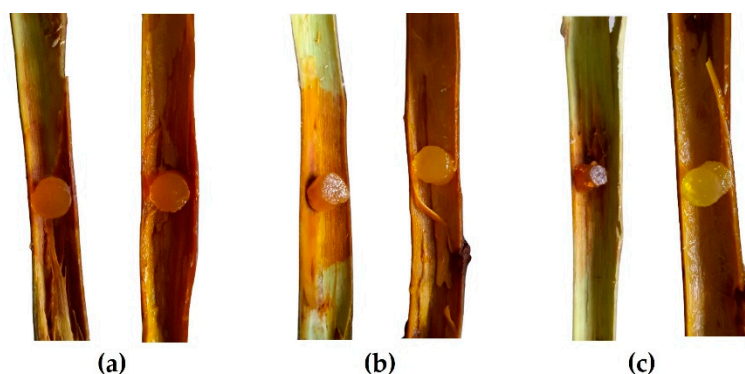

**Figure S3.** *Malus domestica* cv. (a) 'Golden', (b) 'Starking Delicious', and (c) 'Reinette' stem segments artificially inoculated with *P. cinnamomi* after 4 days of incubation: (left) untreated samples; (right) samples treated with *C. longa* hydroethanolic extract at a 3000  $\mu\text{g}\cdot\text{mL}^{-1}$  dose.

**Table S1.** Main bands in the infrared spectrum of the *Curcuma longa* hydroethanolic extract and their assignments.

| Wavenumber<br>( $\text{cm}^{-1}$ ) | Assignment                                                                                                                                  |
|------------------------------------|---------------------------------------------------------------------------------------------------------------------------------------------|
| 3362                               | O–H stretching                                                                                                                              |
| 2928                               | –CH <sub>2</sub> groups stretching                                                                                                          |
| 1680                               | C=O stretching                                                                                                                              |
| 1623                               | overlapping stretching of alkenes (C=C) and carbonyl (C=O)                                                                                  |
| 1578                               | COO <sup>–</sup> antisymmetric stretching                                                                                                   |
| 1509                               | C=O stretching; CC–C and CC=O in-plane bending; aromatic CC–H in-plane bending and vCC stretching aromatic of keto and enol configurations. |
| 1429                               | C=C aromatic stretching                                                                                                                     |
| 1376                               | methyl groups bending                                                                                                                       |
| 1267                               | v(C–O) phenolic bending                                                                                                                     |
| 1205                               | CH <sub>3</sub> symmetric deformation                                                                                                       |
| 1167                               | C=O stretching                                                                                                                              |
| 1123                               | C–H bending                                                                                                                                 |
| 1030                               | C–O vibrations                                                                                                                              |
| 963                                | C–H wag absorption (alkenyl)                                                                                                                |
| 832                                | C–H                                                                                                                                         |
| 814                                | out-of-plane ring bending                                                                                                                   |
| 730                                | – (CH <sub>2</sub> ) <sub>n</sub> – in-phase rocking                                                                                        |

**Table S2.** MS data for the hydroethanolic *C. longa* extract.

| Peak | RT<br>(min) | m/z, Abundance                                                                                                                                                                                                                                                                                                                                                                                                                                                                                                                                                                                                                                                                                                                                                                                                                                                                                                                                                                                                                                                                                                                                                                                                                                                                                                                                                                                                                                                                                                                                                                                                                                                                                                                                                                                                                                                                                                                                                           |
|------|-------------|--------------------------------------------------------------------------------------------------------------------------------------------------------------------------------------------------------------------------------------------------------------------------------------------------------------------------------------------------------------------------------------------------------------------------------------------------------------------------------------------------------------------------------------------------------------------------------------------------------------------------------------------------------------------------------------------------------------------------------------------------------------------------------------------------------------------------------------------------------------------------------------------------------------------------------------------------------------------------------------------------------------------------------------------------------------------------------------------------------------------------------------------------------------------------------------------------------------------------------------------------------------------------------------------------------------------------------------------------------------------------------------------------------------------------------------------------------------------------------------------------------------------------------------------------------------------------------------------------------------------------------------------------------------------------------------------------------------------------------------------------------------------------------------------------------------------------------------------------------------------------------------------------------------------------------------------------------------------------|
| 1    | 10.518      | 31.1, 354.0; 32.0, 766.0; 35.0, 360.0; 36.0, 1362.0; 38.0, 580.0; 39.0, 415.0; 41.0, 273.0; 43.0, 285.0; 44.0, 515.0; 44.9, 555.0; 50.0, 310.0; 51.0, 654.0; 52.0, 343.0; 53.0, 583.0; 55.0, 270.0; 58.0, 165.0; 58.9, 195.0; 60.9, 232.0; 62.0, 218.0; 63.0, 617.0; 64.0, 215.0; 64.9, 294.0; 67.0, 208.0; 68.0, 592.0; 68.9, 185.0; 73.1, 1282.0; 74.1, 333.0; 75.0, 834.0; 76.0, 221.0; 77.0, 3172.0; 78.1, 723.0; 79.0, 764.0; 80.1, 161.0; 80.9, 361.0; 89.0, 644.0; 91.0, 628.0; 97.0, 161.0; 102.9, 570.0; 104.9, 651.0; 106.0, 233.0; 107.1, 2543.0; 108.0, 290.0; 113.9, 230.0; 115.0, 918.0; 116.8, 458.0; 118.9, 693.0; 120.0, 183.0; 120.9, 472.0; 125.9, 574.0; 133.0, 7507.0; 134.0, 1138.0; 135.0, 9458.0; 136.0, 1113.0; 136.9, 195.0; 137.1, 204.0; 146.9, 426.0; 147.8, 154.0; 150.0, 8829.0; 151.0, 6675.0; 152.0, 814.0; 153.0, 588.0; 155.0, 174.0; 161.0, 242.0; 163.0, 274.0; 165.0, 174.0; 175.9, 1240.0; 177.0, 4289.0; 177.9, 813.0; 179.0, 532.0; 190.9, 459.0; 192.2, 464.0; 193.0, 1108.0; 193.9, 325.0; 194.9, 224.0; 207.0, 1054.0; 207.9, 290.0; 208.9, 290.0; 234.9, 460.0; 235.9, 170.0; 236.9, 257.0; 248.9, 150.0; 251.0, 858.0; 252.0, 246.0; 252.9, 590.0; 267.0, 4478.0; 268.0, 1119.0; 269.0, 769.0; 269.8, 161.0; 281.0, 414.0; 308.0, 455.0; 309.0, 1679.0; 310.0, 484.0; 311.0, 360.0; 325.0, 631.0; 326.0, 215.0; 327.0, 1872.0; 328.0, 567.0; 328.9, 313.0; 341.0, 714.0; 342.0, 251.0; 342.8, 243.0; 369.1, 169.0; 383.0, 469.0; 385.0, 382.0; 386.0, 158.0; 399.1, 714.0; 400.0, 278.0; 401.0, 499.0; 402.0, 175.0; 415.0, 1411.0; 416.0, 543.0; 417.0, 430.0; 457.0, 323.0; 498.1, 1168.0; 499.1, 2365.0; 500.1, 1320.0; 501.2, 788.0; 502.2, 248.0                                                                                                                                                                                                                                                                      |
|      |             | 31.1, 402.0; 31.9, 744.0; 35.0, 387.0; 36.0, 1366.0; 38.0, 556.0; 39.0, 428.0; 40.0, 177.0; 41.0, 519.0; 42.0, 159.0; 43.0, 374.0; 44.0, 373.0; 44.9, 487.0; 49.9, 230.0; 50.9, 559.0; 52.0, 216.0; 53.0, 249.0; 55.0, 826.0; 57.0, 183.0; 57.9, 183.0; 59.0, 204.0; 60.0, 353.0; 61.0, 259.0; 63.0, 289.0; 65.1, 546.0; 66.0, 198.0; 68.0, 499.0; 69.0, 303.0; 70.9, 206.0; 73.1, 1372.0; 74.0, 327.0; 75.0, 574.0; 76.0, 225.0; 77.1, 2179.0; 78.0, 562.0; 79.0, 505.0; 79.9, 150.0; 80.9, 474.0; 82.9, 164.0; 87.0, 153.0; 87.9, 155.0; 89.0, 437.0; 91.1, 1367.0; 92.0, 285.0; 93.0, 274.0; 94.0, 452.0; 94.9, 221.0; 97.0, 179.0; 101.9, 188.0; 103.0, 1772.0; 104.1, 1181.0; 104.9, 944.0; 106.0, 258.0; 107.0, 367.0; 113.9, 203.0; 114.9, 1013.0; 116.2, 209.0; 117.0, 503.0; 117.9, 168.0; 118.9, 844.0; 120.0, 276.0; 121.0, 1141.0; 122.1, 530.0; 125.9, 472.0; 129.1, 221.0; 131.1, 1470.0; 132.0, 532.0; 133.0, 7422.0; 134.0, 1319.0; 135.0, 3005.0; 136.0, 366.0; 137.0, 1088.0; 137.9, 194.0; 147.1, 841.0; 148.0, 236.0; 149.0, 2124.0; 150.1, 416.0; 151.0, 4699.0; 151.9, 730.0; 153.0, 449.0; 161.0, 249.0; 162.0, 334.0; 163.0, 478.0; 164.0, 6127.0; 165.1, 746.0; 165.9, 153.0; 175.9, 1137.0; 177.0, 4236.0; 178.0, 690.0; 178.9, 668.0; 191.0, 446.0; 191.9, 345.0; 192.9, 1266.0; 193.9, 229.0; 194.9, 207.0; 207.0, 1208.0; 208.0, 251.0; 209.0, 199.0; 222.9, 199.0; 234.9, 548.0; 236.9, 253.0; 250.9, 782.0; 252.0, 248.0; 252.9, 537.0; 267.0, 4199.0; 267.9, 1032.0; 269.0, 640.0; 270.0, 182.0; 280.9, 344.0; 308.0, 349.0; 309.0, 1406.0; 310.0, 379.0; 310.9, 290.0; 325.0, 548.0; 327.0, 1645.0; 327.9, 468.0; 328.9, 381.0; 331.0, 152.0; 341.0, 640.0; 342.0, 226.0; 342.9, 164.0; 369.1, 210.0; 383.0, 378.0; 384.9, 300.0; 399.0, 523.0; 399.9, 233.0; 401.0, 444.0; 415.1, 1116.0; 416.1, 438.0; 416.8, 240.0; 457.2, 161.0; 458.1, 165.0; 497.1, 157.0; 498.2, 947.0; 499.2, 2067.0; 500.1, 1002.0; 501.1, 633.0; 502.1, 244.0 |
| 3    | 11.390      | 31.1, 339.0; 32.1, 670.0; 35.1, 266.0; 36.0, 1360.0; 37.9, 502.0; 39.0, 1227.0; 40.1, 213.0; 41.0, 1130.0; 41.9, 500.0; 43.0, 5956.0; 44.0, 509.0; 45.0, 436.0; 49.9, 395.0; 51.0, 862.0; 52.0, 317.0; 53.0, 449.0; 55.0, 277.0; 57.1, 174.0; 58.0, 217.0; 59.0, 233.0; 61.0, 202.0; 62.0, 280.0; 63.0, 1128.0; 64.1, 459.0; 65.0, 1778.0; 66.0, 259.0; 67.0, 212.0; 68.0, 336.0; 68.9, 480.0; 71.0, 161.0; 73.0, 1030.0; 74.0, 356.0; 75.0, 645.0; 75.9, 326.0; 77.0, 3358.0; 78.0, 938.0; 79.0, 1115.0; 81.0, 343.0; 84.9, 244.0; 86.9, 252.0; 88.0, 183.0; 89.0, 1176.0; 90.1, 302.0; 91.1, 7415.0; 92.0, 1309.0; 93.0, 2304.0; 94.0, 275.0; 95.0, 188.0; 96.0, 160.0; 102.0, 649.0; 103.0, 1940.0; 104.1, 999.0; 105.1, 7481.0; 106.0, 632.0; 106.9, 421.0; 114.1, 337.0; 115.0, 4805.0; 116.1, 1352.0; 117.1, 6992.0; 118.1, 4123.0; 119.1, 34568.0; 120.1, 3479.0; 121.0, 715.0; 122.0, 181.0; 126.1, 471.0; 127.0, 477.0; 128.0, 1068.0; 129.1, 312.0; 131.0, 448.0; 133.0, 8709.0; 134.0, 1327.0; 135.0, 2950.0; 136.1, 365.0; 137.0, 265.0; 141.2, 192.0; 142.2, 205.0; 143.1, 2012.0; 144.0, 347.0; 145.0, 243.0; 145.8, 178.0; 146.3, 197.0; 147.0, 476.0; 151.0, 4325.0; 152.0, 646.0; 152.9, 386.0; 157.0, 179.0; 158.2, 585.0; 159.0, 259.0; 161.1, 15327.0; 162.1, 1762.0; 162.9, 285.0; 165.0, 218.0; 176.1, 14619.0; 177.0, 6296.0; 178.0, 982.0; 178.9, 582.0; 191.0, 449.0; 192.2, 402.0; 193.0, 933.0; 193.9, 173.0; 194.8, 152.0; 207.1, 981.0; 207.9, 206.0; 208.9, 239.0; 222.9, 204.0; 234.9, 436.0; 236.9, 234.0; 249.1, 157.0; 250.9, 741.0; 252.0, 199.0; 253.0, 578.0; 267.0, 3596.0; 268.0, 821.0; 269.0, 730.0; 270.0, 171.0; 281.1, 341.0; 308.0, 285.0; 309.0, 1095.0; 310.0, 350.0; 310.9, 230.0; 324.9, 380.0; 327.0, 1259.0; 327.8, 349.0; 328.8, 289.0; 331.0, 170.0; 340.9, 696.0; 342.0, 157.0; 342.9,                                                                                                                             |
|      |             |                                                                                                                                                                                                                                                                                                                                                                                                                                                                                                                                                                                                                                                                                                                                                                                                                                                                                                                                                                                                                                                                                                                                                                                                                                                                                                                                                                                                                                                                                                                                                                                                                                                                                                                                                                                                                                                                                                                                                                          |

|   |        |                                                                                                                                                                                                                                                                                                                                                                                                                                                                                                                                                                                                                                                                                                                                                                                                                                                                                                                                                                                                                                                                                                                                                                                                                                                                                                                                                                                                                                                                                                                                                                                                                                                                                                                                                                                                                                                                                                                                           |
|---|--------|-------------------------------------------------------------------------------------------------------------------------------------------------------------------------------------------------------------------------------------------------------------------------------------------------------------------------------------------------------------------------------------------------------------------------------------------------------------------------------------------------------------------------------------------------------------------------------------------------------------------------------------------------------------------------------------------------------------------------------------------------------------------------------------------------------------------------------------------------------------------------------------------------------------------------------------------------------------------------------------------------------------------------------------------------------------------------------------------------------------------------------------------------------------------------------------------------------------------------------------------------------------------------------------------------------------------------------------------------------------------------------------------------------------------------------------------------------------------------------------------------------------------------------------------------------------------------------------------------------------------------------------------------------------------------------------------------------------------------------------------------------------------------------------------------------------------------------------------------------------------------------------------------------------------------------------------|
|   |        | 172.0; 369.0, 171.0; 382.9, 309.0; 384.9, 437.0; 399.1, 402.0; 399.9, 230.0; 400.9, 190.0; 415.1, 902.0; 416.2, 410.0; 417.0, 270.0; 456.9, 176.0; 498.2, 622.0; 499.2, 1813.0; 500.1, 806.0; 501.1, 550.0                                                                                                                                                                                                                                                                                                                                                                                                                                                                                                                                                                                                                                                                                                                                                                                                                                                                                                                                                                                                                                                                                                                                                                                                                                                                                                                                                                                                                                                                                                                                                                                                                                                                                                                                |
| 4 | 11.717 | 31.1, 268.0; 32.1, 641.0; 34.9, 303.0; 36.0, 1275.0; 37.0, 172.0; 38.0, 495.0; 39.0, 1012.0; 40.0, 236.0; 41.0, 1135.0; 42.1, 365.0; 43.1, 3541.0; 43.9, 430.0; 45.1, 374.0; 50.0, 251.0; 51.0, 418.0; 52.0, 297.0; 53.0, 667.0; 54.0, 194.0; 55.0, 560.0; 56.1, 163.0; 57.0, 301.0; 57.9, 195.0; 59.0, 152.0; 61.0, 174.0; 62.1, 156.0; 63.0, 342.0; 65.0, 1084.0; 66.0, 255.0; 67.0, 615.0; 67.9, 496.0; 69.1, 623.0; 70.0, 210.0; 71.1, 295.0; 73.0, 758.0; 74.0, 216.0; 75.1, 459.0; 76.0, 288.0; 77.0, 4447.0; 78.0, 1254.0; 79.0, 2083.0; 79.9, 366.0; 81.1, 720.0; 82.0, 231.0; 83.9, 190.0; 84.2, 169.0; 85.0, 257.0; 86.9, 216.0; 89.0, 439.0; 91.1, 6690.0; 92.1, 3123.0; 93.1, 4303.0; 94.0, 474.0; 95.1, 215.0; 96.0, 177.0; 97.0, 174.0; 102.0, 162.0; 103.0, 616.0; 104.0, 350.0; 105.1, 6245.0; 106.0, 634.0; 107.0, 418.0; 107.9, 245.0; 109.1, 571.0; 110.1, 155.0; 115.0, 891.0; 116.9, 611.0; 118.0, 363.0; 119.1, 2427.0; 120.1, 21648.0; 121.1, 2827.0; 122.0, 380.0; 123.0, 440.0; 125.9, 349.0; 128.8, 163.0; 131.1, 191.0; 133.0, 5697.0; 134.0, 960.0; 135.0, 2761.0; 136.0, 468.0; 137.0, 419.0; 145.1, 297.0; 147.0, 475.0; 151.0, 5736.0; 152.0, 1924.0; 153.0, 598.0; 154.8, 167.0; 160.2, 168.0; 161.0, 495.0; 163.1, 201.0; 165.0, 266.0; 176.0, 1190.0; 177.0, 4320.0; 178.0, 928.0; 178.9, 619.0; 180.0, 220.0; 191.0, 453.0; 192.0, 316.0; 192.9, 916.0; 193.9, 202.0; 206.9, 1104.0; 208.0, 276.0; 209.0, 242.0; 234.9, 426.0; 251.0, 650.0; 251.9, 208.0; 253.0, 557.0; 254.0, 218.0; 267.0, 3045.0; 268.0, 737.0; 269.0, 682.0; 270.0, 161.0; 281.0, 347.0; 308.0, 273.0; 309.1, 1196.0; 309.9, 266.0; 310.9, 296.0; 324.9, 187.0; 327.0, 786.0; 327.9, 238.0; 328.7, 150.0; 330.8, 195.0; 340.9, 457.0; 341.9, 164.0; 343.1, 152.0; 384.9, 171.0; 399.0, 349.0; 401.0, 184.0; 415.1, 550.0; 415.9, 218.0; 417.0, 156.0; 498.1, 455.0; 499.1, 1147.0; 500.1, 443.0; 501.2, 250.0                     |
| 5 | 11.746 | 31.0, 315.0; 32.0, 789.0; 34.9, 290.0; 36.0, 1201.0; 37.9, 408.0; 39.0, 559.0; 40.1, 166.0; 41.0, 810.0; 42.1, 240.0; 43.1, 428.0; 44.0, 443.0; 44.9, 361.0; 49.9, 216.0; 51.0, 441.0; 52.0, 288.0; 53.0, 609.0; 55.0, 861.0; 56.0, 267.0; 58.9, 200.0; 61.0, 166.0; 63.1, 289.0; 65.0, 591.0; 66.0, 188.0; 67.0, 702.0; 68.0, 1458.0; 69.0, 413.0; 73.1, 770.0; 73.9, 248.0; 74.9, 445.0; 77.0, 2637.0; 78.0, 545.0; 79.1, 970.0; 79.9, 195.0; 81.0, 1007.0; 82.1, 248.0; 83.1, 226.0; 84.0, 202.0; 88.9, 350.0; 91.0, 2695.0; 92.1, 1338.0; 93.1, 3124.0; 94.0, 664.0; 95.1, 1118.0; 96.0, 188.0; 102.1, 182.0; 102.9, 872.0; 104.0, 328.0; 105.0, 2337.0; 105.9, 474.0; 107.0, 708.0; 108.0, 1145.0; 109.1, 394.0; 110.1, 349.0; 115.0, 942.0; 116.0, 205.0; 117.1, 757.0; 118.1, 260.0; 119.0, 2944.0; 120.0, 1203.0; 121.1, 1015.0; 122.0, 310.0; 122.9, 259.0; 126.0, 324.0; 127.0, 165.0; 128.0, 329.0; 128.9, 364.0; 131.0, 2069.0; 132.1, 1788.0; 133.0, 7031.0; 134.0, 988.0; 135.0, 2883.0; 136.0, 370.0; 137.0, 435.0; 143.1, 162.0; 145.1, 1892.0; 146.1, 705.0; 147.1, 1081.0; 148.0, 274.0; 148.9, 616.0; 151.0, 4864.0; 151.9, 1517.0; 153.1, 509.0; 155.8, 183.0; 159.0, 589.0; 160.0, 528.0; 161.0, 434.0; 163.1, 327.0; 164.1, 1540.0; 165.1, 343.0; 176.0, 1263.0; 177.0, 4051.0; 178.0, 708.0; 179.1, 540.0; 187.1, 1407.0; 188.1, 280.0; 191.0, 564.0; 191.9, 236.0; 192.9, 904.0; 194.0, 206.0; 202.1, 2511.0; 203.1, 466.0; 207.0, 1074.0; 207.8, 234.0; 208.9, 228.0; 234.9, 394.0; 236.9, 236.0; 251.0, 555.0; 252.9, 662.0; 254.0, 163.0; 267.0, 2989.0; 268.0, 779.0; 269.0, 621.0; 280.9, 347.0; 307.9, 212.0; 309.1, 986.0; 310.0, 305.0; 311.0, 383.0; 325.0, 372.0; 327.0, 642.0; 327.8, 269.0; 330.9, 198.0; 341.0, 541.0; 342.0, 234.0; 343.0, 186.0; 383.0, 186.0; 399.0, 248.0; 400.9, 182.0; 415.0, 498.0; 415.8, 182.0; 498.2, 412.0; 499.1, 875.0; 500.1, 356.0                                    |
| 6 | 11.984 | 31.0, 301.0; 32.0, 635.0; 34.9, 212.0; 36.0, 1173.0; 38.0, 517.0; 39.1, 753.0; 40.0, 194.0; 41.1, 1125.0; 42.0, 188.0; 43.0, 438.0; 44.0, 367.0; 45.0, 366.0; 51.0, 329.0; 52.0, 189.0; 53.0, 516.0; 55.0, 792.0; 56.1, 178.0; 57.0, 169.0; 58.0, 166.0; 58.9, 282.0; 60.9, 171.0; 63.0, 305.0; 65.1, 482.0; 66.0, 166.0; 67.1, 1170.0; 67.9, 1029.0; 69.0, 432.0; 73.0, 553.0; 74.0, 196.0; 74.8, 391.0; 76.0, 175.0; 77.1, 1907.0; 78.1, 441.0; 79.0, 957.0; 80.1, 264.0; 81.0, 933.0; 82.0, 271.0; 83.0, 330.0; 86.8, 160.0; 89.0, 371.0; 91.0, 2310.0; 92.1, 738.0; 93.1, 1889.0; 94.2, 407.0; 95.1, 6194.0; 96.1, 503.0; 102.2, 159.0; 103.0, 662.0; 103.9, 378.0; 105.0, 4611.0; 106.0, 578.0; 107.0, 521.0; 108.0, 241.0; 109.0, 345.0; 110.1, 1939.0; 111.1, 215.0; 115.0, 847.0; 116.0, 260.0; 117.0, 803.0; 117.9, 218.0; 119.0, 2897.0; 120.0, 1729.0; 120.9, 776.0; 121.9, 185.0; 123.0, 196.0; 126.0, 343.0; 126.9, 224.0; 128.0, 520.0; 129.1, 366.0; 131.0, 1013.0; 132.1, 2855.0; 133.0, 6079.0; 133.9, 991.0; 135.0, 2555.0; 135.9, 326.0; 136.9, 279.0; 139.1, 223.0; 141.0, 254.0; 143.1, 158.0; 145.1, 1517.0; 146.1, 455.0; 147.0, 611.0; 148.1, 196.0; 149.0, 229.0; 151.0, 4065.0; 152.0, 777.0; 153.0, 386.0; 155.1, 152.0; 159.0, 278.0; 160.0, 227.0; 161.0, 325.0; 163.0, 172.0; 164.1, 190.0; 176.0, 1096.0; 177.0, 4405.0; 178.0, 694.0; 178.9, 536.0; 187.0, 361.0; 190.9, 447.0; 191.8, 234.0; 192.9, 818.0; 193.8, 193.0; 202.1, 1253.0; 203.0, 248.0; 207.1, 964.0; 208.0, 190.0; 209.0, 354.0; 235.0, 437.0; 236.9, 203.0; 251.0, 583.0; 252.0, 204.0; 253.0, 608.0; 267.0, 2963.0; 268.0, 727.0; 269.0, 605.0; 281.0, 404.0; 308.1, 234.0; 309.0, 1028.0; 310.1, 231.0; 311.0, 194.0; 325.0, 211.0; 327.0, 494.0; 328.0, 155.0; 331.0, 235.0; 340.9, 403.0; 342.0, 193.0; 343.1, 184.0; 399.0, 155.0; 415.1, 301.0; 416.2, 163.0; 416.9, 154.0; 498.2, 317.0; 499.1, 540.0; 500.1, 254.0; 501.1, 183.0 |

|   |        |                                                                                                                                                                                                                                                                                                                                                                                                                                                                                                                                                                                                                                                                                                                                                                                                                                                                                                                                                                                                                                                                                                                                                                                                                                                                                                                                                                                                                                                                                                                                                                                                                                                                                                                                                |
|---|--------|------------------------------------------------------------------------------------------------------------------------------------------------------------------------------------------------------------------------------------------------------------------------------------------------------------------------------------------------------------------------------------------------------------------------------------------------------------------------------------------------------------------------------------------------------------------------------------------------------------------------------------------------------------------------------------------------------------------------------------------------------------------------------------------------------------------------------------------------------------------------------------------------------------------------------------------------------------------------------------------------------------------------------------------------------------------------------------------------------------------------------------------------------------------------------------------------------------------------------------------------------------------------------------------------------------------------------------------------------------------------------------------------------------------------------------------------------------------------------------------------------------------------------------------------------------------------------------------------------------------------------------------------------------------------------------------------------------------------------------------------|
|   |        | 31.1, 277.0; 32.0, 493.0; 35.0, 245.0; 36.0, 1233.0; 37.0, 172.0; 38.0, 501.0; 39.0, 1848.0; 40.0, 382.0; 41.1, 2564.0; 42.0, 284.0; 43.1, 948.0; 44.0, 403.0; 45.0, 384.0; 50.0, 534.0; 51.1, 1301.0; 52.0, 521.0; 53.1, 1580.0; 53.9, 267.0; 55.0, 3909.0; 56.0, 249.0; 57.0, 231.0; 58.0, 166.0; 59.0, 221.0; 60.9, 244.0; 62.0, 364.0; 63.0, 1076.0; 63.9, 378.0; 65.1, 2469.0; 66.1, 622.0; 67.1, 2662.0; 68.1, 1206.0; 69.1, 10237.0; 70.0, 858.0; 70.9, 181.0; 73.0, 609.0; 74.1, 332.0; 75.0, 661.0; 76.2, 509.0; 77.1, 6114.0; 78.1, 1853.0; 79.0, 2482.0; 80.1, 580.0; 81.0, 1811.0; 82.0, 538.0; 83.1, 286.0; 89.0, 819.0; 91.1, 11165.0; 92.1, 2686.0; 93.0, 2136.0; 94.1, 579.0; 95.1, 1926.0; 96.0, 428.0; 102.1, 672.0; 103.1, 4131.0; 104.1, 2954.0; 105.0, 3916.0; 106.0, 1378.0; 107.1, 1402.0; 108.1, 508.0; 109.1, 7555.0; 110.0, 933.0; 111.1, 266.0; 115.0, 1885.0; 116.0, 536.0; 117.0, 2848.0; 118.1, 2866.0; 119.0, 2363.0; 120.1, 4314.0; 121.1, 2867.0; 122.1, 712.0; 123.0, 167.0; 126.0, 484.0; 126.9, 296.0; 128.0, 898.0; 129.1, 880.0; 130.0, 407.0;                                                                                                                                                                                                                                                                                                                                                                                                                                                                                                                                                                                                                                                           |
| 7 | 12.281 | 131.0, 5645.0; 132.1, 2188.0; 133.0, 8424.0; 134.0, 1764.0; 135.0, 2976.0; 135.9, 391.0; 136.9, 989.0; 140.9, 275.0; 141.9, 188.0; 143.1, 326.0; 144.1, 200.0; 145.1, 2712.0; 146.1, 1527.0; 147.1, 2157.0; 148.0, 474.0; 149.1, 5292.0; 150.1, 703.0; 151.0, 3836.0; 151.9, 767.0; 153.0, 404.0; 153.9, 150.0; 155.0, 233.0; 159.1, 1928.0; 160.1, 586.0; 160.9, 634.0; 162.0, 153.0; 164.1, 15342.0; 165.1, 2104.0; 166.0, 256.0; 168.1, 150.0; 173.1, 467.0; 176.1, 1202.0; 177.0, 4143.0; 178.1, 856.0; 179.0, 570.0; 187.2, 1310.0; 191.0, 434.0; 191.9, 172.0; 193.0, 909.0; 193.9, 158.0; 194.8, 162.0; 202.2, 9233.0; 203.1, 1403.0; 204.1, 202.0; 207.0, 1071.0; 208.0, 266.0; 209.0, 241.0; 222.8, 191.0; 235.0, 363.0; 237.0, 235.0; 249.0, 171.0; 250.9, 638.0; 253.0, 800.0; 253.8, 154.0; 267.0, 2563.0; 267.9, 714.0; 268.9, 533.0; 280.9, 418.0; 307.8, 206.0; 309.0, 829.0; 309.9, 275.0; 310.8, 172.0; 325.1, 213.0; 327.0, 504.0; 327.8, 162.0; 331.0, 214.0; 340.8, 470.0; 382.9, 187.0; 415.1, 198.0; 416.0, 156.0; 498.1, 217.0; 499.2, 438.0; 500.1, 203.0                                                                                                                                                                                                                                                                                                                                                                                                                                                                                                                                                                                                                                                              |
|   |        | 31.0, 279.0; 32.0, 703.0; 35.0, 193.0; 36.0, 1210.0; 38.0, 430.0; 39.0, 658.0; 40.1, 247.0; 41.1, 651.0; 42.0, 197.0; 43.0, 397.0; 44.0, 508.0; 45.0, 349.0; 50.0, 165.0; 51.0, 334.0; 52.1, 173.0; 52.9, 427.0; 55.0, 563.0; 61.0, 205.0; 63.0, 221.0; 65.0, 723.0; 65.9, 160.0; 67.1, 899.0; 67.9, 290.0; 69.0, 266.0; 71.0, 162.0; 73.1, 475.0; 75.1, 414.0; 76.0, 215.0; 77.1, 1883.0; 78.0, 437.0; 79.1, 1040.0; 80.1, 227.0; 81.1, 862.0; 82.0, 189.0; 83.0, 154.0; 84.0, 151.0; 88.9, 339.0; 90.2, 184.0; 91.1, 4838.0; 92.0, 2355.0; 93.1, 3455.0; 94.2, 446.0; 95.0, 588.0; 95.7, 195.0; 98.0, 157.0; 99.9, 173.0; 103.0, 749.0; 103.9, 331.0; 105.0, 1237.0; 106.0, 265.0; 107.0, 766.0; 108.1, 787.0; 109.1, 1629.0; 110.1, 389.0; 115.0, 985.0; 115.8, 169.0; 116.2, 151.0; 117.0, 1074.0; 118.0, 433.0; 119.0, 967.0; 120.0, 416.0; 121.0, 638.0; 122.1, 228.0; 123.0, 166.0; 126.0, 446.0; 127.0, 274.0; 128.1, 468.0; 129.0, 868.0; 130.1, 224.0; 131.1, 733.0;                                                                                                                                                                                                                                                                                                                                                                                                                                                                                                                                                                                                                                                                                                                                                                 |
| 8 | 12.417 | 133.0, 5662.0; 134.0, 687.0; 135.0, 2618.0; 136.0, 334.0; 137.0, 364.0; 140.9, 159.0; 142.0, 246.0; 143.0, 495.0; 144.0, 280.0; 145.0, 721.0; 146.0, 274.0; 146.9, 530.0; 148.1, 236.0; 148.9, 308.0; 151.0, 4780.0; 152.0, 759.0; 153.0, 397.0; 153.9, 206.0; 155.0, 165.0; 156.0, 155.0; 157.1, 746.0; 158.0, 383.0; 159.1, 166.0; 160.9, 264.0; 163.0, 279.0; 164.0, 380.0; 165.2, 264.0; 166.1, 271.0; 171.1, 242.0; 176.1, 1014.0; 177.0, 4139.0; 178.0, 783.0; 178.9, 551.0; 185.1, 447.0; 187.2, 154.0; 190.9, 370.0; 192.0, 173.0; 193.0, 831.0; 194.0, 160.0; 194.7, 163.0; 195.0, 152.0; 200.2, 726.0; 201.1, 171.0; 201.9, 210.0; 207.0, 1198.0; 207.9, 255.0; 208.9, 295.0; 222.9, 163.0; 234.8, 332.0; 237.0, 197.0; 249.0, 156.0; 250.9, 621.0; 252.9, 721.0; 267.0, 2299.0; 268.0, 641.0; 269.0, 557.0; 281.0, 240.0; 307.9, 310.0; 308.9, 827.0; 309.9, 194.0; 310.9, 168.0; 324.9, 246.0; 327.0, 519.0; 331.1, 223.0; 341.1, 460.0; 415.1, 194.0; 498.1, 186.0; 499.0, 490.0                                                                                                                                                                                                                                                                                                                                                                                                                                                                                                                                                                                                                                                                                                                                                  |
|   |        | 30.9, 229.0; 32.0, 606.0; 35.0, 262.0; 36.0, 976.0; 37.9, 437.0; 39.0, 795.0; 40.0, 254.0; 41.1, 2428.0; 42.0, 574.0; 43.1, 2312.0; 44.0, 556.0; 45.0, 315.0; 51.0, 263.0; 52.9, 515.0; 54.1, 274.0; 55.1, 1881.0; 56.0, 732.0; 57.1, 2346.0; 58.0, 304.0; 61.1, 166.0; 62.9, 275.0; 65.0, 399.0; 67.0, 908.0; 68.0, 743.0; 69.0, 2328.0; 70.1, 653.0; 71.0, 1299.0; 73.0, 588.0; 75.0, 482.0; 75.9, 178.0; 77.0, 1460.0; 78.0, 373.0; 79.1, 1053.0; 80.1, 185.0; 81.0, 796.0; 82.1, 335.0; 83.0, 976.0; 83.9, 372.0; 85.1, 680.0; 88.9, 316.0; 91.0, 5465.0; 91.9, 437.0; 93.0, 2062.0; 94.0, 335.0; 94.9, 238.0; 96.0, 229.0; 97.0, 660.0; 98.1, 261.0; 100.0, 205.0; 103.0, 686.0; 104.0, 361.0; 105.0, 2233.0; 105.9, 369.0; 107.1, 829.0; 107.8, 159.0; 109.1, 216.0; 110.0, 164.0; 115.0, 675.0; 116.0, 177.0; 117.0, 829.0; 118.0, 292.0; 119.0, 1488.0; 119.9, 304.0; 121.0, 922.0; 122.1, 287.0; 126.1, 322.0; 126.9, 199.0; 128.0, 200.0; 128.9, 332.0; 131.1, 750.0; 133.0, 5790.0; 134.0, 891.0; 135.0, 2388.0; 135.9, 325.0; 136.9, 301.0; 142.9, 164.0; 145.0, 319.0; 146.1, 219.0; 147.1, 549.0; 149.0, 726.0; 150.0, 186.0; 151.0, 3853.0; 152.0, 575.0; 153.0, 363.0; 159.1, 1322.0; 160.1, 241.0; 161.0, 459.0; 162.0, 283.0; 162.9, 332.0; 164.1, 691.0; 165.0, 218.0; 175.1, 157.0; 176.0, 994.0; 177.0, 4493.0; 178.0, 642.0; 178.9, 661.0; 189.1, 399.0; 190.2, 176.0; 190.9, 472.0; 192.0, 221.0; 192.9, 818.0; 202.0, 239.0; 204.0, 315.0; 205.1, 182.0; 207.0, 1195.0; 208.0, 227.0; 209.0, 335.0; 222.9, 191.0; 234.9, 387.0; 237.0, 173.0; 250.9, 570.0; 251.9, 186.0; 252.9, 605.0; 267.0, 2635.0; 267.9, 786.0; 269.0, 573.0; 281.0, 366.0; 307.8, 174.0; 309.0, 702.0; 310.0, 255.0; 310.9, 202.0; 324.9, 182.0; |

|    |        |                                                                                                                                                                                                                                                                                                                                                                                                                                                                                                                                                                                                                                                                                                                                                                                                                                                                                                                                                                                                                                                                                                                                                                                                                                                                                                                                                                                                                                                                                                                                                                                                                                                                                                                                                                                                                                                                                                                                                         |
|----|--------|---------------------------------------------------------------------------------------------------------------------------------------------------------------------------------------------------------------------------------------------------------------------------------------------------------------------------------------------------------------------------------------------------------------------------------------------------------------------------------------------------------------------------------------------------------------------------------------------------------------------------------------------------------------------------------------------------------------------------------------------------------------------------------------------------------------------------------------------------------------------------------------------------------------------------------------------------------------------------------------------------------------------------------------------------------------------------------------------------------------------------------------------------------------------------------------------------------------------------------------------------------------------------------------------------------------------------------------------------------------------------------------------------------------------------------------------------------------------------------------------------------------------------------------------------------------------------------------------------------------------------------------------------------------------------------------------------------------------------------------------------------------------------------------------------------------------------------------------------------------------------------------------------------------------------------------------------------|
|    |        | 327.1, 478.0; 327.9, 217.0; 329.0, 196.0; 331.1, 202.0; 340.9, 468.0; 383.0, 166.0; 398.9, 158.0; 401.0, 183.0; 415.0, 318.0; 498.0, 240.0; 499.1, 354.0; 500.3, 165.0; 501.0, 151.0                                                                                                                                                                                                                                                                                                                                                                                                                                                                                                                                                                                                                                                                                                                                                                                                                                                                                                                                                                                                                                                                                                                                                                                                                                                                                                                                                                                                                                                                                                                                                                                                                                                                                                                                                                    |
| 10 | 12.660 | 31.1, 227.0; 32.0, 665.0; 35.0, 269.0; 36.0, 1135.0; 37.0, 165.0; 38.0, 471.0; 39.0, 1227.0; 40.0, 211.0; 41.1, 3069.0; 42.1, 312.0; 43.1, 1003.0; 44.0, 441.0; 44.9, 438.0; 50.0, 250.0; 51.1, 500.0; 52.0, 191.0; 53.0, 1039.0; 54.1, 201.0; 55.1, 2240.0; 56.1, 725.0; 57.0, 344.0; 58.9, 188.0; 61.0, 215.0; 63.0, 287.0; 64.0, 154.0; 65.0, 1019.0; 66.1, 281.0; 67.0, 1234.0; 67.9, 537.0; 69.0, 2035.0; 70.0, 363.0; 71.1, 275.0; 73.0, 556.0; 75.0, 447.0; 76.2, 285.0; 77.1, 4004.0; 78.0, 1003.0; 79.0, 3272.0; 80.1, 373.0; 81.1, 1313.0; 82.0, 1333.0; 83.0, 1023.0; 84.0, 299.0; 89.0, 439.0; 90.0, 162.0; 91.1, 6046.0; 92.0, 2031.0; 93.1, 8752.0; 94.1, 1450.0; 95.0, 932.0; 96.1, 204.0; 97.0, 324.0; 102.1, 197.0; 103.0, 974.0; 104.0, 504.0; 105.0, 7237.0; 106.0, 1432.0; 107.1, 3087.0; 108.0, 519.0; 109.1, 1312.0; 110.0, 240.0; 111.1, 216.0; 115.0, 967.0; 115.9, 204.0; 117.1, 1219.0; 119.1, 14721.0; 120.1, 2735.0; 121.1, 10584.0; 122.1, 1770.0; 123.1, 321.0; 125.9, 420.0; 126.9, 206.0; 128.0, 305.0; 129.0, 329.0; 131.0, 767.0; 132.1, 785.0; 133.0, 7705.0; 134.0, 3268.0; 135.0, 3610.0; 136.0, 482.0; 137.0, 281.0; 145.1, 562.0; 146.1, 234.0; 147.0, 1674.0; 148.0, 943.0; 149.0, 389.0; 151.0, 3685.0; 152.1, 670.0; 153.0, 317.0; 159.0, 260.0; 159.9, 208.0; 161.1, 2221.0; 162.1, 527.0; 163.0, 218.0; 164.1, 182.0; 165.1, 288.0; 176.0, 1165.0; 177.0, 4348.0; 178.0, 730.0; 179.0, 685.0; 189.1, 1002.0; 190.1, 224.0; 191.0, 377.0; 191.9, 220.0; 192.9, 751.0; 194.1, 213.0; 202.1, 276.0; 204.1, 6627.0; 205.2, 1256.0; 207.0, 1027.0; 207.9, 321.0; 208.9, 235.0; 223.0, 159.0; 235.0, 371.0; 237.0, 200.0; 250.8, 552.0; 252.9, 776.0; 267.0, 2766.0; 268.0, 680.0; 269.0, 534.0; 281.0, 267.0; 308.0, 234.0; 309.0, 949.0; 309.9, 254.0; 311.0, 156.0; 324.8, 279.0; 326.9, 380.0; 328.0, 185.0; 331.0, 230.0; 340.9, 525.0; 341.9, 212.0; 342.9, 166.0; 414.9, 245.0; 499.0, 324.0; 500.0, 208.0 |
| 11 | 12.702 | 31.0, 277.0; 32.0, 640.0; 35.0, 296.0; 35.9, 1065.0; 38.0, 401.0; 39.0, 565.0; 40.0, 222.0; 41.1, 1751.0; 42.1, 237.0; 43.1, 516.0; 44.0, 467.0; 45.0, 408.0; 50.0, 168.0; 51.0, 337.0; 53.0, 377.0; 54.1, 209.0; 55.0, 1147.0; 56.0, 256.0; 57.0, 277.0; 59.1, 182.0; 61.0, 242.0; 63.0, 274.0; 65.1, 561.0; 67.0, 572.0; 68.0, 511.0; 69.1, 948.0; 71.0, 153.0; 73.0, 611.0; 75.1, 397.0; 75.9, 206.0; 77.1, 1678.0; 78.0, 438.0; 79.0, 776.0; 80.0, 188.0; 81.1, 508.0; 81.9, 260.0; 83.0, 854.0; 88.9, 344.0; 91.0, 2845.0; 92.1, 386.0; 93.1, 663.0; 93.9, 197.0; 95.1, 658.0; 96.0, 339.0; 96.8, 227.0; 101.9, 158.0; 103.0, 899.0; 104.0, 526.0; 105.1, 4691.0; 106.1, 501.0; 107.0, 313.0; 110.0, 249.0; 111.0, 165.0; 115.1, 1633.0; 116.1, 376.0; 117.1, 2246.0; 118.1, 866.0; 119.0, 9073.0; 120.1, 2227.0; 121.0, 712.0; 125.9, 548.0; 127.0, 222.0; 128.1, 455.0; 129.0, 415.0; 130.0, 272.0; 131.0, 2966.0; 132.1, 8336.0; 133.0, 6364.0; 134.0, 1046.0; 135.0, 2964.0; 136.0, 394.0; 136.9, 280.0; 141.9, 193.0; 143.0, 259.0; 144.1, 198.0; 145.1, 3368.0; 146.1, 700.0; 146.9, 604.0; 148.9, 181.0; 151.0, 3418.0; 152.0, 659.0; 152.9, 370.0; 154.0, 179.0; 157.1, 305.0; 159.1, 579.0; 160.0, 223.0; 161.1, 702.0; 162.2, 179.0; 163.1, 183.0; 164.9, 207.0; 176.0, 1035.0; 177.0, 4421.0; 178.0, 940.0; 179.0, 573.0; 187.1, 560.0; 190.9, 454.0; 191.9, 240.0; 192.9, 824.0; 193.8, 205.0; 195.0, 193.0; 202.1, 3588.0; 203.2, 624.0; 204.1, 374.0; 207.0, 1154.0; 208.1, 319.0; 209.0, 211.0; 222.9, 156.0; 235.1, 392.0; 236.9, 185.0; 250.9, 482.0; 252.9, 719.0; 254.0, 227.0; 255.0, 176.0; 267.0, 2529.0; 268.0, 685.0; 269.0, 540.0; 269.9, 156.0; 281.0, 315.0; 308.0, 213.0; 309.0, 854.0; 310.1, 273.0; 311.0, 197.0; 325.0, 206.0; 327.0, 516.0; 328.0, 168.0; 331.0, 261.0; 341.1, 467.0; 342.1, 155.0; 343.0, 176.0; 415.0, 164.0; 499.1, 423.0; 500.0, 225.0                                                         |
| 12 | 12.850 | 31.1, 342.0; 32.0, 630.0; 34.9, 257.0; 36.0, 982.0; 38.0, 488.0; 39.1, 1524.0; 40.1, 352.0; 41.1, 4308.0; 42.0, 557.0; 43.1, 812.0; 44.0, 379.0; 45.1, 439.0; 50.0, 239.0; 51.0, 815.0; 52.0, 372.0; 53.0, 1239.0; 54.0, 334.0; 55.1, 2387.0; 56.0, 1866.0; 57.0, 683.0; 58.1, 214.0; 58.9, 266.0; 63.0, 432.0; 63.9, 190.0; 65.0, 1333.0; 66.0, 256.0; 67.0, 1327.0; 68.1, 924.0; 69.1, 5874.0; 70.1, 1267.0; 71.0, 245.0; 73.0, 733.0; 73.9, 189.0; 75.1, 435.0; 76.0, 293.0; 77.0, 7533.0; 78.0, 1424.0; 79.1, 2517.0; 80.0, 556.0; 81.1, 838.0; 82.0, 558.0; 83.0, 410.0; 84.0, 434.0; 88.9, 666.0; 91.1, 11153.0; 92.0, 4305.0; 93.1, 19896.0; 94.1, 2381.0; 95.0, 1324.0; 96.0, 223.0; 97.1, 504.0; 102.0, 252.0; 103.1, 1897.0; 104.1, 554.0; 105.0, 4821.0; 106.1, 831.0; 107.0, 2779.0; 107.9, 332.0; 109.0, 1550.0; 110.1, 235.0; 115.0, 1384.0; 116.0, 314.0; 117.0, 1263.0; 119.1, 27584.0; 120.1, 3771.0; 121.0, 2065.0; 122.0, 477.0; 125.9, 307.0; 128.0, 279.0; 129.2, 284.0; 129.9, 158.0; 131.0, 751.0; 132.0, 790.0; 133.0, 5962.0; 134.0, 1364.0; 135.0, 3442.0; 135.9, 516.0; 136.9, 219.0; 145.1, 575.0; 146.0, 369.0; 147.0, 1627.0; 148.0, 478.0; 149.0, 350.0; 151.0, 3184.0; 152.0, 635.0; 153.0, 443.0; 157.9, 156.0; 159.1, 221.0; 160.0, 237.0; 161.1, 1512.0; 162.0, 428.0; 163.1, 2508.0; 164.0, 446.0; 165.1, 202.0; 176.1, 943.0; 177.0, 4281.0; 178.1, 6401.0; 179.1, 1281.0; 187.0, 174.0; 189.1, 898.0; 190.0, 225.0; 190.9, 401.0; 193.0, 768.0; 195.0, 238.0; 202.0, 383.0; 204.2, 3778.0; 205.1, 569.0; 206.3, 182.0; 207.0, 997.0; 208.0, 341.0; 208.9, 230.0; 235.0, 288.0; 250.9, 570.0; 253.0, 997.0; 254.0, 192.0; 267.0, 2486.0; 268.0, 777.0; 269.0, 487.0; 281.0, 471.0; 308.1, 217.0; 309.1, 961.0; 310.0, 176.0; 310.9, 182.0; 324.9, 202.0; 327.0, 472.0; 328.9, 174.0; 331.0, 238.0; 341.0, 602.0; 346.0, 159.0; 414.9, 260.0; 499.0, 335.0; 500.1, 215.0                                            |

|     |        |                                                                                                                                                                                                                                                                                                                                                                                                                                                                                                                                                                                                                                                                                                                                                                                                                                                                                                                                                                                                                                                                                                                                                                                                                                                                                                                                                                                                                                                                                                                                                                                                                                                                                                                                                                                                                                                                                                                                                                                                                                                                                                                                                                                                                                                                                                                                                                                         |
|-----|--------|-----------------------------------------------------------------------------------------------------------------------------------------------------------------------------------------------------------------------------------------------------------------------------------------------------------------------------------------------------------------------------------------------------------------------------------------------------------------------------------------------------------------------------------------------------------------------------------------------------------------------------------------------------------------------------------------------------------------------------------------------------------------------------------------------------------------------------------------------------------------------------------------------------------------------------------------------------------------------------------------------------------------------------------------------------------------------------------------------------------------------------------------------------------------------------------------------------------------------------------------------------------------------------------------------------------------------------------------------------------------------------------------------------------------------------------------------------------------------------------------------------------------------------------------------------------------------------------------------------------------------------------------------------------------------------------------------------------------------------------------------------------------------------------------------------------------------------------------------------------------------------------------------------------------------------------------------------------------------------------------------------------------------------------------------------------------------------------------------------------------------------------------------------------------------------------------------------------------------------------------------------------------------------------------------------------------------------------------------------------------------------------------|
|     |        | 31.0, 255.0; 32.0, 608.0; 35.0, 279.0; 36.0, 1067.0; 38.0, 520.0; 39.0, 1870.0; 40.1, 459.0; 41.1, 3049.0; 42.1, 459.0; 43.1, 1013.0; 44.0, 550.0; 44.9, 408.0; 49.9, 254.0; 51.0, 769.0; 52.0, 646.0; 53.1, 1760.0; 54.0, 351.0; 55.0, 2449.0; 56.1, 304.0; 57.0, 374.0; 59.1, 174.0; 63.0, 613.0; 63.9, 305.0; 65.1, 2116.0; 66.0, 575.0; 67.1, 2190.0; 68.1, 769.0; 69.1, 884.0; 70.0, 327.0; 71.0, 486.0; 73.0, 549.0; 74.0, 173.0; 75.1, 624.0; 77.0, 6521.0; 78.0, 1505.0; 79.1, 5363.0; 80.0, 1062.0; 81.1, 2190.0; 82.1, 279.0; 82.9, 399.0; 84.1, 217.0; 85.0, 171.0; 87.1, 164.0; 87.9, 166.0; 89.0, 646.0; 91.1, 9927.0; 92.1, 1972.0; 93.0, 6990.0; 94.1, 1127.0; 95.1, 880.0; 96.0, 365.0; 97.1, 588.0; 98.0, 203.0; 102.0, 385.0; 103.0, 1708.0; 104.1, 892.0; 105.1, 9662.0; 106.1, 2441.0; 107.1, 2238.0; 108.0, 1096.0; 109.1, 524.0; 110.2, 174.0; 115.0, 3263.0; 116.0, 1160.0; 117.1, 4247.0; 118.1, 3059.0; 119.1, 5201.0; 120.1, 1995.0; 121.1, 12438.0; 122.1, 1530.0; 126.0, 419.0; 127.0, 588.0; 128.1, 2186.0; 129.1, 2721.0; 130.0, 1562.0; 131.1, 11008.0; 132.1, 2139.0; 133.0, 6576.0; 134.0, 1492.0; 135.0, 2469.0; 135.9, 412.0; 137.0, 229.0; 139.0, 185.0; 141.1, 967.0; 142.0, 748.0; 143.1, 1493.0; 145.1, 27520.0; 146.1, 5069.0; 147.1, 7067.0; 148.0, 845.0; 149.0, 225.0; 151.0, 3569.0; 152.0, 751.0; 153.0, 532.0; 153.9, 165.0; 154.9, 260.0; 156.1, 164.0; 157.0, 647.0; 158.2, 417.0; 159.1, 5220.0; 160.1, 2656.0; 161.1, 769.0; 162.9, 304.0; 163.8, 220.0; 165.0, 370.0; 172.2, 163.0; 173.1, 1060.0; 174.1, 502.0; 176.0, 909.0; 177.0, 4091.0; 178.0, 1044.0; 179.0, 557.0; 184.9, 360.0; 187.1, 13843.0; 188.2, 2196.0; 189.1, 238.0; 191.0, 412.0; 192.0, 208.0; 193.0, 810.0; 194.9, 173.0; 200.1, 252.0; 202.2, 13823.0; 203.2, 2076.0; 204.0, 204.0; 207.0, 1039.0; 208.0, 239.0; 209.1, 243.0; 209.9, 181.0; 222.8, 166.0; 234.8, 330.0; 250.9, 582.0; 252.9, 727.0; 253.9, 179.0; 266.9, 2601.0; 267.9, 741.0; 269.0, 498.0; 281.0, 344.0; 308.0, 280.0; 309.0, 842.0; 310.1, 283.0; 311.0, 165.0; 325.0, 181.0; 327.0, 412.0; 331.0, 257.0; 341.0, 500.0; 343.0, 163.0; 415.2, 199.0; 498.2, 168.0; 499.1, 256.0; 500.1, 156.0                                                                                                                                                                                                |
| 13  | 12.886 | 30.9, 185.0; 32.0, 643.0; 34.9, 226.0; 36.0, 956.0; 37.0, 166.0; 38.0, 749.0; 39.0, 5541.0; 40.0, 1249.0; 41.1, 8308.0; 42.1, 594.0; 43.1, 565.0; 44.0, 558.0; 45.0, 255.0; 50.0, 964.0; 51.1, 3275.0; 52.0, 1359.0; 53.1, 4668.0; 54.1, 466.0; 55.1, 1299.0; 56.0, 166.0; 57.1, 296.0; 57.8, 271.0; 59.0, 173.0; 61.0, 205.0; 62.0, 559.0; 63.1, 2624.0; 64.0, 989.0; 65.0, 7967.0; 66.1, 1744.0; 67.0, 785.0; 68.0, 360.0; 69.0, 379.0; 69.9, 211.0; 71.0, 245.0; 72.9, 465.0; 73.9, 531.0; 75.0, 1046.0; 76.1, 1113.0; 77.1, 16299.0; 78.1, 5268.0; 79.1, 8170.0; 80.1, 1203.0; 81.1, 2889.0; 82.0, 807.0; 82.7, 306.0; 83.2, 320.0; 84.0, 302.0; 84.9, 180.0; 86.0, 247.0; 87.1, 410.0; 88.1, 243.0; 89.0, 2844.0; 91.1, 44192.0; 92.1, 4118.0; 93.1, 5470.0; 94.0, 597.0; 95.0, 251.0; 97.0, 265.0; 98.0, 192.0; 101.0, 522.0; 102.1, 2554.0; 103.1, 11562.0; 104.1, 8494.0; 105.0, 5826.0; 106.1, 587.0; 107.0, 550.0; 108.0, 483.0; 109.1, 277.0; 109.9, 165.0; 113.1, 203.0; 114.0, 391.0; 115.1, 15200.0; 116.1, 4004.0; 117.1, 33464.0; 119.1, 414784.0; 120.1, 39712.0; 121.1, 2179.0; 122.0, 191.0; 123.1, 195.0; 125.0, 177.0; 126.0, 706.0; 127.0, 1618.0; 128.1, 4530.0; 129.1, 2351.0; 130.0, 551.0; 131.1, 666.0; 132.0, 998.0; 133.0, 5264.0; 134.0, 886.0; 135.0, 2535.0; 135.9, 484.0; 137.0, 276.0; 139.1, 675.0; 139.9, 204.0; 141.0, 2358.0; 142.1, 1450.0; 143.0, 1198.0; 144.0, 945.0; 145.1, 489.0; 145.9, 284.0; 146.9, 632.0; 148.9, 175.0; 151.0, 3908.0; 152.1, 1920.0; 153.1, 1831.0; 154.1, 949.0; 155.1, 976.0; 156.2, 488.0; 157.0, 669.0; 158.1, 318.0; 159.1, 207.0; 160.0, 191.0; 160.9, 382.0; 162.9, 304.0; 164.1, 293.0; 165.1, 1224.0; 166.0, 419.0; 167.1, 620.0; 168.1, 408.0; 169.1, 868.0; 170.1, 238.0; 171.2, 309.0; 175.0, 158.0; 176.0, 1193.0; 177.0, 4109.0; 178.0, 758.0; 178.9, 949.0; 180.0, 197.0; 183.0, 238.0; 185.1, 3296.0; 186.1, 545.0; 187.2, 226.0; 190.9, 415.0; 192.0, 182.0; 193.0, 847.0; 194.1, 1397.0; 194.9, 376.0; 200.1, 15469.0; 201.1, 2421.0; 202.1, 525.0; 207.1, 1072.0; 208.0, 284.0; 208.9, 269.0; 235.0, 440.0; 251.0, 615.0; 253.0, 766.0; 253.9, 254.0; 267.0, 2448.0; 267.9, 775.0; 268.9, 442.0; 280.9, 325.0; 308.1, 241.0; 309.0, 764.0; 310.0, 258.0; 310.9, 197.0; 324.9, 191.0; 327.0, 359.0; 327.9, 178.0; 331.0, 216.0; 340.9, 465.0; 342.0, 199.0; 383.0, 173.0; 415.1, 175.0; 499.0, 292.0 |
| 14  | 12.975 | 31.0, 219.0; 32.0, 674.0; 34.9, 221.0; 36.0, 1125.0; 37.9, 398.0; 39.0, 575.0; 40.1, 192.0; 41.0, 1594.0; 42.1, 301.0; 43.0, 512.0; 44.1, 477.0; 45.1, 344.0; 50.0, 168.0; 51.0, 335.0; 53.0, 460.0; 55.0, 1125.0; 56.1, 519.0; 57.0, 545.0; 58.0, 174.0; 59.0, 180.0; 63.0, 196.0; 65.0, 490.0; 66.0, 216.0; 67.0, 661.0; 68.1, 453.0; 69.1, 1173.0; 70.1, 403.0; 73.0, 595.0; 74.1, 163.0; 75.0, 383.0; 77.1, 2033.0; 78.1, 570.0; 79.0, 1162.0; 80.1, 289.0; 81.0, 607.0; 82.0, 611.0; 83.2, 355.0; 85.1, 158.0; 89.0, 355.0; 91.0, 2950.0; 92.1, 1246.0; 93.0, 2963.0; 94.0, 405.0; 95.0, 341.0; 96.1, 203.0; 102.0, 163.0; 103.0, 722.0; 104.1, 303.0; 105.0, 3326.0; 106.0, 566.0; 107.0, 1221.0; 108.0, 246.0; 109.1, 402.0; 110.0, 191.0; 115.0, 642.0; 116.0, 206.0; 117.0, 916.0; 119.0, 8282.0; 120.0, 1356.0; 121.0, 1825.0; 122.1, 705.0; 126.1, 322.0; 126.9, 200.0; 127.8, 296.0; 129.0, 228.0; 131.0, 363.0; 132.0, 622.0; 133.0, 5629.0; 134.1, 1132.0; 135.0, 2766.0; 135.9, 449.0; 136.9, 252.0; 145.1, 546.0; 146.1, 211.0; 146.9, 794.0; 148.0, 356.0; 148.9, 237.0; 151.0, 3850.0; 152.0, 725.0; 153.0, 424.0; 156.9, 151.0; 159.0, 207.0; 161.1, 1132.0; 162.0, 230.0; 163.0, 407.0; 164.0, 187.0; 174.9, 258.0; 176.0, 1026.0; 177.0, 4095.0; 178.0, 816.0; 178.9, 533.0; 180.1, 215.0; 187.2, 187.0; 188.8, 153.0; 191.1, 3589.0; 192.0, 691.0; 193.0, 854.0;                                                                                                                                                                                                                                                                                                                                                                                                                                                                                                                                                                                                                                                                                                                                                                                                                                                                                                                                                                                                  |
| 151 | 13.052 |                                                                                                                                                                                                                                                                                                                                                                                                                                                                                                                                                                                                                                                                                                                                                                                                                                                                                                                                                                                                                                                                                                                                                                                                                                                                                                                                                                                                                                                                                                                                                                                                                                                                                                                                                                                                                                                                                                                                                                                                                                                                                                                                                                                                                                                                                                                                                                                         |

|    |        |                                                                                                                                                                                                                                                                                                                                                                                                                                                                                                                                                                                                                                                                                                                                                                                                                                                                                                                                                                                                                                                                                                                                                                                                                                                                                                                                                                                                                                                                                                                                                                                                                                                                                                                                                                                                                                                                                                                                                                                                                                                                                                                                           |
|----|--------|-------------------------------------------------------------------------------------------------------------------------------------------------------------------------------------------------------------------------------------------------------------------------------------------------------------------------------------------------------------------------------------------------------------------------------------------------------------------------------------------------------------------------------------------------------------------------------------------------------------------------------------------------------------------------------------------------------------------------------------------------------------------------------------------------------------------------------------------------------------------------------------------------------------------------------------------------------------------------------------------------------------------------------------------------------------------------------------------------------------------------------------------------------------------------------------------------------------------------------------------------------------------------------------------------------------------------------------------------------------------------------------------------------------------------------------------------------------------------------------------------------------------------------------------------------------------------------------------------------------------------------------------------------------------------------------------------------------------------------------------------------------------------------------------------------------------------------------------------------------------------------------------------------------------------------------------------------------------------------------------------------------------------------------------------------------------------------------------------------------------------------------------|
|    |        | 194.0, 275.0; 195.0, 220.0; 202.1, 342.0; 204.1, 1261.0; 205.1, 324.0; 206.1, 512.0; 207.0, 1186.0; 208.0, 378.0; 208.9, 301.0; 222.9, 175.0; 234.9, 403.0; 250.9, 479.0; 253.0, 710.0; 254.0, 167.0; 267.0, 2707.0; 267.9, 522.0; 269.0, 685.0; 281.0, 332.0; 309.0, 802.0; 310.0, 252.0; 310.9, 248.0; 324.9, 212.0; 327.0, 473.0; 328.1, 160.0; 330.9, 262.0; 341.0, 415.0; 343.0, 171.0; 415.0, 191.0; 498.1, 193.0; 499.1, 327.0; 500.0, 165.0                                                                                                                                                                                                                                                                                                                                                                                                                                                                                                                                                                                                                                                                                                                                                                                                                                                                                                                                                                                                                                                                                                                                                                                                                                                                                                                                                                                                                                                                                                                                                                                                                                                                                       |
| 16 | 13.212 | 31.0, 393.0; 32.1, 621.0; 35.0, 287.0; 36.0, 1006.0; 38.0, 548.0; 39.1, 1877.0; 40.1, 448.0; 41.1, 6705.0; 42.0, 651.0; 43.1, 1273.0; 43.9, 477.0; 45.0, 349.0; 49.9, 252.0; 51.0, 747.0; 52.0, 398.0; 53.0, 1607.0; 54.1, 422.0; 55.1, 3894.0; 56.0, 648.0; 57.1, 2478.0; 57.9, 174.0; 59.1, 179.0; 59.8, 171.0; 63.0, 407.0; 63.9, 221.0; 65.0, 1526.0; 66.2, 420.0; 67.0, 2303.0; 68.0, 908.0; 69.1, 14174.0; 70.0, 977.0; 71.1, 2443.0; 72.3, 202.0; 73.0, 554.0; 74.9, 402.0; 77.0, 6792.0; 78.1, 1579.0; 79.1, 3765.0; 80.0, 841.0; 81.1, 1870.0; 82.1, 2114.0; 83.0, 531.0; 84.0, 389.0; 85.0, 246.0; 89.1, 381.0; 89.9, 173.0; 91.1, 9520.0; 92.1, 5659.0; 93.1, 10282.0; 94.0, 1817.0; 95.0, 1417.0; 96.1, 369.0; 97.1, 296.0; 102.2, 200.0; 103.0, 754.0; 104.1, 389.0; 105.0, 4195.0; 106.0, 1653.0; 107.1, 1671.0; 108.1, 417.0; 109.1, 5095.0; 110.0, 612.0; 111.0, 281.0; 112.1, 1431.0; 113.2, 649.0; 115.0, 862.0; 116.1, 206.0; 116.9, 868.0; 117.9, 419.0; 119.1, 3328.0; 120.1, 5829.0; 121.1, 1820.0; 122.1, 436.0; 122.9, 180.0; 126.0, 309.0; 126.7, 163.0; 127.9, 259.0; 129.1, 261.0; 131.1, 688.0; 133.0, 11402.0; 134.1, 2170.0; 135.0, 2723.0; 135.9, 596.0; 137.0, 371.0; 139.0, 181.0; 141.1, 225.0; 143.1, 242.0; 145.1, 655.0; 146.1, 291.0; 147.1, 1541.0; 148.0, 556.0; 148.9, 478.0; 151.0, 3477.0; 152.1, 536.0; 153.0, 353.0; 156.9, 170.0; 159.0, 317.0; 160.1, 656.0; 161.1, 10102.0; 162.1, 1469.0; 162.9, 360.0; 165.0, 468.0; 175.1, 260.0; 176.0, 1153.0; 177.0, 4107.0; 178.1, 701.0; 179.0, 624.0; 187.0, 215.0; 189.1, 442.0; 190.0, 231.0; 191.0, 606.0; 192.0, 946.0; 193.0, 910.0; 194.0, 181.0; 195.0, 175.0; 202.1, 353.0; 204.1, 4251.0; 205.1, 883.0; 207.0, 1052.0; 207.9, 315.0; 209.0, 368.0; 222.9, 174.0; 235.0, 431.0; 236.9, 257.0; 251.0, 525.0; 253.0, 779.0; 253.9, 194.0; 267.0, 2229.0; 267.9, 646.0; 268.9, 538.0; 281.0, 411.0; 308.1, 199.0; 309.0, 819.0; 309.9, 318.0; 310.8, 202.0; 326.9, 436.0; 331.0, 292.0; 341.0, 412.0; 341.9, 162.0; 343.0, 159.0; 401.1, 168.0; 414.9, 169.0; 499.1, 377.0                                                                  |
| 17 | 13.248 | 31.0, 320.0; 32.1, 553.0; 34.9, 285.0; 36.0, 987.0; 38.0, 367.0; 39.1, 2121.0; 40.0, 631.0; 41.1, 3821.0; 42.1, 373.0; 43.0, 606.0; 44.0, 520.0; 44.9, 334.0; 50.0, 405.0; 51.0, 929.0; 52.0, 512.0; 53.1, 3001.0; 53.9, 201.0; 55.1, 2417.0; 56.0, 208.0; 57.0, 219.0; 58.9, 152.0; 62.0, 174.0; 63.0, 642.0; 64.1, 246.0; 65.0, 2152.0; 66.0, 878.0; 67.1, 3152.0; 68.1, 1243.0; 69.0, 942.0; 69.8, 171.0; 73.0, 557.0; 74.1, 210.0; 75.0, 436.0; 77.1, 6299.0; 78.0, 1852.0; 79.1, 11792.0; 80.1, 2473.0; 81.1, 3123.0; 82.0, 436.0; 83.0, 299.0; 83.9, 214.0; 88.9, 494.0; 91.1, 12821.0; 92.1, 3909.0; 93.1, 8086.0; 94.1, 2845.0; 95.1, 2140.0; 96.0, 548.0; 97.0, 588.0; 98.0, 169.0; 102.1, 338.0; 103.1, 1519.0; 104.0, 952.0; 105.1, 9514.0; 106.0, 3489.0; 107.1, 4090.0; 108.1, 1886.0; 109.1, 607.0; 110.1, 283.0; 115.0, 1836.0; 116.0, 640.0; 117.0, 3844.0; 118.1, 1985.0; 119.1, 12004.0; 120.1, 2208.0; 121.0, 1268.0; 122.0, 248.0; 123.0, 201.0; 126.1, 308.0; 127.1, 300.0; 128.1, 773.0; 129.0, 912.0; 130.0, 552.0; 131.1, 4768.0; 132.1, 2012.0; 133.0, 6439.0; 134.1, 8406.0; 135.0, 3345.0; 135.9, 342.0; 136.9, 329.0; 141.0, 338.0; 142.0, 259.0; 143.0, 485.0; 144.0, 508.0; 145.1, 4365.0; 146.1, 1499.0; 147.0, 1585.0; 148.1, 416.0; 148.9, 206.0; 151.0, 3306.0; 151.9, 573.0; 152.9, 424.0; 156.0, 176.0; 156.9, 336.0; 158.1, 271.0; 159.1, 6332.0; 160.1, 1492.0; 161.1, 930.0; 162.0, 159.0; 163.1, 305.0; 164.0, 161.0; 165.0, 456.0; 173.1, 1313.0; 174.1, 3044.0; 175.0, 507.0; 176.0, 1039.0; 177.0, 4084.0; 178.0, 731.0; 179.0, 575.0; 187.1, 6279.0; 188.1, 1073.0; 189.1, 152.0; 191.0, 498.0; 191.9, 264.0; 192.9, 937.0; 194.0, 211.0; 195.0, 227.0; 201.1, 178.0; 202.1, 2140.0; 203.0, 363.0; 207.0, 1263.0; 208.0, 266.0; 208.9, 273.0; 222.9, 215.0; 234.9, 314.0; 236.9, 236.0; 250.8, 500.0; 253.0, 797.0; 254.0, 236.0; 267.0, 2444.0; 267.9, 740.0; 268.9, 531.0; 280.9, 245.0; 308.1, 159.0; 309.0, 862.0; 309.9, 269.0; 310.9, 241.0; 325.1, 223.0; 326.9, 343.0; 327.9, 196.0; 331.1, 230.0; 341.0, 386.0; 342.2, 185.0; 414.9, 195.0; 498.1, 155.0; 499.1, 324.0; 500.1, 172.0 |
| 18 | 13.545 | 31.0, 237.0; 32.0, 768.0; 34.9, 214.0; 35.9, 1040.0; 38.0, 636.0; 39.1, 2899.0; 40.0, 606.0; 41.0, 4499.0; 42.1, 581.0; 43.1, 2073.0; 44.0, 526.0; 45.0, 725.0; 50.0, 728.0; 51.0, 1896.0; 52.0, 959.0; 53.1, 3131.0; 54.0, 359.0; 55.1, 3706.0; 56.0, 264.0; 57.1, 2868.0; 58.0, 259.0; 58.9, 342.0; 60.0, 581.0; 61.0, 283.0; 62.0, 373.0; 63.0, 1239.0; 64.0, 526.0; 65.1, 3808.0; 66.1, 1177.0; 67.1, 5711.0; 68.1, 906.0; 69.1, 2657.0; 70.0, 275.0; 71.0, 424.0; 73.0, 1278.0; 74.1, 320.0; 75.1, 702.0; 77.1, 11406.0; 78.1, 3389.0; 79.1, 10679.0; 80.1, 1741.0; 81.1, 4076.0; 81.9, 434.0; 83.0, 503.0; 84.0, 213.0; 85.0, 2754.0; 85.9, 262.0; 87.0, 363.0; 87.9, 182.0; 89.0, 1161.0; 91.1, 14014.0; 92.0, 3272.0; 93.1, 9948.0; 94.1, 1888.0; 95.1, 1203.0; 95.9, 372.0; 96.8, 335.0; 98.0, 189.0; 99.0, 274.0; 100.9, 282.0; 102.0, 628.0; 103.0, 3108.0; 104.0, 2191.0; 105.0, 7804.0; 106.1, 2768.0; 107.0, 3261.0; 108.1, 1325.0; 109.1, 2255.0; 110.0, 422.0; 111.1, 448.0; 112.1, 151.0; 115.1, 2647.0; 116.1, 668.0; 117.0, 3248.0; 118.1, 6257.0; 119.1, 16416.0; 120.1, 6856.0; 121.0, 4535.0; 122.0, 1328.0; 123.0, 497.0; 124.0, 904.0; 125.0, 192.0; 126.1, 455.0; 127.1, 205.0; 128.0, 420.0; 129.0, 689.0; 130.1, 396.0; 131.1, 5398.0; 132.1, 1905.0; 133.0,                                                                                                                                                                                                                                                                                                                                                                                                                                                                                                                                                                                                                                                                                                                                                                                                                                                   |



|    |        |                                                                                                                                                                                                                                                                                                                                                                                                                                                                                                                                                                                                                                                                                                                                                                                                                                                                                                                                                                                                                                                                                                                                                                                                                                                                                                                                                                                                                                                                                                                                                                                                                                                                                                                                                                                                                                                                                                                                                                                                                                                                                                                                                                                                                                                                                                                                                                                                                                                                                                                                                                                                    |
|----|--------|----------------------------------------------------------------------------------------------------------------------------------------------------------------------------------------------------------------------------------------------------------------------------------------------------------------------------------------------------------------------------------------------------------------------------------------------------------------------------------------------------------------------------------------------------------------------------------------------------------------------------------------------------------------------------------------------------------------------------------------------------------------------------------------------------------------------------------------------------------------------------------------------------------------------------------------------------------------------------------------------------------------------------------------------------------------------------------------------------------------------------------------------------------------------------------------------------------------------------------------------------------------------------------------------------------------------------------------------------------------------------------------------------------------------------------------------------------------------------------------------------------------------------------------------------------------------------------------------------------------------------------------------------------------------------------------------------------------------------------------------------------------------------------------------------------------------------------------------------------------------------------------------------------------------------------------------------------------------------------------------------------------------------------------------------------------------------------------------------------------------------------------------------------------------------------------------------------------------------------------------------------------------------------------------------------------------------------------------------------------------------------------------------------------------------------------------------------------------------------------------------------------------------------------------------------------------------------------------------|
|    |        | 10280.0; 134.0, 3313.0; 135.0, 4814.0; 136.0, 869.0; 137.0, 1463.0; 138.0, 295.0; 139.0, 211.0; 140.9, 210.0; 142.0, 160.0; 143.0, 324.0; 145.1, 6196.0; 146.1, 3256.0; 147.1, 3599.0; 148.0, 1309.0; 149.0, 1066.0; 150.1, 2581.0; 151.0, 3572.0; 152.0, 645.0; 153.1, 362.0; 157.1, 445.0; 157.9, 165.0; 159.1, 3309.0; 160.1, 1968.0; 161.1, 2210.0; 162.1, 712.0; 163.0, 550.0; 164.0, 284.0; 165.1, 2965.0; 166.0, 408.0; 167.0, 158.0; 171.1, 176.0; 173.1, 885.0; 174.2, 1189.0; 175.0, 388.0; 176.0, 1393.0; 177.1, 7664.0; 178.0, 1500.0; 179.0, 905.0; 180.0, 254.0; 181.0, 1104.0; 182.0, 192.0; 187.1, 5986.0; 188.1, 918.0; 191.1, 748.0; 193.0, 19328.0; 194.1, 2562.0; 194.9, 408.0; 201.0, 220.0; 202.1, 2197.0; 203.2, 449.0; 204.1, 272.0; 207.1, 1709.0; 208.1, 32416.0; 209.1, 4417.0; 210.1, 464.0; 232.2, 540.0; 234.0, 156.0; 235.0, 328.0; 237.0, 156.0; 248.9, 179.0; 250.9, 503.0; 252.9, 857.0; 254.9, 173.0; 267.0, 2315.0; 268.0, 678.0; 269.0, 496.0; 280.9, 383.0; 281.9, 154.0; 308.0, 197.0; 309.0, 772.0; 310.1, 261.0; 311.0, 273.0; 325.1, 218.0; 327.0, 550.0; 331.1, 222.0; 340.9, 466.0; 342.0, 162.0; 343.0, 159.0; 346.0, 227.0; 415.0, 306.0; 499.0, 314.0; 500.0, 152.0                                                                                                                                                                                                                                                                                                                                                                                                                                                                                                                                                                                                                                                                                                                                                                                                                                                                                                                                                                                                                                                                                                                                                                                                                                                                                                                                                                                 |
| 19 | 13.598 | 31.1, 234.0; 32.0, 624.0; 35.0, 211.0; 36.0, 908.0; 38.0, 430.0; 39.0, 1012.0; 40.0, 220.0; 41.0, 1572.0; 42.1, 377.0; 43.1, 1022.0; 44.0, 522.0; 45.0, 527.0; 50.1, 206.0; 51.0, 552.0; 52.0, 201.0; 53.1, 586.0; 54.1, 218.0; 55.0, 1431.0; 56.0, 394.0; 57.1, 504.0; 57.8, 186.0; 58.9, 276.0; 60.0, 636.0; 61.0, 209.0; 63.0, 408.0; 63.9, 260.0; 65.0, 753.0; 66.0, 191.0; 67.0, 608.0; 68.1, 556.0; 69.1, 614.0; 69.9, 257.0; 71.1, 438.0; 73.1, 1307.0; 74.1, 211.0; 75.0, 532.0; 75.9, 346.0; 77.0, 2385.0; 78.0, 863.0; 79.0, 1256.0; 80.1, 353.0; 81.1, 799.0; 82.1, 333.0; 83.0, 501.0; 83.8, 316.0; 84.2, 284.0; 85.1, 463.0; 87.0, 258.0; 88.1, 153.0; 88.9, 518.0; 89.9, 264.0; 91.1, 3490.0; 91.9, 484.0; 93.0, 1671.0; 94.0, 421.0; 95.0, 476.0; 95.9, 334.0; 97.1, 362.0; 98.1, 235.0; 99.1, 202.0; 100.0, 529.0; 101.0, 320.0; 102.0, 327.0; 103.0, 969.0; 104.0, 457.0; 105.1, 3233.0; 106.0, 615.0; 107.0, 647.0; 108.0, 237.0; 109.1, 594.0; 110.0, 259.0; 110.9, 185.0; 115.1, 2444.0; 116.0, 744.0; 117.1, 1729.0; 118.1, 631.0; 119.1, 6714.0; 120.0, 932.0; 121.0, 593.0; 121.8, 183.0; 122.9, 177.0; 126.1, 355.0; 127.0, 785.0; 128.1, 2200.0; 129.1, 2703.0; 130.1, 550.0; 131.1, 1371.0; 132.0, 875.0; 133.0, 4911.0; 134.0, 878.0; 135.0, 2292.0; 136.0, 462.0; 137.0, 459.0; 138.2, 246.0; 139.1, 329.0; 140.2, 154.0; 141.0, 1239.0; 142.0, 3034.0; 143.1, 3445.0; 144.1, 725.0; 145.0, 1252.0; 146.1, 482.0; 147.1, 995.0; 148.0, 263.0; 149.1, 271.0; 151.0, 3351.0; 152.1, 1026.0; 153.0, 1091.0; 154.1, 466.0; 155.0, 1057.0; 156.1, 1742.0; 157.1, 9754.0; 158.1, 1586.0; 159.1, 1005.0; 160.0, 324.0; 160.9, 391.0; 161.9, 164.0; 163.0, 328.0; 164.0, 167.0; 165.1, 673.0; 166.1, 233.0; 167.1, 172.0; 168.0, 171.0; 169.0, 345.0; 170.1, 1138.0; 171.1, 740.0; 172.0, 203.0; 173.1, 179.0; 175.9, 1080.0; 177.0, 4115.0; 178.0, 737.0; 179.1, 608.0; 179.9, 220.0; 181.1, 1102.0; 182.1, 216.0; 183.1, 174.0; 185.1, 5208.0; 186.2, 776.0; 187.1, 1260.0; 188.1, 209.0; 191.0, 464.0; 192.0, 222.0; 192.9, 843.0; 193.9, 374.0; 195.1, 640.0; 200.1, 4924.0; 201.1, 850.0; 202.2, 1995.0; 203.1, 359.0; 207.0, 1275.0; 208.1, 489.0; 208.9, 290.0; 210.1, 757.0; 211.0, 211.0; 223.0, 194.0; 230.0, 171.0; 234.9, 476.0; 248.9, 155.0; 251.0, 558.0; 252.9, 874.0; 254.0, 268.0; 267.0, 2002.0; 267.9, 503.0; 268.9, 472.0; 280.9, 323.0; 308.1, 161.0; 309.0, 621.0; 310.0, 266.0; 311.1, 174.0; 325.0, 197.0; 326.9, 396.0; 328.1, 174.0; 329.0, 159.0; 331.1, 301.0; 340.9, 491.0; 342.0, 167.0; 343.0, 164.0; 345.9, 160.0; 415.0, 241.0; 499.2, 211.0 |
| 20 | 13.717 | 30.1, 174.0; 31.1, 264.0; 32.0, 590.0; 35.0, 217.0; 36.1, 936.0; 37.9, 436.0; 39.0, 1233.0; 40.1, 362.0; 41.1, 2615.0; 42.0, 522.0; 43.0, 2425.0; 44.0, 677.0; 45.0, 395.0; 49.9, 216.0; 51.0, 528.0; 52.1, 375.0; 53.0, 1096.0; 54.0, 180.0; 55.1, 2568.0; 56.0, 305.0; 57.0, 708.0; 58.0, 158.0; 58.9, 206.0; 59.9, 229.0; 61.0, 154.0; 63.0, 323.0; 64.1, 227.0; 65.0, 1370.0; 66.0, 403.0; 67.1, 6517.0; 68.0, 756.0; 69.1, 1503.0; 70.0, 317.0; 71.1, 614.0; 73.0, 681.0; 74.9, 494.0; 77.0, 3695.0; 78.1, 931.0; 79.1, 2336.0; 80.1, 358.0; 81.1, 2963.0; 82.0, 513.0; 83.1, 1388.0; 84.0, 690.0; 85.1, 332.0; 87.0, 161.0; 88.9, 423.0; 91.1, 4515.0; 92.1, 1013.0; 93.1, 2513.0; 94.1, 1629.0; 95.1, 665.0; 95.9, 322.0; 97.0, 367.0; 98.1, 164.0; 100.1, 284.0; 102.0, 243.0; 103.0, 673.0; 104.0, 274.0; 105.1, 1312.0; 106.2, 262.0; 107.1, 1355.0; 109.1, 28104.0; 110.1, 2767.0; 111.0, 410.0; 115.0, 1076.0; 116.1, 332.0; 117.0, 690.0; 118.0, 450.0; 119.0, 1529.0; 120.1, 504.0; 121.1, 585.0; 121.9, 264.0; 123.0, 312.0; 124.1, 197.0; 125.0, 669.0; 125.8, 401.0; 126.9, 190.0; 128.0, 501.0; 129.0, 425.0; 131.0, 265.0; 131.9, 292.0; 133.0, 4667.0; 134.0, 853.0; 135.0, 2617.0; 136.0, 443.0; 137.0, 1042.0; 138.0, 297.0; 141.0, 303.0; 142.0, 290.0; 142.9, 272.0; 144.0, 152.0; 145.1, 258.0; 146.1, 161.0; 147.2, 396.0; 148.0, 227.0; 148.9, 319.0; 151.0, 3642.0; 152.0, 986.0; 152.9, 461.0; 154.1, 249.0; 155.1, 238.0; 155.9, 157.0; 157.1, 289.0; 159.0, 257.0; 161.0, 448.0; 162.9, 264.0; 164.9, 440.0; 168.0, 158.0; 176.0, 1125.0; 177.0, 3851.0; 178.0, 745.0; 179.0, 563.0; 180.0, 655.0; 183.1, 289.0; 190.0, 183.0; 190.9, 486.0; 192.0, 169.0; 192.9, 787.0; 194.0, 212.0; 195.0, 231.0; 198.1, 167.0; 199.0, 351.0; 202.1, 808.0; 203.0, 287.0; 207.0, 1263.0; 207.9, 285.0; 209.0, 366.0; 214.0, 171.0; 218.0, 332.0; 222.9, 182.0; 235.0, 374.0; 237.0, 238.0; 250.9, 477.0; 252.9, 886.0; 253.9, 211.0; 267.0, 2346.0; 267.9, 627.0; 269.0, 531.0; 280.9, 339.0; 308.9, 830.0; 309.9, 222.0; 325.1, 166.0; 327.0, 268.0; 331.1, 330.0; 331.9, 182.0; 341.0, 471.0; 342.8, 168.0; 345.9, 167.0; 499.2, 221.0                                                                                                                                                                                                                                                                                                                                                                                                                                         |

|    |        |                                                                                                                                                                                                                                                                                                                                                                                                                                                                                                                                                                                                                                                                                                                                                                                                                                                                                                                                                                                                                                                                                                                                                                                                                                                                                                                                                                                                                                                                                                                                                                                                                                                                                                                                                                                                                                                                                                                                                                                                                                                                                                                                                                                                                                                                                                                                                                      |
|----|--------|----------------------------------------------------------------------------------------------------------------------------------------------------------------------------------------------------------------------------------------------------------------------------------------------------------------------------------------------------------------------------------------------------------------------------------------------------------------------------------------------------------------------------------------------------------------------------------------------------------------------------------------------------------------------------------------------------------------------------------------------------------------------------------------------------------------------------------------------------------------------------------------------------------------------------------------------------------------------------------------------------------------------------------------------------------------------------------------------------------------------------------------------------------------------------------------------------------------------------------------------------------------------------------------------------------------------------------------------------------------------------------------------------------------------------------------------------------------------------------------------------------------------------------------------------------------------------------------------------------------------------------------------------------------------------------------------------------------------------------------------------------------------------------------------------------------------------------------------------------------------------------------------------------------------------------------------------------------------------------------------------------------------------------------------------------------------------------------------------------------------------------------------------------------------------------------------------------------------------------------------------------------------------------------------------------------------------------------------------------------------|
|    |        | 31.0, 249.0; 32.0, 560.0; 35.0, 159.0; 36.0, 929.0; 37.9, 407.0; 39.0, 1209.0; 39.9, 219.0; 41.0, 1388.0; 42.1, 300.0; 43.1, 874.0; 44.1, 402.0; 45.0, 432.0; 50.0, 296.0; 51.1, 555.0; 52.1, 354.0; 53.0, 687.0; 53.9, 183.0; 55.1, 885.0; 56.1, 161.0; 57.1, 396.0; 58.0, 175.0; 59.0, 150.0; 61.0, 249.0; 63.0, 575.0; 64.1, 216.0; 65.0, 1252.0; 66.1, 251.0; 67.1, 732.0; 68.0, 571.0; 69.0, 489.0; 70.0, 250.0; 70.8, 230.0; 71.1, 213.0; 73.0, 647.0; 74.0, 234.0; 75.0, 505.0; 76.1, 371.0; 77.1, 2858.0; 77.9, 977.0; 79.0, 1328.0; 80.2, 260.0; 81.0, 625.0; 82.1, 429.0; 83.0, 570.0; 84.0, 379.0; 85.1, 427.0; 86.1, 151.0; 87.0, 170.0; 88.0, 163.0; 89.0, 688.0; 90.0, 299.0; 91.0, 4134.0; 92.1, 759.0; 93.0, 2563.0; 94.0, 391.0; 95.0, 560.0; 96.0, 278.0; 97.1, 232.0; 98.0, 178.0; 98.9, 173.0; 100.1, 305.0; 100.9, 207.0; 102.1, 412.0; 103.0, 1231.0; 104.0, 521.0; 105.0, 4761.0; 106.0, 744.0; 107.0, 614.0; 108.0, 290.0; 109.0, 370.0; 109.9, 199.0; 115.1, 3529.0; 116.0, 753.0; 117.0, 1755.0; 118.0, 499.0; 119.1, 3276.0; 120.0, 550.0; 121.0, 554.0; 122.0, 175.0; 126.1, 440.0; 127.1, 1082.0; 128.0, 4403.0; 129.1, 3639.0; 130.1, 597.0; 131.0, 902.0; 132.1, 1362.0; 133.0, 4836.0; 134.0, 913.0; 135.0, 2390.0; 136.0, 469.0; 137.0, 454.0; 138.9, 415.0; 140.0, 176.0; 141.1, 2288.0; 142.1, 5150.0; 143.1, 7641.0; 144.1, 1465.0; 145.0, 815.0; 146.0, 240.0; 146.9, 484.0; 149.0, 242.0; 149.9, 184.0; 151.0, 3195.0; 152.0, 1294.0; 153.1, 1339.0; 154.0, 804.0; 155.1, 1937.0; 156.1, 3130.0; 157.1, 20088.0; 158.0, 2625.0; 159.1, 579.0; 160.2, 179.0; 160.9, 441.0; 163.0, 340.0; 164.1, 172.0; 165.0, 819.0; 166.0, 207.0; 167.0, 442.0; 168.1, 355.0; 169.0, 783.0; 170.1, 2295.0; 171.1, 1443.0; 172.1, 226.0; 175.0, 155.0; 176.0, 1047.0; 177.0, 4415.0; 178.0, 777.0; 179.0, 573.0; 180.1, 218.0; 183.0, 525.0; 185.1, 10989.0; 186.1, 1796.0; 187.1, 184.0; 191.0, 517.0; 191.8, 153.0; 193.0, 886.0; 194.0, 249.0; 195.0, 184.0; 199.0, 344.0; 200.1, 11525.0; 201.1, 2059.0; 202.3, 275.0; 207.0, 1454.0; 207.9, 333.0; 208.9, 356.0; 234.8, 303.0; 251.0, 467.0; 253.0, 991.0; 253.9, 242.0; 266.9, 2254.0; 268.0, 655.0; 268.9, 568.0; 281.0, 429.0; 308.0, 218.0; 309.0, 772.0; 310.1, 177.0; 325.0, 277.0; 326.9, 299.0; 331.1, 331.0; 340.9, 412.0; 342.0, 154.0; 346.0, 204.0; 415.0, 156.0; 499.1, 250.0 |
| 21 | 13.800 | 31.0, 232.0; 31.9, 677.0; 34.9, 224.0; 36.0, 1103.0; 37.1, 178.0; 38.0, 393.0; 39.0, 1082.0; 40.1, 199.0; 41.0, 809.0; 42.0, 384.0; 43.1, 2022.0; 44.0, 616.0; 44.9, 402.0; 50.1, 297.0; 51.0, 888.0; 52.0, 355.0; 53.0, 615.0; 54.0, 190.0; 55.0, 1279.0; 56.0, 262.0; 57.1, 255.0; 59.1, 261.0; 60.0, 205.0; 61.9, 201.0; 63.0, 604.0; 64.0, 303.0; 65.0, 1478.0; 66.0, 345.0; 66.9, 371.0; 68.0, 440.0; 69.0, 407.0; 70.9, 193.0; 73.1, 717.0; 74.0, 232.0; 75.0, 510.0; 75.9, 380.0; 77.0, 2656.0; 78.0, 1575.0; 79.0, 1524.0; 80.1, 385.0; 81.0, 634.0; 82.0, 253.0; 83.0, 2998.0; 83.9, 337.0; 85.1, 699.0; 89.0, 904.0; 90.1, 791.0; 91.1, 3300.0; 92.0, 882.0; 93.0, 1142.0; 93.9, 474.0; 95.1, 365.0; 95.8, 191.0; 97.1, 272.0; 98.0, 152.0; 98.9, 350.0; 100.0, 203.0; 101.8, 162.0; 102.9, 671.0; 104.1, 339.0; 105.0, 6831.0; 106.0, 2367.0; 107.0, 4002.0; 108.0, 1688.0; 109.0, 509.0; 110.1, 263.0; 111.0, 952.0; 115.1, 829.0; 116.0, 171.0; 117.0, 566.0; 117.9, 523.0; 119.0, 2631.0; 120.1, 2926.0; 121.1, 832.0; 122.0, 313.0; 123.0, 152.0; 125.0, 343.0; 126.1, 408.0; 127.1, 176.0; 127.9, 312.0; 128.9, 381.0; 131.0, 320.0; 133.0, 5094.0; 133.9, 1069.0; 135.0, 3728.0; 135.9, 707.0; 137.0, 1318.0; 138.0, 218.0; 140.9, 215.0; 142.0, 206.0; 143.1, 409.0; 143.9, 185.0; 145.0, 345.0; 146.2, 279.0; 146.9, 507.0; 149.1, 359.0; 151.1, 38640.0; 152.1, 4161.0; 152.9, 575.0; 154.9, 200.0; 155.9, 206.0; 156.9, 513.0; 158.0, 202.0; 159.1, 254.0; 161.0, 517.0; 161.9, 223.0; 163.0, 240.0; 165.0, 415.0; 165.9, 156.0; 168.1, 177.0; 176.0, 1163.0; 177.0, 3835.0; 178.0, 652.0; 179.0, 589.0; 180.1, 314.0; 183.0, 451.0; 185.2, 267.0; 187.0, 227.0; 190.9, 478.0; 191.9, 199.0; 192.9, 862.0; 194.1, 7825.0; 195.1, 1239.0; 196.0, 162.0; 198.1, 329.0; 200.1, 220.0; 202.1, 292.0; 203.1, 216.0; 207.0, 1462.0; 208.2, 301.0; 209.0, 408.0; 235.0, 308.0; 236.9, 156.0; 248.8, 162.0; 250.9, 644.0; 252.9, 1088.0; 254.0, 223.0; 267.0, 2454.0; 267.9, 491.0; 269.0, 582.0; 281.0, 317.0; 308.0, 167.0; 309.0, 659.0; 309.9, 238.0; 310.9, 172.0; 325.0, 158.0; 326.8, 347.0; 331.0, 423.0; 332.0, 154.0; 340.9, 404.0; 342.0, 185.0; 415.0, 184.0; 499.2, 240.0                                                                                                                                                                  |
| 22 | 13.847 | 31.0, 257.0; 32.0, 612.0; 35.0, 185.0; 36.0, 947.0; 37.9, 360.0; 39.0, 916.0; 40.0, 240.0; 41.1, 1574.0; 41.9, 331.0; 43.1, 908.0; 44.0, 555.0; 45.0, 310.0; 49.9, 177.0; 51.0, 425.0; 52.1, 158.0; 53.1, 458.0; 54.0, 174.0; 55.0, 819.0; 56.2, 190.0; 57.1, 1809.0; 58.0, 252.0; 59.1, 158.0; 61.0, 237.0; 63.1, 355.0; 65.1, 877.0; 67.1, 362.0; 68.1, 468.0; 69.0, 643.0; 71.2, 156.0; 73.1, 527.0; 75.0, 484.0; 76.0, 206.0; 77.1, 1779.0; 78.0, 549.0; 79.1, 966.0; 80.0, 205.0; 81.1, 464.0; 82.0, 274.0; 83.0, 1719.0; 84.1, 219.0; 85.0, 1258.0; 85.9, 197.0; 86.9, 178.0; 89.1, 438.0; 91.0, 2889.0; 92.0, 593.0; 93.0, 964.0; 94.1, 305.0; 95.1, 435.0; 95.9, 252.0; 96.9, 332.0; 102.0, 262.0; 103.0, 976.0; 104.0, 471.0; 105.0, 3338.0; 106.0, 465.0; 107.1, 702.0; 107.9, 198.0; 109.0, 334.0; 110.1, 442.0; 111.0, 228.0; 115.1, 2031.0; 116.0, 539.0; 117.0, 2201.0; 118.1, 1844.0; 119.1, 15061.0; 120.0, 1866.0; 121.0, 762.0; 122.0, 284.0; 123.0, 153.0; 125.8, 313.0; 126.8, 315.0; 128.1, 666.0; 129.1, 564.0; 130.1, 156.0; 131.1, 374.0; 132.1, 902.0; 133.0, 5603.0; 134.0, 1101.0; 135.0, 2516.0; 136.0, 413.0; 137.0, 414.0; 140.9, 224.0; 142.0, 188.0; 143.0, 564.0; 144.0, 339.0; 145.1, 793.0; 146.0, 294.0; 147.0, 672.0; 148.0, 157.0; 148.9, 907.0; 149.9, 256.0; 151.0, 3834.0; 152.1, 692.0; 152.9, 457.0; 156.1, 274.0; 157.0, 480.0; 158.1, 557.0; 159.0, 635.0; 160.0,                                                                                                                                                                                                                                                                                                                                                                                                                                                                                                                                                                                                                                                                                                                                                                                                                                                                                                                                                       |
| 23 | 14.037 |                                                                                                                                                                                                                                                                                                                                                                                                                                                                                                                                                                                                                                                                                                                                                                                                                                                                                                                                                                                                                                                                                                                                                                                                                                                                                                                                                                                                                                                                                                                                                                                                                                                                                                                                                                                                                                                                                                                                                                                                                                                                                                                                                                                                                                                                                                                                                                      |

|    |        |                                                                                                                                                                                                                                                                                                                                                                                                                                                                                                                                                                                                                                                                                                                                                                                                                                                                                                                                                                                                                                                                                                                                                                                                                                                                                                                                                                                                                                                                                                                                                                                                                                                                                                                                                                                                                                                                                                                                                                                                                                                                                                                                                                                                                                                                                                                                                                                                                                                                                                                                                                                        |
|----|--------|----------------------------------------------------------------------------------------------------------------------------------------------------------------------------------------------------------------------------------------------------------------------------------------------------------------------------------------------------------------------------------------------------------------------------------------------------------------------------------------------------------------------------------------------------------------------------------------------------------------------------------------------------------------------------------------------------------------------------------------------------------------------------------------------------------------------------------------------------------------------------------------------------------------------------------------------------------------------------------------------------------------------------------------------------------------------------------------------------------------------------------------------------------------------------------------------------------------------------------------------------------------------------------------------------------------------------------------------------------------------------------------------------------------------------------------------------------------------------------------------------------------------------------------------------------------------------------------------------------------------------------------------------------------------------------------------------------------------------------------------------------------------------------------------------------------------------------------------------------------------------------------------------------------------------------------------------------------------------------------------------------------------------------------------------------------------------------------------------------------------------------------------------------------------------------------------------------------------------------------------------------------------------------------------------------------------------------------------------------------------------------------------------------------------------------------------------------------------------------------------------------------------------------------------------------------------------------------|
|    |        | 357.0; 161.0, 2999.0; 162.0, 518.0; 163.0, 238.0; 164.0, 165.0; 165.0, 321.0; 165.9, 208.0; 169.0, 174.0; 171.1, 213.0; 175.0, 170.0; 175.9, 1278.0; 177.0, 4257.0; 178.0, 754.0; 179.0, 543.0; 179.9, 198.0; 182.9, 284.0; 183.9, 164.0; 185.1, 366.0; 189.9, 158.0; 190.9, 525.0; 192.0, 259.0; 192.9, 964.0; 194.0, 576.0; 195.1, 273.0; 199.1, 7950.0; 200.1, 1317.0; 202.0, 194.0; 203.1, 3559.0; 204.0, 572.0; 205.1, 177.0; 207.0, 1614.0; 207.9, 312.0; 208.9, 348.0; 213.2, 177.0; 214.1, 400.0; 216.0, 269.0; 218.1, 4026.0; 219.1, 706.0; 222.9, 157.0; 235.0, 464.0; 236.9, 155.0; 250.9, 507.0; 253.0, 1006.0; 253.9, 178.0; 255.0, 187.0; 267.0, 2398.0; 268.0, 724.0; 269.0, 440.0; 281.0, 397.0; 308.0, 193.0; 309.0, 803.0; 310.1, 208.0; 324.9, 198.0; 326.9, 293.0; 329.0, 158.0; 331.1, 347.0; 340.9, 384.0; 400.9, 177.0; 499.2, 235.0                                                                                                                                                                                                                                                                                                                                                                                                                                                                                                                                                                                                                                                                                                                                                                                                                                                                                                                                                                                                                                                                                                                                                                                                                                                                                                                                                                                                                                                                                                                                                                                                                                                                                                                            |
| 24 | 14.180 | 30.1, 157.0; 31.0, 303.0; 32.0, 739.0; 34.9, 222.0; 36.0, 692.0; 37.1, 159.0; 38.0, 832.0; 39.1, 6994.0; 40.0, 1075.0; 41.1, 6368.0; 42.0, 1908.0; 43.0, 1991.0; 44.1, 629.0; 45.0, 498.0; 50.0, 1005.0; 51.1, 2825.0; 52.1, 1096.0; 53.1, 3821.0; 54.0, 910.0; 55.1, 10140.0; 56.1, 2775.0; 57.1, 997.0; 57.9, 363.0; 58.9, 286.0; 60.9, 239.0; 62.0, 664.0; 63.1, 2474.0; 64.1, 818.0; 65.1, 7346.0; 66.0, 1340.0; 67.1, 1438.0; 68.1, 883.0; 69.0, 2071.0; 70.1, 1190.0; 71.0, 1090.0; 72.9, 601.0; 73.9, 452.0; 75.0, 973.0; 76.2, 757.0; 77.1, 15766.0; 78.1, 4395.0; 79.1, 5887.0; 80.1, 872.0; 81.0, 1869.0; 82.0, 836.0; 83.1, 1682.0; 84.0, 437.0; 84.9, 595.0; 86.0, 220.0; 86.9, 334.0; 88.0, 181.0; 89.0, 2895.0; 91.1, 36112.0; 92.1, 5218.0; 93.1, 11167.0; 94.1, 1610.0; 94.9, 778.0; 96.1, 452.0; 97.0, 550.0; 98.0, 392.0; 99.1, 300.0; 101.1, 594.0; 102.1, 2184.0; 103.0, 8047.0; 104.0, 4885.0; 105.1, 30184.0; 106.1, 3441.0; 107.0, 2005.0; 108.0, 686.0; 109.1, 580.0; 110.1, 291.0; 111.1, 554.0; 115.1, 13922.0; 116.1, 4120.0; 117.1, 23736.0; 119.1, 299712.0; 120.1, 40592.0; 121.1, 4443.0; 122.0, 793.0; 123.1, 1618.0; 124.0, 553.0; 125.1, 331.0; 126.0, 597.0; 127.0, 800.0; 128.1, 1545.0; 129.1, 1041.0; 129.9, 543.0; 131.1, 5287.0; 132.1, 50880.0; 133.0, 14514.0; 134.0, 2521.0; 135.0, 3966.0; 136.0, 849.0; 137.0, 658.0; 139.1, 234.0; 141.0, 322.0; 142.0, 317.0; 143.0, 882.0; 144.1, 909.0; 145.1, 4086.0; 146.0, 850.0; 147.0, 3284.0; 148.0, 829.0; 149.1, 454.0; 149.9, 305.0; 151.0, 5079.0; 152.0, 771.0; 153.0, 444.0; 154.1, 202.0; 155.0, 152.0; 156.0, 249.0; 157.0, 485.0; 157.9, 233.0; 158.2, 243.0; 159.1, 1699.0; 160.1, 2515.0; 161.1, 10391.0; 162.1, 3634.0; 163.1, 2618.0; 164.1, 495.0; 165.0, 591.0; 166.1, 191.0; 167.1, 1580.0; 168.0, 256.0; 173.0, 1311.0; 174.1, 348.0; 175.0, 298.0; 176.0, 1088.0; 176.9, 4302.0; 178.0, 852.0; 179.0, 2783.0; 180.1, 498.0; 181.0, 152.0; 185.1, 284.0; 187.1, 383.0; 188.2, 318.0; 190.9, 464.0; 191.9, 235.0; 193.0, 1449.0; 194.1, 13215.0; 195.0, 1910.0; 195.9, 221.0; 200.1, 419.0; 201.1, 1868.0; 202.1, 1014.0; 203.1, 545.0; 206.9, 1525.0; 207.9, 319.0; 208.9, 357.0; 215.1, 611.0; 216.2, 11591.0; 217.1, 1933.0; 218.1, 581.0; 234.9, 283.0; 236.8, 197.0; 250.9, 489.0; 252.0, 168.0; 253.0, 839.0; 253.9, 311.0; 255.1, 172.0; 267.0, 2521.0; 268.0, 635.0; 269.0, 528.0; 280.9, 348.0; 307.9, 200.0; 309.0, 796.0; 309.9, 247.0; 324.9, 184.0; 327.0, 390.0; 328.1, 151.0; 331.1, 390.0; 341.0, 547.0; 341.9, 201.0; 346.1, 215.0; 414.9, 150.0; 499.1, 243.0 |
| 25 | 14.809 | 31.1, 371.0; 32.0, 569.0; 35.0, 243.0; 36.0, 818.0; 37.0, 179.0; 38.0, 986.0; 39.1, 14943.0; 40.1, 2006.0; 41.1, 14822.0; 42.1, 1495.0; 43.1, 6661.0; 44.0, 769.0; 44.9, 563.0; 49.1, 155.0; 50.0, 1685.0; 51.0, 5518.0; 52.1, 2465.0; 53.1, 12535.0; 54.1, 2492.0; 55.1, 40328.0; 56.1, 2121.0; 57.0, 1279.0; 57.9, 515.0; 59.0, 470.0; 61.0, 193.0; 62.1, 441.0; 63.1, 2939.0; 64.0, 1004.0; 65.1, 10990.0; 66.0, 2042.0; 67.0, 5008.0; 68.1, 989.0; 69.1, 3319.0; 70.1, 506.0; 71.0, 658.0; 73.0, 826.0; 74.1, 351.0; 75.1, 1048.0; 77.1, 37808.0; 78.1, 9777.0; 79.1, 27920.0; 80.1, 2990.0; 81.1, 6956.0; 83.1, 121704.0; 84.1, 7165.0; 85.1, 19440.0; 86.1, 1186.0; 87.1, 346.0; 87.8, 242.0; 89.0, 1898.0; 91.1, 62384.0; 92.1, 15241.0; 93.1, 37912.0; 94.1, 4218.0; 95.1, 2473.0; 95.8, 604.0; 97.0, 499.0; 98.1, 2299.0; 99.1, 17576.0; 100.0, 1537.0; 101.2, 385.0; 102.1, 1399.0; 103.1, 11189.0; 105.1, 321152.0; 106.1, 30952.0; 107.1, 8984.0; 108.1, 1336.0; 109.1, 3575.0; 110.0, 761.0; 111.1, 7522.0; 112.0, 655.0; 113.0, 266.0; 115.1, 7378.0; 116.1, 1892.0; 117.1, 10237.0; 119.1, 187968.0; 120.1, 145984.0; 121.1, 55312.0; 122.1, 5179.0; 123.1, 1292.0; 124.0, 193.0; 125.1, 617.0; 126.1, 2722.0; 127.0, 806.0; 128.1, 2330.0; 129.1, 2342.0; 130.0, 668.0; 131.1, 1812.0; 132.1, 3213.0; 133.0, 8793.0; 134.1, 7964.0; 135.1, 8045.0; 136.0, 1365.0; 137.0, 924.0; 137.9, 186.0; 139.2, 243.0; 141.0, 945.0; 142.0, 1328.0; 143.1, 3413.0; 144.1, 1579.0; 145.1, 1765.0; 146.1, 619.0; 147.1, 4671.0; 148.1, 872.0; 149.0, 1615.0; 150.1, 431.0; 151.0, 3668.0; 152.0, 806.0; 153.0, 670.0; 154.0, 352.0; 155.1, 480.0; 156.1, 1115.0; 157.1, 8203.0; 158.1, 1538.0; 159.0, 994.0; 160.1, 601.0; 161.1, 4945.0; 162.1, 4917.0; 163.1, 1057.0; 164.2, 202.0; 165.0, 486.0; 167.0, 318.0; 168.0, 200.0; 169.1, 237.0; 170.1, 601.0; 171.0, 661.0; 172.0, 269.0; 173.0, 533.0; 173.9, 210.0; 175.1, 1139.0; 176.0, 1754.0; 177.0, 4333.0; 177.9, 870.0; 178.9, 823.0; 180.0, 275.0; 181.0, 211.0; 183.1, 171.0; 184.0, 213.0; 185.1, 6543.0; 186.1, 963.0; 187.0, 272.0; 189.1, 237.0; 190.2, 158.0; 191.1, 547.0; 192.1, 165.0; 193.0, 1041.0; 194.1, 1023.0; 194.9, 312.0; 199.0, 230.0; 200.1, 7867.0; 201.1, 2008.0; 202.0, 340.0; 203.1, 9254.0; 204.2, 1575.0; 205.1, 244.0; 207.0, 1732.0; 208.0, 618.0; 209.0, 470.0; 216.1, 1033.0; 218.2, 46464.0; 219.2, 7919.0; 220.1, 1013.0; 221.1, 330.0; 223.0, 248.0; 234.9, 397.0; 251.0, 701.0; 253.0, 1250.0; 253.9, 280.0; 255.1, 215.0; 267.0, 2360.0; 267.9, 589.0; 268.9,                            |

|    |        |                                                                                                                                                                                                                                                                                                                                                                                                                                                                                                                                                                                                                                                                                                                                                                                                                                                                                                                                                                                                                                                                                                                                                                                                                                                                                                                                                                                                                                                                                                                                                                                                                                                                                                                                                                                                                                                                                                                                                                                                                                                                                                                                                                                                                                                                                                                                                                                                                                                                                                                                                                                                                                                                                                                                                                                                                                                                                                                                         |
|----|--------|-----------------------------------------------------------------------------------------------------------------------------------------------------------------------------------------------------------------------------------------------------------------------------------------------------------------------------------------------------------------------------------------------------------------------------------------------------------------------------------------------------------------------------------------------------------------------------------------------------------------------------------------------------------------------------------------------------------------------------------------------------------------------------------------------------------------------------------------------------------------------------------------------------------------------------------------------------------------------------------------------------------------------------------------------------------------------------------------------------------------------------------------------------------------------------------------------------------------------------------------------------------------------------------------------------------------------------------------------------------------------------------------------------------------------------------------------------------------------------------------------------------------------------------------------------------------------------------------------------------------------------------------------------------------------------------------------------------------------------------------------------------------------------------------------------------------------------------------------------------------------------------------------------------------------------------------------------------------------------------------------------------------------------------------------------------------------------------------------------------------------------------------------------------------------------------------------------------------------------------------------------------------------------------------------------------------------------------------------------------------------------------------------------------------------------------------------------------------------------------------------------------------------------------------------------------------------------------------------------------------------------------------------------------------------------------------------------------------------------------------------------------------------------------------------------------------------------------------------------------------------------------------------------------------------------------------|
|    |        | 536.0; 281.0, 718.0; 281.9, 230.0; 307.8, 230.0; 309.0, 799.0; 310.0, 220.0; 311.0, 226.0; 325.0, 208.0; 327.0, 404.0; 331.1, 463.0; 332.1, 204.0; 341.0, 414.0; 342.0, 243.0; 345.9, 207.0; 355.0, 786.0; 356.1, 261.0; 357.0, 201.0; 401.0, 326.0; 401.9, 150.0; 405.1, 189.0; 415.1, 177.0; 499.1, 177.0                                                                                                                                                                                                                                                                                                                                                                                                                                                                                                                                                                                                                                                                                                                                                                                                                                                                                                                                                                                                                                                                                                                                                                                                                                                                                                                                                                                                                                                                                                                                                                                                                                                                                                                                                                                                                                                                                                                                                                                                                                                                                                                                                                                                                                                                                                                                                                                                                                                                                                                                                                                                                             |
| 26 | 14.892 | 30.1, 845.0; 31.1, 504.0; 32.0, 407.0; 35.1, 156.0; 36.0, 696.0; 37.0, 548.0; 38.1, 3050.0; 39.1, 50072.0; 40.1, 5890.0; 41.1, 35440.0; 42.1, 4221.0; 43.1, 12401.0; 44.1, 708.0; 45.0, 605.0; 50.1, 5935.0; 51.1, 17640.0; 52.1, 6590.0; 53.1, 33336.0; 54.2, 8183.0; 55.1, 158464.0; 56.1, 7959.0; 57.1, 3351.0; 57.9, 1236.0; 59.0, 1231.0; 60.1, 173.0; 61.1, 615.0; 62.0, 3398.0; 63.1, 16656.0; 64.1, 5370.0; 65.1, 42440.0; 66.1, 4393.0; 67.1, 6511.0; 68.1, 1189.0; 69.1, 5845.0; 70.1, 736.0; 71.0, 972.0; 72.1, 295.0; 73.0, 656.0; 74.1, 2158.0; 75.1, 4536.0; 76.1, 5052.0; 77.1, 69432.0; 78.1, 21792.0; 79.1, 25432.0; 80.1, 2708.0; 81.1, 7365.0; 83.1, 965824.0; 84.1, 51520.0; 85.1, 7359.0; 86.0, 1766.0; 87.0, 2089.0; 88.1, 1495.0; 89.1, 17616.0; 91.1, 181888.0; 92.1, 22512.0; 93.1, 33208.0; 94.1, 3565.0; 95.1, 2339.0; 96.1, 1266.0; 97.1, 4228.0; 98.1, 56808.0; 99.1, 5223.0; 100.2, 595.0; 101.0, 2820.0; 102.1, 14242.0; 103.1, 43104.0; 104.1, 27032.0; 105.1, 148736.0; 106.1, 13435.0; 107.1, 4013.0; 108.0, 2533.0; 109.1, 14682.0; 110.1, 1708.0; 111.1, 7200.0; 112.1, 687.0; 113.1, 1195.0; 115.1, 105096.0; 116.1, 29472.0; 117.1, 174400.0; 118.1, 89128.0; 119.1, 795136.0; 120.1, 82944.0; 121.1, 6034.0; 122.0, 641.0; 123.1, 840.0; 124.0, 635.0; 125.1, 2806.0; 126.1, 2399.0; 127.1, 6049.0; 128.1, 15657.0; 129.1, 11177.0; 130.1, 4764.0; 131.1, 24464.0; 132.1, 239744.0; 133.1, 70968.0; 134.1, 7661.0; 135.0, 4919.0; 136.1, 757.0; 137.1, 598.0; 138.1, 359.0; 139.1, 1087.0; 141.1, 6894.0; 142.1, 7384.0; 143.1, 10381.0; 144.1, 3758.0; 145.1, 35600.0; 146.1, 5480.0; 147.1, 2205.0; 148.1, 8234.0; 149.1, 1320.0; 150.0, 347.0; 151.0, 3480.0; 152.0, 2905.0; 153.0, 4507.0; 154.1, 1475.0; 155.1, 8028.0; 156.1, 3668.0; 157.1, 9162.0; 158.1, 8465.0; 159.1, 35880.0; 160.1, 6000.0; 161.1, 5964.0; 162.1, 1103.0; 163.0, 568.0; 164.0, 376.0; 165.1, 2857.0; 166.1, 1700.0; 167.1, 2965.0; 168.1, 9942.0; 169.1, 2706.0; 170.1, 1259.0; 171.1, 4598.0; 172.1, 5507.0; 173.1, 34888.0; 174.1, 5185.0; 175.1, 1303.0; 175.9, 1101.0; 177.0, 3382.0; 178.0, 899.0; 179.0, 767.0; 180.1, 256.0; 181.1, 1226.0; 182.1, 964.0; 183.1, 14721.0; 184.1, 2306.0; 185.1, 3209.0; 186.1, 5619.0; 187.1, 1518.0; 188.1, 338.0; 189.0, 254.0; 191.0, 576.0; 193.0, 928.0; 194.1, 791.0; 195.0, 343.0; 197.0, 650.0; 198.1, 1234.0; 199.1, 2543.0; 201.1, 297984.0; 202.1, 42976.0; 203.1, 4247.0; 204.1, 499.0; 207.0, 1443.0; 208.0, 498.0; 209.0, 346.0; 213.2, 231.0; 214.1, 1097.0; 216.2, 421440.0; 217.2, 66168.0; 218.1, 6204.0; 219.1, 524.0; 220.2, 179.0; 222.9, 180.0; 235.0, 504.0; 249.1, 167.0; 251.0, 383.0; 253.0, 1072.0; 254.0, 300.0; 254.8, 159.0; 267.0, 2022.0; 268.0, 539.0; 269.0, 650.0; 281.0, 440.0; 308.0, 232.0; 309.0, 653.0; 309.9, 300.0; 325.0, 156.0; 327.0, 381.0; 331.0, 329.0; 340.9, 462.0; 346.1, 160.0; 355.1, 176.0; 405.0, 167.0; 499.0, 157.0 |
| 27 | 14.934 | 30.1, 909.0; 31.0, 571.0; 32.0, 408.0; 36.0, 610.0; 37.1, 571.0; 38.1, 3440.0; 39.1, 60520.0; 40.1, 7861.0; 41.1, 41432.0; 42.1, 7609.0; 43.1, 28256.0; 44.0, 1381.0; 45.0, 1223.0; 46.0, 163.0; 48.8, 167.0; 50.1, 5140.0; 51.1, 23608.0; 52.1, 9969.0; 53.1, 47040.0; 54.2, 10362.0; 55.1, 167936.0; 56.1, 10722.0; 57.1, 4827.0; 58.0, 979.0; 59.1, 1358.0; 59.9, 164.0; 61.0, 407.0; 62.1, 2122.0; 63.1, 9120.0; 64.1, 3152.0; 65.1, 45960.0; 66.1, 7718.0; 67.1, 16114.0; 68.1, 3274.0; 69.1, 14411.0; 70.0, 2865.0; 71.1, 2658.0; 72.0, 460.0; 73.0, 552.0; 74.0, 1016.0; 75.1, 1960.0; 77.1, 210176.0; 78.1, 45168.0; 79.1, 49032.0; 80.1, 6912.0; 81.1, 13629.0; 83.1, 774592.0; 84.1, 45400.0; 85.1, 96088.0; 86.1, 5557.0; 87.1, 1021.0; 89.1, 6410.0; 91.1, 284096.0; 92.1, 67344.0; 93.1, 156608.0; 94.1, 14268.0; 95.1, 8634.0; 96.1, 2199.0; 97.1, 2055.0; 98.1, 15447.0; 99.1, 43600.0; 100.1, 3686.0; 101.0, 853.0; 102.1, 3098.0; 103.1, 20976.0; 105.1, 832768.0; 106.1, 75032.0; 107.1, 10280.0; 108.1, 2396.0; 109.1, 6558.0; 111.1, 259264.0; 112.1, 18664.0; 113.1, 1396.0; 115.1, 16432.0; 116.1, 4417.0; 117.1, 25936.0; 119.1, 377664.0; 120.1, 448960.0; 121.1, 54040.0; 122.1, 3708.0; 123.0, 2736.0; 124.1, 720.0; 125.1, 7928.0; 126.1, 52992.0; 127.1, 5740.0; 128.1, 4199.0; 129.1, 4047.0; 130.1, 921.0; 131.1, 2978.0; 132.1, 12816.0; 133.1, 14628.0; 134.1, 13706.0; 135.0, 7766.0; 136.0, 928.0; 137.0, 1004.0; 138.1, 447.0; 139.0, 342.0; 141.1, 1592.0; 142.1, 2998.0; 143.1, 7299.0; 144.1, 4535.0; 145.1, 4084.0; 146.2, 810.0; 147.1, 11285.0; 148.1, 1767.0; 149.1, 1308.0; 150.1, 931.0; 151.0, 2960.0; 152.1, 1020.0; 153.1, 1096.0; 154.0, 477.0; 155.1, 1004.0; 156.1, 2340.0; 157.1, 30896.0; 158.1, 4401.0; 159.0, 2325.0; 160.1, 885.0; 161.1, 14286.0; 162.1, 23640.0; 163.1, 3946.0; 164.0, 577.0; 165.0, 807.0; 166.0, 271.0; 167.0, 359.0; 168.1, 371.0; 169.1, 606.0; 170.1, 1239.0; 171.1, 1869.0; 172.1, 523.0; 173.1, 1230.0; 174.0, 402.0; 175.1, 1309.0; 176.0, 1862.0; 177.0, 3774.0; 178.1, 719.0; 179.0, 690.0; 179.9, 191.0; 180.9, 206.0; 183.1, 498.0; 185.1, 19904.0; 186.1, 3279.0; 187.0, 705.0; 189.1, 472.0; 190.0, 222.0; 190.2, 223.0; 191.0, 385.0; 193.0, 953.0; 194.0, 642.0; 195.0, 215.0; 200.2, 46296.0; 201.1, 11211.0; 203.1, 34328.0; 204.2, 5151.0; 205.1, 598.0; 207.0, 1360.0; 208.0, 503.0; 208.9, 383.0; 216.1, 4790.0; 218.2, 42776.0; 219.1, 7153.0; 220.1, 766.0; 222.9, 188.0; 235.0, 391.0; 250.9, 386.0; 253.0, 981.0; 254.0, 234.0; 267.0, 1956.0; 268.0, 489.0; 269.0, 533.0; 281.0, 341.0; 282.1, 152.0; 308.0, 163.0; 309.1, 634.0; 310.1, 179.0; 310.9, 197.0; 325.0, 243.0; 326.9, 314.0; 331.0, 392.0; 340.9, 369.0; 341.9, 176.0; 415.1, 154.0; 499.2, 186.0                                                                                                                                                                       |

|    |        |                                                                                                                                                                                                                                                                                                                                                                                                                                                                                                                                                                                                                                                                                                                                                                                                                                                                                                                                                                                                                                                                                                                                                                                                                                                                                                                                                                                                                                                                                                                                                                                                                                                                                                                                                                                                                                                                                                                                                                                                                                                                                                                                                                                                                                                                                                                                                                                                                                                                                                                                                                                                                                          |
|----|--------|------------------------------------------------------------------------------------------------------------------------------------------------------------------------------------------------------------------------------------------------------------------------------------------------------------------------------------------------------------------------------------------------------------------------------------------------------------------------------------------------------------------------------------------------------------------------------------------------------------------------------------------------------------------------------------------------------------------------------------------------------------------------------------------------------------------------------------------------------------------------------------------------------------------------------------------------------------------------------------------------------------------------------------------------------------------------------------------------------------------------------------------------------------------------------------------------------------------------------------------------------------------------------------------------------------------------------------------------------------------------------------------------------------------------------------------------------------------------------------------------------------------------------------------------------------------------------------------------------------------------------------------------------------------------------------------------------------------------------------------------------------------------------------------------------------------------------------------------------------------------------------------------------------------------------------------------------------------------------------------------------------------------------------------------------------------------------------------------------------------------------------------------------------------------------------------------------------------------------------------------------------------------------------------------------------------------------------------------------------------------------------------------------------------------------------------------------------------------------------------------------------------------------------------------------------------------------------------------------------------------------------------|
| 28 | 15.130 | 31.1, 243.0; 32.0, 524.0; 34.9, 152.0; 36.0, 787.0; 37.9, 426.0; 39.0, 967.0; 40.1, 302.0; 41.1, 3641.0; 42.1, 726.0; 43.1, 2760.0; 44.0, 671.0; 45.0, 449.0; 49.9, 203.0; 51.1, 402.0; 52.1, 182.0; 53.0, 852.0; 54.1, 1362.0; 55.1, 3040.0; 56.1, 971.0; 57.1, 2434.0; 58.0, 251.0; 59.0, 242.0; 59.9, 157.0; 63.0, 353.0; 65.0, 863.0; 66.0, 384.0; 67.1, 835.0; 68.0, 726.0; 69.1, 2117.0; 70.1, 1479.0; 71.1, 1031.0; 72.1, 155.0; 73.0, 779.0; 74.0, 169.0; 74.9, 388.0; 76.1, 200.0; 77.0, 1860.0; 78.1, 717.0; 79.0, 1440.0; 80.1, 436.0; 81.0, 883.0; 82.1, 2710.0; 83.0, 5260.0; 84.1, 1043.0; 85.0, 699.0; 86.0, 198.0; 89.0, 436.0; 90.0, 174.0; 91.0, 2158.0; 92.1, 411.0; 93.1, 1142.0; 94.0, 790.0; 95.1, 757.0; 96.1, 4052.0; 97.0, 5010.0; 98.1, 1112.0; 99.0, 357.0; 102.1, 228.0; 103.0, 836.0; 104.1, 430.0; 105.1, 1868.0; 106.1, 446.0; 106.9, 793.0; 107.9, 488.0; 109.0, 735.0; 110.1, 4606.0; 111.1, 2356.0; 112.0, 637.0; 112.9, 164.0; 113.9, 166.0; 115.0, 1082.0; 116.0, 333.0; 117.0, 1930.0; 118.1, 673.0; 119.0, 3281.0; 120.0, 884.0; 121.0, 1358.0; 122.0, 611.0; 123.1, 371.0; 124.1, 2855.0; 125.1, 826.0; 126.0, 733.0; 127.0, 299.0; 127.9, 309.0; 129.0, 256.0; 131.1, 417.0; 132.0, 788.0; 133.0, 4883.0; 134.0, 947.0; 135.0, 3021.0; 136.0, 623.0; 137.1, 755.0; 138.1, 1958.0; 139.0, 418.0; 140.1, 231.0; 141.0, 336.0; 142.0, 182.0; 143.1, 167.0; 143.9, 154.0; 145.1, 472.0; 146.0, 205.0; 147.0, 656.0; 148.0, 312.0; 149.1, 900.0; 150.1, 589.0; 151.0, 3652.0; 152.1, 2328.0; 153.0, 708.0; 154.1, 361.0; 157.1, 262.0; 157.9, 178.0; 159.0, 375.0; 161.0, 788.0; 162.0, 364.0; 163.1, 486.0; 164.1, 1024.0; 165.0, 1126.0; 166.1, 2185.0; 167.1, 644.0; 168.1, 354.0; 170.9, 231.0; 171.9, 162.0; 173.1, 253.0; 175.0, 154.0; 176.0, 1279.0; 177.0, 4043.0; 178.0, 809.0; 179.0, 927.0; 180.1, 1864.0; 181.1, 537.0; 182.9, 170.0; 188.9, 192.0; 191.0, 618.0; 192.0, 427.0; 193.1, 953.0; 194.2, 825.0; 195.1, 9148.0; 196.1, 1332.0; 197.0, 264.0; 199.1, 1607.0; 200.1, 323.0; 201.1, 869.0; 202.2, 265.0; 205.0, 177.0; 207.0, 1645.0; 208.0, 435.0; 209.0, 425.0; 210.1, 180.0; 214.1, 357.0; 216.1, 895.0; 217.0, 248.0; 218.1, 236.0; 223.0, 178.0; 224.1, 2368.0; 225.0, 398.0; 234.1, 269.0; 234.9, 394.0; 236.9, 186.0; 250.1, 156.0; 250.9, 527.0; 252.9, 1081.0; 254.0, 314.0; 254.9, 160.0; 267.0, 2057.0; 267.9, 730.0; 269.0, 595.0; 281.0, 463.0; 309.0, 746.0; 309.9, 243.0; 311.0, 194.0; 324.9, 180.0; 326.9, 413.0; 328.9, 157.0; 331.1, 373.0; 341.0, 341.0; 341.9, 201.0; 343.1, 158.0; 345.9, 256.0; 400.9, 158.0; 499.0, 236.0                                |
|    |        | 31.1, 187.0; 32.0, 969.0; 35.0, 208.0; 36.0, 744.0; 38.0, 361.0; 39.1, 1291.0; 39.9, 350.0; 41.0, 2046.0; 42.0, 314.0; 43.1, 1369.0; 44.0, 593.0; 45.1, 424.0; 50.0, 284.0; 51.0, 659.0; 52.0, 362.0; 53.0, 1121.0; 54.0, 400.0; 55.1, 2608.0; 56.1, 307.0; 57.0, 435.0; 58.0, 232.0; 59.0, 265.0; 60.9, 177.0; 63.0, 446.0; 64.0, 208.0; 65.0, 1163.0; 65.9, 285.0; 67.1, 1293.0; 68.1, 520.0; 69.1, 1494.0; 70.1, 245.0; 71.0, 511.0; 73.0, 623.0; 73.9, 198.0; 75.0, 501.0; 75.9, 239.0; 77.1, 3311.0; 78.1, 753.0; 79.1, 1957.0; 80.1, 490.0; 81.0, 1002.0; 82.2, 853.0; 83.1, 9123.0; 84.0, 805.0; 85.0, 522.0; 86.9, 191.0; 88.9, 504.0; 91.0, 4302.0; 92.0, 927.0; 93.1, 2693.0; 94.0, 894.0; 95.1, 1217.0; 96.0, 516.0; 96.9, 382.0; 98.1, 355.0; 99.0, 472.0; 102.0, 191.0; 103.0, 1085.0; 104.0, 449.0; 105.0, 5221.0; 106.1, 823.0; 107.1, 1375.0; 108.0, 571.0; 109.1, 2263.0; 110.1, 311.0; 111.0, 462.0; 114.0, 216.0; 115.1, 1894.0; 116.0, 542.0; 117.0, 1789.0; 118.0, 690.0; 119.1, 7005.0; 120.1, 3035.0; 121.0, 2043.0; 122.0, 679.0; 123.1, 789.0; 123.9, 265.0; 125.1, 346.0; 126.1, 477.0; 127.1, 467.0; 128.0, 1078.0; 129.0, 1150.0; 130.2, 386.0; 131.0, 2068.0; 132.1, 1088.0; 133.0, 5412.0; 134.0, 1381.0; 135.0, 3916.0; 135.9, 591.0; 136.9, 547.0; 138.1, 165.0; 139.1, 284.0; 141.1, 777.0; 142.0, 464.0; 143.1, 699.0; 144.1, 593.0; 145.1, 3171.0; 146.1, 968.0; 147.1, 3819.0; 148.1, 945.0; 148.9, 468.0; 151.0, 3368.0; 152.0, 701.0; 153.0, 500.0; 155.0, 335.0; 156.0, 295.0; 157.1, 636.0; 158.1, 773.0; 159.1, 3818.0; 160.0, 1148.0; 161.1, 1314.0; 162.1, 469.0; 163.0, 378.0; 164.1, 260.0; 165.0, 428.0; 166.0, 193.0; 167.1, 316.0; 168.0, 177.0; 169.0, 186.0; 171.1, 291.0; 172.1, 364.0; 173.1, 3533.0; 174.0, 1016.0; 175.0, 399.0; 176.0, 991.0; 177.0, 4176.0; 178.0, 710.0; 179.0, 582.0; 180.0, 248.0; 183.1, 299.0; 185.0, 359.0; 186.0, 438.0; 187.0, 323.0; 188.1, 387.0; 189.1, 210.0; 191.0, 596.0; 192.1, 319.0; 193.0, 970.0; 194.0, 631.0; 195.0, 1036.0; 196.0, 161.0; 198.9, 583.0; 200.2, 436.0; 201.1, 3716.0; 202.1, 667.0; 203.1, 450.0; 204.1, 396.0; 206.0, 177.0; 207.0, 1760.0; 208.0, 501.0; 209.0, 442.0; 214.0, 166.0; 216.1, 6815.0; 217.1, 1181.0; 218.2, 274.0; 223.0, 205.0; 224.1, 245.0; 234.1, 175.0; 235.0, 410.0; 236.1, 176.0; 237.0, 230.0; 251.0, 637.0; 252.9, 863.0; 253.8, 180.0; 267.0, 2414.0; 268.0, 708.0; 268.9, 536.0; 281.1, 407.0; 281.8, 160.0; 308.0, 183.0; 309.0, 671.0; 309.9, 220.0; 311.0, 196.0; 325.1, 182.0; 326.9, 521.0; 328.1, 173.0; 328.9, 154.0; 331.0, 322.0; 340.9, 478.0; 405.1, 206.0; 414.8, 151.0; 499.1, 259.0 |
| 30 | 15.236 | 31.0, 254.0; 32.1, 551.0; 34.9, 214.0; 36.0, 769.0; 38.0, 516.0; 39.0, 1423.0; 40.0, 247.0; 41.1, 1295.0; 42.1, 314.0; 43.0, 930.0; 44.0, 467.0; 44.9, 451.0; 50.0, 316.0; 51.1, 789.0; 51.9, 334.0; 53.1, 692.0; 54.1, 194.0; 55.0, 1459.0; 55.9, 232.0; 57.1, 353.0; 58.0, 206.0; 59.0, 209.0; 60.9, 193.0; 62.2, 202.0; 63.1, 817.0; 64.0, 419.0; 65.1, 1089.0; 66.1, 235.0; 67.0, 682.0; 67.9, 409.0; 68.9, 692.0; 70.0, 289.0; 70.9, 314.0; 71.9, 221.0; 73.0, 722.0; 74.0, 269.0; 75.1, 505.0; 76.0, 780.0; 77.0, 2908.0; 78.1, 731.0; 79.1, 1292.0; 79.9, 369.0; 81.1, 633.0; 81.9, 437.0; 83.0, 3304.0; 84.0, 586.0; 84.9, 895.0; 86.9, 261.0; 87.9, 189.0; 89.0, 770.0; 90.0, 336.0; 91.0, 3732.0; 92.0, 1163.0; 93.0, 1181.0; 94.0, 325.0; 95.1, 516.0;                                                                                                                                                                                                                                                                                                                                                                                                                                                                                                                                                                                                                                                                                                                                                                                                                                                                                                                                                                                                                                                                                                                                                                                                                                                                                                                                                                                                                                                                                                                                                                                                                                                                                                                                                                                                                                                                        |
|    |        |                                                                                                                                                                                                                                                                                                                                                                                                                                                                                                                                                                                                                                                                                                                                                                                                                                                                                                                                                                                                                                                                                                                                                                                                                                                                                                                                                                                                                                                                                                                                                                                                                                                                                                                                                                                                                                                                                                                                                                                                                                                                                                                                                                                                                                                                                                                                                                                                                                                                                                                                                                                                                                          |

|    |        |                                                                                                                                                                                                                                                                                                                                                                                                                                                                                                                                                                                                                                                                                                                                                                                                                                                                                                                                                                                                                                                                                                                                                                                                                                                                                                                                                                                                                                                                                                                                                                                                                                                                                                                                                                                                                                                                                                                                                                                                                                                                                                                                                                                                                                                                                                                                                                                                                                                                                                                                                                                                                                                                                                                                                                                    |
|----|--------|------------------------------------------------------------------------------------------------------------------------------------------------------------------------------------------------------------------------------------------------------------------------------------------------------------------------------------------------------------------------------------------------------------------------------------------------------------------------------------------------------------------------------------------------------------------------------------------------------------------------------------------------------------------------------------------------------------------------------------------------------------------------------------------------------------------------------------------------------------------------------------------------------------------------------------------------------------------------------------------------------------------------------------------------------------------------------------------------------------------------------------------------------------------------------------------------------------------------------------------------------------------------------------------------------------------------------------------------------------------------------------------------------------------------------------------------------------------------------------------------------------------------------------------------------------------------------------------------------------------------------------------------------------------------------------------------------------------------------------------------------------------------------------------------------------------------------------------------------------------------------------------------------------------------------------------------------------------------------------------------------------------------------------------------------------------------------------------------------------------------------------------------------------------------------------------------------------------------------------------------------------------------------------------------------------------------------------------------------------------------------------------------------------------------------------------------------------------------------------------------------------------------------------------------------------------------------------------------------------------------------------------------------------------------------------------------------------------------------------------------------------------------------------|
|    |        | 96.0, 336.0; 97.1, 627.0; 98.0, 541.0; 99.3, 447.0; 101.0, 238.0; 101.9, 445.0; 103.0, 1105.0; 104.0, 337.0; 105.0, 2724.0; 106.0, 704.0; 107.1, 1019.0; 108.0, 227.0; 109.0, 1065.0; 109.9, 240.0; 110.9, 253.0; 112.1, 164.0; 113.0, 220.0; 114.2, 360.0; 115.1, 3991.0; 116.1, 974.0; 117.0, 959.0; 118.0, 413.0; 119.1, 3027.0; 119.9, 1002.0; 121.0, 1166.0; 122.0, 313.0; 122.9, 216.0; 124.0, 169.0; 125.0, 863.0; 126.0, 577.0; 127.0, 1203.0; 128.1, 2797.0; 129.1, 1845.0; 129.9, 327.0; 131.1, 945.0; 132.0, 941.0; 133.0, 4637.0; 134.1, 875.0; 135.0, 2725.0; 136.0, 573.0; 137.1, 498.0; 138.0, 182.0; 139.1, 879.0; 140.1, 296.0; 141.1, 1754.0; 142.0, 655.0; 143.1, 681.0; 144.1, 686.0; 145.0, 1093.0; 146.1, 402.0; 147.1, 706.0; 147.9, 240.0; 148.9, 400.0; 151.0, 3447.0; 152.0, 1464.0; 153.1, 1740.0; 154.0, 666.0; 155.1, 1098.0; 156.1, 1149.0; 157.1, 955.0; 158.1, 1764.0; 159.0, 1843.0; 160.0, 377.0; 161.1, 489.0; 162.2, 221.0; 163.1, 243.0; 164.1, 313.0; 165.0, 2562.0; 166.0, 1359.0; 167.0, 575.0; 168.0, 1267.0; 169.1, 1789.0; 169.9, 396.0; 171.1, 2072.0; 172.0, 595.0; 173.0, 300.0; 176.0, 1029.0; 177.0, 4324.0; 177.9, 1049.0; 179.0, 1047.0; 180.1, 338.0; 181.1, 1187.0; 182.1, 1321.0; 183.1, 3701.0; 184.0, 2225.0; 185.1, 897.0; 186.0, 199.0; 191.0, 578.0; 192.0, 251.0; 193.0, 1013.0; 194.0, 813.0; 195.0, 744.0; 195.9, 222.0; 197.1, 1418.0; 199.1, 88664.0; 200.1, 13199.0; 201.1, 1763.0; 201.9, 188.0; 203.9, 187.0; 207.0, 1893.0; 208.0, 588.0; 208.9, 335.0; 211.1, 194.0; 212.1, 478.0; 213.1, 3375.0; 214.1, 5076.0; 215.1, 896.0; 216.1, 865.0; 217.1, 168.0; 218.1, 182.0; 222.9, 151.0; 235.0, 438.0; 236.0, 159.0; 236.9, 243.0; 249.0, 157.0; 250.9, 491.0; 253.0, 537.0; 253.9, 163.0; 267.0, 2299.0; 268.0, 622.0; 269.0, 436.0; 281.0, 391.0; 282.0, 180.0; 282.9, 153.0; 308.9, 836.0; 309.9, 269.0; 311.0, 250.0; 325.1, 207.0; 327.0, 481.0; 328.0, 160.0; 331.0, 255.0; 341.0, 503.0; 343.0, 189.0; 415.0, 216.0; 499.0, 154.0                                                                                                                                                                                                                                                                                                                                                                                                                                                                                                                                                                                                                                                                                                                                                                         |
| 31 | 15.296 | 30.1, 994.0; 31.0, 676.0; 32.0, 476.0; 36.0, 611.0; 37.0, 581.0; 38.1, 3193.0; 39.1, 58096.0; 40.1, 8390.0; 41.1, 39368.0; 42.1, 5406.0; 43.1, 11960.0; 44.0, 692.0; 45.0, 894.0; 48.9, 168.0; 50.1, 4509.0; 51.1, 17608.0; 52.1, 9622.0; 53.1, 46656.0; 54.1, 11000.0; 55.1, 160768.0; 56.1, 7664.0; 57.1, 1880.0; 58.0, 691.0; 59.1, 868.0; 60.0, 263.0; 62.0, 1828.0; 63.1, 8660.0; 64.1, 3295.0; 65.1, 41680.0; 66.1, 9401.0; 67.1, 14710.0; 68.1, 2462.0; 69.1, 7860.0; 70.1, 572.0; 71.0, 662.0; 72.2, 216.0; 73.0, 659.0; 74.0, 869.0; 75.0, 1392.0; 77.1, 139200.0; 78.1, 49296.0; 79.1, 84288.0; 80.1, 9462.0; 81.1, 8170.0; 83.1, 461888.0; 84.1, 25784.0; 85.1, 5822.0; 86.1, 603.0; 87.0, 618.0; 87.9, 502.0; 89.1, 5275.0; 91.1, 263424.0; 92.1, 134464.0; 93.1, 68096.0; 94.1, 8612.0; 95.1, 6514.0; 96.0, 1140.0; 97.1, 1422.0; 98.1, 9124.0; 99.1, 4109.0; 100.0, 412.0; 101.1, 463.0; 102.1, 2096.0; 103.1, 16079.0; 105.1, 310016.0; 106.1, 29992.0; 107.1, 7195.0; 108.1, 4308.0; 109.1, 5105.0; 110.0, 1352.0; 111.1, 15485.0; 112.1, 8760.0; 113.0, 727.0; 115.1, 11018.0; 116.1, 2964.0; 117.1, 16848.0; 118.1, 27448.0; 120.1, 1805312.0; 121.1, 190976.0; 122.1, 9422.0; 123.1, 2892.0; 125.1, 24208.0; 126.1, 2846.0; 127.0, 1128.0; 128.0, 2285.0; 129.1, 2342.0; 130.0, 881.0; 131.0, 2335.0; 132.1, 1424.0; 133.0, 7139.0; 134.1, 2258.0; 135.0, 4225.0; 136.1, 1181.0; 137.0, 626.0; 138.1, 228.0; 139.1, 223.0; 141.1, 1326.0; 142.0, 825.0; 143.1, 1526.0; 144.1, 703.0; 145.1, 2649.0; 146.1, 717.0; 147.1, 2241.0; 148.1, 891.0; 149.0, 1281.0; 151.1, 4690.0; 152.0, 1041.0; 153.0, 711.0; 154.1, 325.0; 155.0, 534.0; 156.0, 408.0; 157.1, 1341.0; 158.0, 521.0; 159.1, 1016.0; 160.0, 426.0; 161.1, 2052.0; 162.1, 4368.0; 163.1, 3414.0; 164.1, 550.0; 165.1, 555.0; 167.1, 405.0; 168.0, 209.0; 169.1, 220.0; 170.0, 174.0; 171.0, 536.0; 172.0, 342.0; 173.2, 453.0; 174.1, 285.0; 175.1, 878.0; 176.1, 1296.0; 177.0, 3861.0; 178.0, 704.0; 179.0, 1718.0; 180.0, 292.0; 181.0, 191.0; 183.1, 161.0; 185.0, 937.0; 186.1, 807.0; 187.1, 337.0; 189.1, 526.0; 190.1, 315.0; 191.0, 535.0; 191.9, 255.0; 192.9, 1008.0; 194.1, 5844.0; 195.0, 1045.0; 196.0, 182.0; 199.1, 956.0; 200.1, 3512.0; 201.1, 1325.0; 202.0, 565.0; 203.1, 2420.0; 204.2, 343.0; 205.1, 272.0; 207.0, 1499.0; 208.0, 410.0; 208.9, 282.0; 214.0, 186.0; 215.3, 160.0; 216.1, 891.0; 218.2, 42560.0; 219.2, 7184.0; 220.2, 756.0; 223.1, 178.0; 234.1, 193.0; 235.1, 410.0; 237.0, 167.0; 248.9, 156.0; 250.9, 659.0; 252.9, 465.0; 267.0, 2210.0; 267.9, 657.0; 269.0, 438.0; 281.0, 444.0; 282.1, 155.0; 308.0, 193.0; 309.1, 623.0; 310.0, 230.0; 311.1, 180.0; 324.9, 225.0; 327.0, 454.0; 327.9, 215.0; 341.0, 557.0; 342.9, 187.0; 405.0, 174.0; 415.0, 212.0 |
| 32 | 15.426 | 31.1, 372.0; 32.0, 613.0; 35.0, 235.0; 36.0, 777.0; 37.0, 225.0; 38.0, 553.0; 39.1, 3542.0; 40.1, 850.0; 41.1, 9002.0; 42.1, 2374.0; 43.1, 10557.0; 44.0, 960.0; 45.0, 863.0; 50.0, 478.0; 51.0, 936.0; 52.0, 987.0; 53.1, 2955.0; 54.0, 1291.0; 55.1, 14529.0; 56.1, 1876.0; 57.1, 4749.0; 58.0, 482.0; 59.0, 3786.0; 60.1, 299.0; 60.9, 205.0; 61.9, 224.0; 63.0, 686.0; 63.9, 481.0; 65.0, 1983.0; 66.0, 714.0; 67.0, 3583.0; 68.0, 1733.0; 69.1, 6492.0; 70.1, 1562.0; 71.1, 1683.0; 72.0, 300.0; 73.2, 1979.0; 74.0, 39888.0; 75.0, 6875.0; 76.0, 859.0; 77.1, 4006.0; 78.0, 1511.0; 79.0, 4325.0; 80.1, 1434.0; 81.1, 6644.0; 82.2, 1691.0; 83.0, 31552.0; 84.1, 3381.0; 85.0, 1502.0; 87.0, 30536.0; 88.0, 2787.0; 89.0, 1053.0; 90.1, 611.0; 91.1, 4242.0; 92.1, 1163.0; 93.1, 5392.0; 94.0, 3016.0; 95.1, 3159.0; 96.1, 1066.0; 97.1, 3072.0; 98.1, 1485.0; 99.0, 498.0; 100.0, 272.0; 101.1, 3156.0; 102.1, 433.0; 103.0, 908.0; 103.9, 510.0; 105.0, 4818.0; 106.0, 1350.0; 107.1, 2321.0; 108.1, 848.0; 109.0, 1634.0; 110.1, 642.0; 111.0, 1808.0; 112.0, 1015.0; 113.0, 365.0; 114.0, 215.0; 115.0, 2201.0; 116.0, 718.0; 117.1, 1033.0; 118.1, 710.0; 119.0, 4197.0; 120.1, 4369.0; 121.0, 2568.0; 122.1, 911.0; 123.1, 6069.0; 124.1, 1949.0; 125.0, 1539.0; 126.0, 629.0; 127.1,                                                                                                                                                                                                                                                                                                                                                                                                                                                                                                                                                                                                                                                                                                                                                                                                                                                                                                                                                                                                                                                                                                                                                                                                                                                                                                                                                                                                                                                                                  |

|    |        |                                                                                                                                                                                                                                                                                                                                                                                                                                                                                                                                                                                                                                                                                                                                                                                                                                                                                                                                                                                                                                                                                                                                                                                                                                                                                                                                                                                                                                                                                                                                                                                                                                                                                                                                                                                                                                                                                                                                                                                                                                                                                                                                                                                                                                                                                                                                                                                                                                                                                                                                                                                                                                                      |
|----|--------|------------------------------------------------------------------------------------------------------------------------------------------------------------------------------------------------------------------------------------------------------------------------------------------------------------------------------------------------------------------------------------------------------------------------------------------------------------------------------------------------------------------------------------------------------------------------------------------------------------------------------------------------------------------------------------------------------------------------------------------------------------------------------------------------------------------------------------------------------------------------------------------------------------------------------------------------------------------------------------------------------------------------------------------------------------------------------------------------------------------------------------------------------------------------------------------------------------------------------------------------------------------------------------------------------------------------------------------------------------------------------------------------------------------------------------------------------------------------------------------------------------------------------------------------------------------------------------------------------------------------------------------------------------------------------------------------------------------------------------------------------------------------------------------------------------------------------------------------------------------------------------------------------------------------------------------------------------------------------------------------------------------------------------------------------------------------------------------------------------------------------------------------------------------------------------------------------------------------------------------------------------------------------------------------------------------------------------------------------------------------------------------------------------------------------------------------------------------------------------------------------------------------------------------------------------------------------------------------------------------------------------------------------|
|    |        | 280.0; 128.1, 494.0; 129.1, 4292.0; 130.0, 944.0; 131.0, 799.0; 132.1, 1093.0; 133.0, 4862.0; 134.0, 1280.0; 135.0, 5406.0; 136.0, 2473.0; 137.1, 2658.0; 138.1, 1383.0; 139.0, 754.0; 139.9, 338.0; 141.0, 3173.0; 142.2, 1084.0; 143.1, 12495.0; 144.0, 1480.0; 145.1, 1040.0; 146.0, 497.0; 147.0, 1592.0; 148.0, 4700.0; 149.0, 1897.0; 150.1, 1300.0; 151.0, 4982.0; 152.0, 928.0; 152.9, 556.0; 153.9, 167.0; 155.0, 246.0; 157.1, 3176.0; 158.1, 692.0; 159.0, 737.0; 160.0, 368.0; 161.0, 1081.0; 162.1, 434.0; 163.0, 1012.0; 163.9, 207.0; 164.3, 239.0; 165.1, 1154.0; 166.0, 629.0; 167.0, 2588.0; 168.1, 814.0; 169.1, 221.0; 169.9, 222.0; 171.1, 1153.0; 172.1, 201.0; 173.1, 332.0; 174.1, 329.0; 175.1, 2992.0; 176.0, 1480.0; 177.0, 4180.0; 178.0, 753.0; 179.0, 789.0; 181.1, 47688.0; 182.1, 5395.0; 183.0, 703.0; 185.1, 3278.0; 186.1, 672.0; 186.9, 184.0; 189.9, 206.0; 191.0, 921.0; 192.0, 300.0; 193.0, 1097.0; 194.1, 1229.0; 195.0, 513.0; 199.1, 10469.0; 200.2, 1737.0; 201.1, 644.0; 202.0, 160.0; 203.1, 1418.0; 204.1, 306.0; 205.1, 205.0; 207.0, 2086.0; 208.1, 551.0; 209.0, 458.0; 211.2, 5274.0; 212.2, 816.0; 213.2, 2289.0; 214.1, 472.0; 216.1, 921.0; 217.0, 270.0; 218.2, 714.0; 219.1, 159.0; 224.1, 12573.0; 225.1, 1480.0; 226.0, 266.0; 232.2, 196.0; 234.1, 755.0; 235.0, 347.0; 236.8, 199.0; 242.2, 5958.0; 243.2, 948.0; 244.1, 159.0; 250.9, 514.0; 252.9, 481.0; 266.9, 2065.0; 268.0, 722.0; 269.1, 458.0; 281.0, 551.0; 307.9, 163.0; 309.0, 834.0; 310.0, 214.0; 325.1, 230.0; 326.8, 416.0; 341.0, 473.0; 342.0, 200.0; 355.1, 153.0; 401.1, 171.0; 405.0, 160.0; 415.0, 199.0                                                                                                                                                                                                                                                                                                                                                                                                                                                                                                                                                                                                                                                                                                                                                                                                                                                                                                                                                                                                            |
| 33 | 15.486 | 30.9, 229.0; 32.0, 552.0; 34.9, 203.0; 36.0, 687.0; 38.0, 377.0; 39.1, 1547.0; 40.1, 289.0; 41.0, 1251.0; 42.0, 305.0; 43.0, 809.0; 43.9, 620.0; 45.0, 463.0; 50.1, 265.0; 51.0, 591.0; 51.9, 354.0; 53.1, 1269.0; 54.1, 342.0; 55.0, 4109.0; 56.0, 520.0; 57.1, 390.0; 57.9, 200.0; 59.0, 191.0; 60.0, 181.0; 61.1, 184.0; 63.0, 417.0; 63.9, 238.0; 65.0, 1052.0; 66.0, 239.0; 67.1, 747.0; 68.0, 440.0; 69.1, 779.0; 70.0, 443.0; 71.0, 252.0; 73.1, 933.0; 74.0, 280.0; 75.0, 586.0; 76.1, 198.0; 77.0, 3613.0; 78.0, 873.0; 79.1, 2325.0; 80.0, 363.0; 81.0, 725.0; 83.1, 23712.0; 84.0, 2109.0; 85.1, 476.0; 87.0, 228.0; 89.0, 544.0; 91.0, 4478.0; 92.0, 936.0; 93.1, 6329.0; 94.1, 865.0; 95.0, 499.0; 95.9, 239.0; 97.1, 428.0; 98.0, 271.0; 102.0, 181.0; 103.1, 776.0; 104.0, 279.0; 105.0, 2188.0; 106.0, 548.0; 107.1, 697.0; 107.9, 223.0; 109.0, 469.0; 110.1, 217.0; 111.1, 192.0; 112.0, 512.0; 112.9, 163.0; 113.8, 152.0; 114.9, 1105.0; 116.0, 252.0; 116.9, 1103.0; 118.0, 488.0; 119.0, 2517.0; 120.0, 1908.0; 121.0, 2296.0; 122.0, 505.0; 123.1, 422.0; 124.1, 195.0; 125.0, 473.0; 125.8, 398.0; 127.0, 213.0; 128.0, 358.0; 129.0, 413.0; 130.0, 155.0; 131.0, 677.0; 132.1, 782.0; 133.0, 4580.0; 134.0, 829.0; 135.0, 2872.0; 136.0, 516.0; 137.0, 477.0; 138.0, 176.0; 139.1, 232.0; 141.1, 394.0; 142.0, 167.0; 143.1, 271.0; 144.0, 174.0; 145.1, 547.0; 147.0, 992.0; 148.1, 626.0; 149.1, 575.0; 149.9, 276.0; 151.0, 3575.0; 152.1, 597.0; 153.0, 381.0; 153.9, 151.0; 154.9, 229.0; 156.0, 173.0; 157.0, 267.0; 158.1, 173.0; 159.1, 346.0; 160.1, 235.0; 161.0, 648.0; 162.0, 252.0; 163.1, 1504.0; 164.1, 296.0; 164.9, 479.0; 167.1, 311.0; 168.0, 332.0; 171.0, 152.0; 173.1, 284.0; 175.2, 241.0; 176.0, 1195.0; 177.0, 4226.0; 177.9, 580.0; 178.9, 773.0; 181.1, 3388.0; 182.0, 365.0; 183.0, 194.0; 185.0, 275.0; 187.1, 256.0; 189.1, 183.0; 190.0, 254.0; 191.0, 553.0; 191.9, 198.0; 192.9, 910.0; 194.0, 1116.0; 195.0, 361.0; 199.1, 460.0; 200.1, 243.0; 201.0, 783.0; 202.1, 167.0; 203.0, 247.0; 205.0, 249.0; 207.0, 1822.0; 208.1, 611.0; 208.8, 339.0; 213.2, 204.0; 214.1, 313.0; 216.1, 890.0; 217.1, 247.0; 218.1, 283.0; 220.9, 152.0; 223.0, 204.0; 224.1, 872.0; 225.1, 158.0; 232.2, 3838.0; 233.1, 627.0; 234.0, 317.0; 234.9, 411.0; 236.2, 150.0; 237.0, 503.0; 251.0, 548.0; 252.1, 162.0; 253.0, 608.0; 267.0, 2409.0; 268.0, 656.0; 269.1, 431.0; 281.0, 595.0; 282.0, 159.0; 308.2, 183.0; 309.0, 838.0; 309.9, 291.0; 311.0, 274.0; 325.0, 365.0; 327.0, 586.0; 328.1, 150.0; 341.0, 537.0; 341.9, 154.0; 343.0, 157.0; 400.9, 242.0; 405.1, 155.0; 415.0, 169.0; 499.1, 158.0 |
| 34 | 15.533 | 31.0, 268.0; 32.0, 659.0; 36.0, 815.0; 37.9, 247.0; 39.1, 929.0; 40.1, 238.0; 41.1, 1706.0; 42.1, 403.0; 43.1, 810.0; 44.0, 539.0; 45.0, 473.0; 50.0, 248.0; 51.0, 471.0; 52.0, 291.0; 53.0, 791.0; 54.0, 216.0; 55.1, 1822.0; 56.1, 350.0; 57.0, 352.0; 58.1, 151.0; 59.1, 329.0; 59.8, 179.0; 61.0, 151.0; 62.9, 309.0; 63.9, 156.0; 65.0, 730.0; 65.9, 228.0; 67.1, 877.0; 67.9, 399.0; 69.0, 1049.0; 70.0, 422.0; 71.0, 200.0; 73.0, 800.0; 73.9, 168.0; 74.9, 484.0; 76.0, 231.0; 77.0, 2261.0; 78.0, 693.0; 79.1, 1170.0; 80.0, 312.0; 81.0, 1005.0; 82.1, 551.0; 83.0, 2938.0; 84.0, 401.0; 84.9, 341.0; 87.0, 194.0; 89.0, 437.0; 91.1, 3304.0; 92.0, 601.0; 93.1, 2473.0; 94.1, 731.0; 95.1, 1535.0; 95.9, 360.0; 97.1, 393.0; 98.0, 234.0; 99.0, 202.0; 102.0, 182.0; 102.9, 789.0; 103.9, 343.0; 105.1, 2229.0; 106.1, 338.0; 107.0, 985.0; 108.0, 401.0; 109.1, 579.0; 110.1, 947.0; 111.0, 276.0; 112.0, 171.0; 113.0, 318.0; 114.0, 262.0; 115.0, 2085.0; 116.1, 592.0; 117.1, 1806.0; 118.1, 835.0; 119.0, 2200.0; 120.0, 1401.0; 121.1, 2368.0; 122.1, 389.0; 123.0, 565.0; 124.2, 211.0; 125.1, 193.0; 126.0, 608.0; 126.9, 313.0; 128.0, 586.0; 129.0, 564.0; 130.1, 155.0; 131.0, 909.0; 132.0, 782.0; 133.0, 5003.0; 134.0, 1104.0; 135.1, 10152.0; 136.0, 1628.0; 136.9, 494.0; 138.1, 198.0; 139.0, 152.0; 141.1, 370.0; 141.9, 258.0; 143.1, 271.0; 143.9, 179.0; 145.1, 1522.0; 146.0, 1033.0; 147.0, 1680.0; 148.1, 2932.0; 149.1, 959.0; 150.1, 225.0; 151.0, 3591.0; 152.0, 587.0; 153.0, 398.0; 155.1, 190.0; 156.0, 479.0; 157.1, 287.0; 158.1, 263.0; 159.0, 1119.0; 160.1, 408.0; 161.1, 1408.0; 162.1, 459.0; 163.1, 766.0; 164.1, 204.0; 165.0, 418.0; 167.0, 246.0; 168.0, 246.0; 170.9, 152.0;                                                                                                                                                                                                                                                                                                                                                                                                                                                                                                                                                                                                                                                                                                                                                                                                                                                                                                                    |

|    |        |                                                                                                                                                                                                                                                                                                                                                                                                                                                                                                                                                                                                                                                                                                                                                                                                                                                                                                                                                                                                                                                                                                                                                                                                                                                                                                                                                                                                                                                                                                                                                                                                                                                                                                                                                                                                                                                                                                                                                                                                                                                                                                                                                                                                                                                                                                                                                                                                                                                                                                                                                                                                                                                                                                                                                                                                       |
|----|--------|-------------------------------------------------------------------------------------------------------------------------------------------------------------------------------------------------------------------------------------------------------------------------------------------------------------------------------------------------------------------------------------------------------------------------------------------------------------------------------------------------------------------------------------------------------------------------------------------------------------------------------------------------------------------------------------------------------------------------------------------------------------------------------------------------------------------------------------------------------------------------------------------------------------------------------------------------------------------------------------------------------------------------------------------------------------------------------------------------------------------------------------------------------------------------------------------------------------------------------------------------------------------------------------------------------------------------------------------------------------------------------------------------------------------------------------------------------------------------------------------------------------------------------------------------------------------------------------------------------------------------------------------------------------------------------------------------------------------------------------------------------------------------------------------------------------------------------------------------------------------------------------------------------------------------------------------------------------------------------------------------------------------------------------------------------------------------------------------------------------------------------------------------------------------------------------------------------------------------------------------------------------------------------------------------------------------------------------------------------------------------------------------------------------------------------------------------------------------------------------------------------------------------------------------------------------------------------------------------------------------------------------------------------------------------------------------------------------------------------------------------------------------------------------------------------|
|    |        | 173.1, 487.0; 174.1, 516.0; 175.1, 425.0; 176.0, 1286.0; 177.0, 4133.0; 177.9, 851.0; 178.9, 698.0; 180.1, 195.0; 181.1, 1767.0; 182.0, 248.0; 185.2, 189.0; 191.0, 489.0; 191.9, 212.0; 192.9, 983.0; 194.0, 814.0; 195.0, 558.0; 199.1, 226.0; 200.2, 160.0; 201.0, 747.0; 202.0, 231.0; 203.1, 451.0; 204.9, 186.0; 207.0, 1671.0; 208.0, 401.0; 209.0, 313.0; 216.1, 1040.0; 217.2, 305.0; 218.2, 2635.0; 219.1, 409.0; 220.1, 179.0; 223.1, 162.0; 224.1, 579.0; 230.1, 305.0; 233.9, 175.0; 235.0, 424.0; 237.0, 241.0; 248.8, 168.0; 251.0, 617.0; 253.1, 483.0; 267.0, 2368.0; 267.9, 585.0; 269.0, 427.0; 281.0, 647.0; 282.9, 163.0; 308.1, 200.0; 309.0, 960.0; 310.0, 355.0; 311.0, 223.0; 324.9, 210.0; 327.0, 457.0; 327.8, 165.0; 340.9, 517.0; 342.1, 182.0; 383.1, 159.0; 400.9, 158.0; 415.0, 241.0; 499.1, 160.0                                                                                                                                                                                                                                                                                                                                                                                                                                                                                                                                                                                                                                                                                                                                                                                                                                                                                                                                                                                                                                                                                                                                                                                                                                                                                                                                                                                                                                                                                                                                                                                                                                                                                                                                                                                                                                                                                                                                                                   |
| 35 | 15.776 | 30.1, 209.0; 31.1, 264.0; 32.0, 590.0; 35.0, 160.0; 35.9, 757.0; 38.0, 492.0; 39.1, 6581.0; 40.2, 1099.0; 41.1, 15780.0; 42.0, 1497.0; 43.1, 3462.0; 44.0, 721.0; 45.0, 532.0; 50.0, 301.0; 51.1, 1172.0; 52.1, 844.0; 53.1, 5338.0; 54.1, 3926.0; 55.1, 10809.0; 56.1, 1674.0; 57.1, 1335.0; 59.0, 568.0; 60.0, 584.0; 61.0, 259.0; 62.9, 483.0; 63.9, 194.0; 65.1, 2338.0; 66.1, 1116.0; 67.1, 10147.0; 68.1, 2372.0; 69.1, 11093.0; 70.1, 1291.0; 71.0, 706.0; 73.0, 1422.0; 74.0, 218.0; 75.0, 419.0; 75.9, 253.0; 77.0, 4562.0; 78.1, 1033.0; 79.1, 4773.0; 80.0, 1089.0; 81.1, 6890.0; 82.0, 12230.0; 83.1, 3991.0; 84.1, 831.0; 85.1, 602.0; 86.0, 193.0; 87.0, 272.0; 88.1, 202.0; 88.9, 427.0; 91.0, 4943.0; 92.1, 1077.0; 93.1, 3224.0; 94.1, 1767.0; 95.1, 27240.0; 96.0, 2763.0; 97.1, 1254.0; 97.9, 457.0; 99.1, 270.0; 101.1, 217.0; 102.0, 264.0; 103.0, 1069.0; 103.9, 343.0; 105.0, 2749.0; 106.1, 525.0; 107.1, 3581.0; 108.1, 7004.0; 109.1, 32072.0; 110.0, 39984.0; 111.1, 3859.0; 111.9, 355.0; 113.0, 222.0; 114.0, 181.0; 115.0, 1221.0; 115.9, 379.0; 117.0, 1328.0; 118.1, 643.0; 119.1, 3170.0; 120.0, 1294.0; 121.1, 6272.0; 122.0, 1575.0; 123.0, 7590.0; 124.1, 831.0; 125.0, 424.0; 126.0, 355.0; 127.1, 190.0; 128.0, 792.0; 129.1, 756.0; 130.1, 283.0; 131.1, 996.0; 132.1, 791.0; 133.0, 4518.0; 135.0, 49312.0; 136.1, 6863.0; 137.1, 89552.0; 138.1, 9360.0; 139.1, 733.0; 140.0, 175.0; 140.9, 265.0; 141.1, 266.0; 143.1, 360.0; 143.8, 152.0; 145.0, 1198.0; 146.0, 473.0; 147.1, 1216.0; 148.1, 883.0; 149.1, 3579.0; 150.1, 3383.0; 151.1, 5615.0; 152.1, 849.0; 153.1, 482.0; 154.9, 183.0; 157.0, 244.0; 158.1, 163.0; 159.1, 900.0; 160.0, 254.0; 161.0, 1507.0; 162.0, 768.0; 163.1, 1478.0; 164.1, 690.0; 165.0, 1167.0; 166.1, 214.0; 167.0, 188.0; 168.1, 347.0; 168.9, 151.0; 170.9, 255.0; 173.2, 157.0; 175.1, 254.0; 176.0, 1177.0; 177.0, 7724.0; 178.1, 1210.0; 179.1, 776.0; 181.0, 966.0; 182.0, 201.0; 185.0, 576.0; 185.9, 162.0; 187.0, 426.0; 188.0, 154.0; 191.1, 769.0; 192.2, 435.0; 193.0, 1098.0; 194.0, 644.0; 194.9, 258.0; 199.1, 403.0; 200.1, 158.0; 201.0, 402.0; 202.1, 259.0; 203.0, 385.0; 204.1, 164.0; 205.2, 3453.0; 206.2, 667.0; 207.0, 1834.0; 207.9, 447.0; 209.0, 383.0; 214.1, 244.0; 216.1, 538.0; 217.1, 215.0; 218.0, 223.0; 220.2, 11229.0; 221.2, 1742.0; 222.2, 223.0; 222.9, 242.0; 224.1, 352.0; 228.0, 264.0; 234.9, 475.0; 236.0, 174.0; 236.9, 178.0; 248.8, 161.0; 250.9, 676.0; 252.0, 167.0; 253.0, 657.0; 254.0, 198.0; 267.0, 2577.0; 267.9, 679.0; 268.9, 530.0; 270.0, 166.0; 281.0, 498.0; 282.0, 222.0; 308.1, 248.0; 309.0, 1007.0; 309.8, 233.0; 325.0, 160.0; 327.0, 599.0; 331.1, 179.0; 341.0, 524.0; 341.9, 201.0; 343.0, 251.0; 355.0, 159.0; 415.1, 241.0; 416.0, 152.0; 499.0, 184.0 |
| 36 | 15.824 | 30.2, 257.0; 31.1, 436.0; 32.0, 515.0; 35.0, 218.0; 36.0, 765.0; 38.0, 408.0; 39.1, 3377.0; 40.1, 837.0; 41.1, 14723.0; 42.1, 3414.0; 43.1, 15867.0; 44.1, 1263.0; 45.0, 2638.0; 50.0, 190.0; 51.0, 455.0; 52.0, 236.0; 53.1, 1542.0; 54.0, 1606.0; 55.1, 16552.0; 56.1, 3583.0; 57.1, 14631.0; 58.0, 823.0; 59.1, 1457.0; 60.0, 21768.0; 61.0, 4975.0; 62.0, 357.0; 62.9, 231.0; 64.9, 716.0; 66.1, 303.0; 67.1, 2329.0; 68.0, 2008.0; 69.1, 10650.0; 70.1, 3007.0; 71.1, 9322.0; 73.0, 29024.0; 74.0, 2844.0; 75.0, 652.0; 76.0, 223.0; 77.0, 1556.0; 78.1, 402.0; 79.1, 1485.0; 80.1, 497.0; 81.0, 1944.0; 82.1, 2185.0; 83.1, 9491.0; 84.1, 3994.0; 85.1, 7498.0; 86.1, 957.0; 87.1, 6812.0; 88.1, 800.0; 89.0, 396.0; 91.1, 1630.0; 92.1, 377.0; 93.1, 1107.0; 94.1, 834.0; 95.1, 1865.0; 96.1, 1921.0; 97.1, 6158.0; 98.1, 4175.0; 99.1, 2948.0; 100.0, 389.0; 101.0, 2770.0; 102.0, 1033.0; 103.0, 732.0; 104.1, 229.0; 105.0, 1236.0; 105.9, 326.0; 107.0, 1148.0; 108.0, 621.0; 109.1, 1491.0; 110.1, 1664.0; 111.0, 2978.0; 112.0, 1400.0; 113.1, 1832.0; 113.9, 365.0; 115.0, 6157.0; 116.0, 1783.0; 117.0, 1004.0; 118.0, 531.0; 119.1, 1888.0; 120.0, 907.0; 121.0, 1203.0; 121.9, 334.0; 123.1, 551.0; 124.1, 584.0; 125.1, 1481.0; 126.1, 1038.0; 127.1, 1002.0; 128.1, 740.0; 129.1, 22040.0; 130.1, 2117.0; 131.0, 563.0; 131.9, 406.0; 133.0, 4051.0; 134.0, 792.0; 135.0, 3554.0; 136.0, 735.0; 137.0, 1383.0; 138.2, 808.0; 139.1, 603.0; 140.0, 607.0; 141.0, 339.0; 143.1, 5262.0; 144.1, 571.0; 145.0, 376.0; 146.2, 322.0; 147.0, 823.0; 148.1, 306.0; 149.0, 510.0; 151.0, 2494.0; 151.9, 612.0; 152.9, 483.0; 154.0, 313.0; 155.0, 169.0; 157.1, 2485.0; 158.1, 498.0; 159.1, 357.0; 160.0, 157.0; 161.1, 638.0; 161.9, 194.0; 162.9, 434.0; 164.1, 220.0; 165.0, 390.0; 166.1, 1670.0; 167.1, 466.0; 168.1, 951.0; 169.1, 423.0; 171.1, 5739.0; 172.1, 959.0; 173.0, 216.0; 176.0, 1156.0; 177.0, 4426.0; 178.0, 758.0; 179.1, 688.0; 179.9, 170.0; 181.1, 1080.0; 182.0, 242.0; 183.0, 152.0; 185.2, 17760.0; 186.2, 2269.0; 187.1, 410.0; 191.0, 690.0; 192.1, 476.0; 192.9, 1051.0; 194.0, 762.0; 194.9, 325.0; 196.9, 151.0; 199.2, 3323.0; 200.2, 726.0; 201.1, 337.0; 202.0, 159.0; 203.1, 169.0; 207.0, 1935.0; 208.0, 560.0; 209.0, 522.0; 211.1, 416.0; 214.1, 155.0; 215.1, 562.0; 216.0, 496.0; 217.1, 156.0; 218.0, 228.0; 220.1, 258.0; 223.0, 222.0; 224.0, 269.0; 228.2, 11890.0; 229.2, 1953.0; 230.1, 403.0; 234.0, 198.0;                                                                                                                                                                                                                                                                                                                                |



|    |        |                                                                                                                                                                                                                                                                                                                                                                                                                                                                                                                                                                                                                                                                                                                                                                                                                                                                                                                                                                                                                                                                                                                                                                                                                                                                                                                                                                                                                                                                                                                                                                                                                                                                                                                                                                                                                                                                                                                                                                                                                                                                                                                                                                                                                                                                                                                                                                                                                                                                                                                                                                                                                                                                                                                                                                                                                                                                                                                      |
|----|--------|----------------------------------------------------------------------------------------------------------------------------------------------------------------------------------------------------------------------------------------------------------------------------------------------------------------------------------------------------------------------------------------------------------------------------------------------------------------------------------------------------------------------------------------------------------------------------------------------------------------------------------------------------------------------------------------------------------------------------------------------------------------------------------------------------------------------------------------------------------------------------------------------------------------------------------------------------------------------------------------------------------------------------------------------------------------------------------------------------------------------------------------------------------------------------------------------------------------------------------------------------------------------------------------------------------------------------------------------------------------------------------------------------------------------------------------------------------------------------------------------------------------------------------------------------------------------------------------------------------------------------------------------------------------------------------------------------------------------------------------------------------------------------------------------------------------------------------------------------------------------------------------------------------------------------------------------------------------------------------------------------------------------------------------------------------------------------------------------------------------------------------------------------------------------------------------------------------------------------------------------------------------------------------------------------------------------------------------------------------------------------------------------------------------------------------------------------------------------------------------------------------------------------------------------------------------------------------------------------------------------------------------------------------------------------------------------------------------------------------------------------------------------------------------------------------------------------------------------------------------------------------------------------------------------|
|    |        | 235.0, 464.0; 236.1, 157.0; 237.0, 192.0; 250.9, 485.0; 252.0, 221.0; 253.0, 605.0; 267.0, 2157.0; 268.0, 573.0; 269.0, 395.0; 281.0, 530.0; 308.0, 159.0; 309.0, 750.0; 310.1, 254.0; 311.1, 171.0; 325.1, 190.0; 327.1, 375.0; 328.1, 186.0; 331.0, 278.0; 341.0, 534.0; 342.0, 181.0; 405.0, 183.0; 415.0, 213.0; 499.1, 248.0                                                                                                                                                                                                                                                                                                                                                                                                                                                                                                                                                                                                                                                                                                                                                                                                                                                                                                                                                                                                                                                                                                                                                                                                                                                                                                                                                                                                                                                                                                                                                                                                                                                                                                                                                                                                                                                                                                                                                                                                                                                                                                                                                                                                                                                                                                                                                                                                                                                                                                                                                                                    |
| 37 | 16.073 | 31.1, 305.0; 32.1, 545.0; 34.8, 156.0; 36.0, 729.0; 37.0, 152.0; 38.1, 808.0; 39.1, 12241.0; 40.1, 2453.0; 41.1, 15120.0; 42.1, 1778.0; 43.1, 5826.0; 44.0, 612.0; 45.0, 709.0; 50.0, 901.0; 51.1, 3493.0; 52.1, 2055.0; 53.1, 11983.0; 54.0, 2406.0; 55.1, 29504.0; 56.1, 1794.0; 57.0, 1806.0; 58.0, 329.0; 59.0, 694.0; 60.1, 1329.0; 61.0, 504.0; 62.1, 290.0; 63.1, 1670.0; 65.1, 8905.0; 66.1, 3200.0; 67.1, 19168.0; 68.1, 4051.0; 69.1, 10784.0; 70.0, 1218.0; 71.1, 1220.0; 72.1, 192.0; 73.1, 2146.0; 74.0, 436.0; 75.0, 737.0; 77.1, 17864.0; 78.1, 4542.0; 79.1, 22240.0; 80.1, 5045.0; 81.1, 8729.0; 82.2, 6042.0; 83.0, 120352.0; 84.1, 7003.0; 85.1, 3654.0; 86.0, 344.0; 87.0, 784.0; 88.1, 493.0; 89.0, 1022.0; 91.1, 28184.0; 92.1, 4876.0; 93.1, 17968.0; 94.1, 7745.0; 95.1, 24208.0; 96.1, 12283.0; 97.1, 2299.0; 98.0, 939.0; 99.1, 1253.0; 100.1, 216.0; 101.0, 285.0; 102.0, 718.0; 103.0, 3289.0; 104.2, 1413.0; 105.1, 27152.0; 106.1, 4881.0; 107.1, 37056.0; 108.1, 10157.0; 109.1, 21832.0; 110.0, 2494.0; 111.1, 2517.0; 112.0, 722.0; 112.9, 311.0; 114.2, 286.0; 115.0, 6116.0; 116.1, 1971.0; 117.1, 6124.0; 118.1, 2095.0; 119.1, 18024.0; 120.1, 18816.0; 121.1, 19624.0; 122.1, 8309.0; 123.1, 67680.0; 124.1, 10081.0; 125.1, 12116.0; 126.1, 2171.0; 127.0, 1046.0; 128.1, 2628.0; 129.1, 4773.0; 130.0, 1084.0; 131.1, 3005.0; 132.0, 1767.0; 133.0, 9228.0; 134.2, 5185.0; 135.1, 89096.0; 136.1, 11855.0; 137.1, 5638.0; 138.1, 5267.0; 139.0, 874.0; 140.1, 383.0; 141.1, 1386.0; 142.1, 1555.0; 143.1, 3541.0; 144.1, 1186.0; 145.1, 3490.0; 146.2, 1454.0; 147.1, 10780.0; 148.1, 2446.0; 149.1, 9658.0; 150.1, 17168.0; 151.1, 5103.0; 152.0, 875.0; 153.0, 688.0; 154.0, 359.0; 155.0, 662.0; 156.1, 780.0; 157.1, 3894.0; 158.1, 1008.0; 159.1, 1988.0; 160.1, 1410.0; 161.1, 5246.0; 162.1, 2614.0; 163.1, 4477.0; 164.2, 767.0; 165.0, 513.0; 166.0, 269.0; 167.0, 318.0; 168.1, 302.0; 168.9, 250.0; 169.2, 246.0; 170.1, 531.0; 171.1, 954.0; 172.2, 434.0; 173.1, 1004.0; 174.1, 694.0; 175.1, 9851.0; 176.1, 3476.0; 177.1, 4641.0; 178.1, 871.0; 179.0, 876.0; 180.0, 196.0; 181.0, 507.0; 182.1, 172.0; 183.1, 291.0; 185.1, 3008.0; 186.1, 456.0; 187.2, 442.0; 188.1, 267.0; 189.1, 1775.0; 190.1, 2481.0; 191.1, 1062.0; 192.2, 274.0; 193.0, 878.0; 194.0, 662.0; 195.0, 356.0; 197.0, 172.0; 199.0, 426.0; 200.1, 792.0; 201.1, 968.0; 203.1, 32568.0; 204.1, 5464.0; 205.1, 519.0; 207.0, 2462.0; 208.1, 579.0; 208.9, 465.0; 215.1, 150.0; 216.1, 1335.0; 218.2, 34968.0; 219.2, 5609.0; 220.2, 575.0; 223.1, 152.0; 224.1, 305.0; 228.1, 645.0; 234.2, 171.0; 234.9, 446.0; 248.8, 201.0; 250.9, 529.0; 253.0, 797.0; 253.9, 182.0; 265.1, 153.0; 267.0, 1954.0; 268.0, 551.0; 269.0, 442.0; 280.9, 593.0; 308.1, 195.0; 309.0, 676.0; 310.0, 226.0; 310.9, 234.0; 324.8, 210.0; 327.0, 514.0; 331.1, 152.0; 340.9, 555.0; 342.1, 231.0; 415.0, 251.0 |
| 38 | 16.299 | 30.1, 173.0; 31.1, 270.0; 32.0, 672.0; 34.9, 202.0; 35.9, 722.0; 38.0, 512.0; 39.0, 2243.0; 40.0, 406.0; 41.1, 3130.0; 42.0, 546.0; 43.0, 1732.0; 44.0, 569.0; 44.9, 547.0; 50.0, 199.0; 51.0, 561.0; 52.1, 403.0; 53.1, 1764.0; 54.1, 532.0; 55.1, 5801.0; 56.1, 644.0; 57.0, 1046.0; 58.0, 309.0; 59.0, 1486.0; 60.0, 803.0; 61.0, 321.0; 63.0, 235.0; 65.0, 1248.0; 66.0, 455.0; 67.0, 2075.0; 68.0, 749.0; 69.0, 1689.0; 70.1, 520.0; 71.0, 543.0; 73.0, 1467.0; 74.0, 214.0; 75.0, 358.0; 77.1, 4206.0; 78.1, 1173.0; 79.1, 4687.0; 80.0, 694.0; 81.1, 5595.0; 83.0, 32936.0; 84.1, 2176.0; 85.1, 581.0; 87.0, 998.0; 88.9, 440.0; 91.0, 5064.0; 92.2, 1206.0; 93.1, 21080.0; 94.1, 7267.0; 95.1, 2324.0; 96.0, 582.0; 97.1, 552.0; 98.1, 377.0; 99.0, 249.0; 101.0, 197.0; 103.0, 804.0; 104.0, 297.0; 105.0, 1781.0; 106.1, 454.0; 107.1, 1809.0; 108.0, 719.0; 109.1, 1590.0; 110.0, 3493.0; 111.0, 779.0; 112.1, 225.0; 113.0, 191.0; 113.9, 354.0; 114.9, 1076.0; 116.0, 373.0; 117.1, 1211.0; 118.1, 900.0; 119.0, 2756.0; 120.0, 722.0; 121.1, 1485.0; 122.0, 479.0; 123.1, 4189.0; 124.0, 601.0; 125.0, 1100.0; 126.0, 1499.0; 127.0, 309.0; 128.1, 342.0; 129.0, 765.0; 130.1, 209.0; 131.1, 445.0; 132.0, 1558.0; 133.0, 4148.0; 134.0, 867.0; 135.0, 4209.0; 136.0, 867.0; 137.1, 1431.0; 138.0, 278.0; 138.9, 207.0; 141.0, 1121.0; 142.0, 224.0; 143.0, 429.0; 145.0, 468.0; 145.9, 185.0; 147.0, 995.0; 148.1, 389.0; 149.1, 461.0; 150.1, 856.0; 151.1, 7615.0; 152.0, 1092.0; 153.0, 410.0; 154.0, 288.0; 155.1, 224.0; 155.8, 174.0; 156.9, 286.0; 159.0, 446.0; 160.0, 376.0; 161.1, 830.0; 161.8, 189.0; 162.3, 224.0; 163.0, 271.0; 164.0, 175.0; 165.0, 253.0; 166.1, 152.0; 166.8, 405.0; 167.9, 167.0; 171.1, 286.0; 172.9, 291.0; 175.0, 1488.0; 176.1, 1379.0; 177.0, 4525.0; 178.0, 765.0; 179.0, 842.0; 180.1, 197.0; 181.1, 340.0; 185.2, 543.0; 189.1, 170.0; 191.0, 772.0; 192.0, 323.0; 193.0, 1085.0; 194.0, 462.0; 195.0, 379.0; 199.1, 289.0; 201.0, 446.0; 203.1, 300.0; 206.0, 163.0; 207.0, 2678.0; 207.9, 778.0; 209.0, 674.0; 211.0, 158.0; 216.0, 690.0; 216.9, 191.0; 218.1, 539.0; 219.1, 284.0; 222.8, 240.0; 228.2, 371.0; 234.2, 388.0; 235.0, 542.0; 237.0, 186.0; 249.0, 172.0; 251.0, 536.0; 251.9, 177.0; 253.0, 517.0; 267.0, 1911.0; 268.0, 558.0; 269.0, 413.0; 280.9, 715.0; 283.0, 160.0; 308.0, 169.0; 309.0, 672.0; 310.9, 184.0; 325.0, 221.0; 327.0, 540.0; 329.0, 170.0; 341.0, 566.0; 342.0, 224.0; 343.0, 198.0; 355.2, 161.0; 383.0, 156.0; 405.0, 177.0; 415.0, 168.0                                                                                                                                                                                                                                                                                                                                                                            |

|    |        |                                                                                                                                                                                                                                                                                                                                                                                                                                                                                                                                                                                                                                                                                                                                                                                                                                                                                                                                                                                                                                                                                                                                                                                                                                                                                                                                                                                                                                                                                                                                                                                                                                                                                                                                                                                                                                                                                                                                                                                                                                                                                                                                                                                                                                                                                                                                                                                                                                                                                                      |
|----|--------|------------------------------------------------------------------------------------------------------------------------------------------------------------------------------------------------------------------------------------------------------------------------------------------------------------------------------------------------------------------------------------------------------------------------------------------------------------------------------------------------------------------------------------------------------------------------------------------------------------------------------------------------------------------------------------------------------------------------------------------------------------------------------------------------------------------------------------------------------------------------------------------------------------------------------------------------------------------------------------------------------------------------------------------------------------------------------------------------------------------------------------------------------------------------------------------------------------------------------------------------------------------------------------------------------------------------------------------------------------------------------------------------------------------------------------------------------------------------------------------------------------------------------------------------------------------------------------------------------------------------------------------------------------------------------------------------------------------------------------------------------------------------------------------------------------------------------------------------------------------------------------------------------------------------------------------------------------------------------------------------------------------------------------------------------------------------------------------------------------------------------------------------------------------------------------------------------------------------------------------------------------------------------------------------------------------------------------------------------------------------------------------------------------------------------------------------------------------------------------------------------|
| 39 | 16.423 | 31.0, 270.0; 32.0, 698.0; 35.0, 150.0; 36.0, 672.0; 38.0, 347.0; 39.1, 953.0; 40.0, 245.0; 41.0, 1698.0; 42.1, 300.0; 43.1, 1254.0; 44.0, 647.0; 45.0, 387.0; 50.0, 183.0; 51.1, 354.0; 51.9, 301.0; 53.0, 637.0; 54.2, 250.0; 55.0, 2134.0; 56.0, 387.0; 57.0, 660.0; 58.1, 152.0; 58.9, 162.0; 60.0, 593.0; 61.0, 308.0; 62.9, 198.0; 65.1, 650.0; 65.8, 229.0; 67.0, 784.0; 67.9, 491.0; 69.0, 1016.0; 70.1, 366.0; 71.1, 411.0; 73.0, 1427.0; 74.0, 205.0; 75.0, 418.0; 77.0, 1574.0; 78.0, 445.0; 79.0, 1827.0; 80.0, 756.0; 81.0, 792.0; 82.1, 1135.0; 83.0, 5474.0; 83.9, 527.0; 85.0, 649.0; 86.0, 161.0; 87.0, 285.0; 88.9, 294.0; 89.9, 165.0; 91.1, 2137.0; 92.0, 480.0; 93.1, 788.0; 94.1, 531.0; 95.1, 745.0; 96.1, 448.0; 97.1, 615.0; 98.1, 365.0; 98.9, 226.0; 100.9, 154.0; 103.0, 635.0; 104.0, 281.0; 105.0, 1141.0; 106.0, 338.0; 107.0, 1176.0; 108.1, 969.0; 109.1, 1680.0; 110.0, 566.0; 111.0, 379.0; 113.9, 354.0; 115.1, 914.0; 116.1, 238.0; 117.0, 973.0; 118.0, 798.0; 119.0, 1653.0; 120.0, 661.0; 121.0, 1028.0; 122.0, 314.0; 123.0, 484.0; 124.1, 299.0; 125.0, 661.0; 125.9, 418.0; 127.0, 240.0; 128.1, 326.0; 129.1, 723.0; 130.0, 203.0; 131.0, 488.0; 133.0, 3929.0; 134.0, 993.0; 135.0, 5467.0; 136.1, 993.0; 137.0, 538.0; 138.1, 220.0; 138.8, 224.0; 141.0, 271.0; 142.0, 157.0; 143.1, 298.0; 145.0, 402.0; 145.8, 186.0; 146.9, 874.0; 148.0, 518.0; 149.0, 1078.0; 151.0, 2640.0; 152.0, 513.0; 153.0, 539.0; 154.0, 234.0; 155.9, 166.0; 157.1, 236.0; 158.0, 267.0; 159.1, 405.0; 160.0, 325.0; 161.0, 1159.0; 161.9, 334.0; 162.9, 270.0; 165.1, 379.0; 166.1, 494.0; 166.9, 431.0; 171.0, 310.0; 171.9, 154.0; 172.9, 248.0; 175.1, 674.0; 176.0, 1201.0; 177.0, 3996.0; 178.0, 725.0; 179.0, 642.0; 180.1, 183.0; 181.1, 524.0; 183.1, 153.0; 184.0, 235.0; 185.1, 503.0; 189.0, 275.0; 191.0, 630.0; 191.8, 273.0; 193.0, 1053.0; 194.0, 605.0; 195.0, 259.0; 199.0, 711.0; 200.0, 197.0; 201.0, 303.0; 202.0, 174.0; 203.1, 163.0; 205.1, 161.0; 207.0, 2893.0; 208.1, 640.0; 209.0, 684.0; 209.9, 212.0; 212.9, 249.0; 216.0, 440.0; 217.1, 1069.0; 218.1, 322.0; 223.0, 234.0; 228.2, 205.0; 232.1, 4432.0; 233.2, 819.0; 234.0, 346.0; 234.9, 543.0; 235.9, 155.0; 249.0, 225.0; 251.0, 512.0; 253.0, 638.0; 267.0, 2024.0; 268.0, 488.0; 268.9, 478.0; 280.9, 628.0; 282.1, 232.0; 283.0, 152.0; 309.0, 661.0; 309.9, 150.0; 310.9, 216.0; 325.0, 255.0; 326.9, 484.0; 330.9, 190.0; 341.0, 623.0; 342.0, 178.0; 343.0, 162.0; 355.0, 204.0 |
|    |        | 31.0, 325.0; 32.0, 585.0; 35.0, 150.0; 36.0, 665.0; 37.9, 281.0; 39.1, 715.0; 40.0, 223.0; 41.1, 1411.0; 42.0, 378.0; 43.1, 1110.0; 44.0, 748.0; 45.0, 486.0; 50.0, 182.0; 51.1, 234.0; 52.0, 151.0; 53.0, 479.0; 53.9, 227.0; 55.0, 1381.0; 56.0, 366.0; 57.1, 876.0; 58.1, 354.0; 59.1, 911.0; 60.0, 361.0; 63.0, 276.0; 65.0, 520.0; 67.0, 696.0; 68.0, 501.0; 69.1, 2500.0; 70.1, 451.0; 70.9, 428.0; 72.0, 171.0; 73.0, 1282.0; 74.0, 190.0; 74.9, 384.0; 75.9, 168.0; 77.0, 1477.0; 78.0, 372.0; 79.1, 751.0; 80.2, 248.0; 81.1, 771.0; 82.1, 668.0; 83.1, 2051.0; 84.0, 542.0; 85.1, 581.0; 87.0, 512.0; 88.0, 165.0; 88.9, 422.0; 91.1, 1556.0; 91.9, 358.0; 93.0, 739.0; 94.0, 282.0; 95.1, 788.0; 96.1, 458.0; 97.0, 539.0; 98.0, 314.0; 99.0, 171.0; 102.0, 152.0; 103.0, 545.0; 103.9, 276.0; 105.0, 1114.0; 106.0, 306.0; 107.1, 1002.0; 107.9, 283.0; 109.0, 772.0; 110.1, 589.0; 111.1, 350.0; 111.9, 219.0; 113.2, 218.0; 114.1, 272.0; 115.0, 969.0; 116.0, 453.0; 117.0, 1089.0; 118.0, 1068.0; 119.0, 1824.0; 120.0, 799.0; 121.0, 1004.0; 122.0, 221.0; 123.0, 429.0; 124.1, 237.0; 124.9, 307.0; 126.0, 523.0; 126.9, 240.0; 128.1, 343.0; 129.0, 837.0; 130.1, 235.0; 131.0, 485.0; 132.1, 442.0; 133.0, 3910.0; 134.0, 931.0; 135.0, 5076.0; 136.1, 1322.0; 137.0, 812.0; 139.0, 175.0; 141.1, 224.0; 142.1, 191.0; 143.2, 223.0; 144.1, 155.0; 145.0, 679.0; 146.1, 202.0; 146.9, 664.0; 147.9, 198.0; 149.0, 480.0; 149.9, 214.0; 151.0, 3561.0; 152.0, 654.0; 153.1, 276.0; 154.0, 216.0; 155.9, 202.0; 156.9, 184.0; 159.1, 396.0; 160.0, 339.0; 160.9, 602.0; 162.1, 172.0; 163.0, 452.0; 164.0, 180.0; 165.0, 525.0; 166.0, 252.0; 166.9, 206.0; 168.0, 179.0; 171.1, 207.0; 173.1, 271.0; 175.0, 281.0; 176.0, 1061.0; 177.0, 4220.0; 178.0, 770.0; 179.1, 3140.0; 180.0, 446.0; 181.0, 510.0; 185.1, 323.0; 187.0, 196.0; 190.9, 865.0; 192.1, 360.0; 193.1, 8086.0; 194.1, 1297.0; 195.1, 386.0; 199.2, 203.0; 201.0, 642.0; 202.0, 192.0; 207.0, 2839.0; 208.1, 782.0; 209.0, 527.0; 216.0, 1124.0; 217.1, 273.0; 222.2, 182.0; 222.9, 244.0; 228.1, 214.0; 234.1, 164.0; 235.0, 570.0; 236.1, 161.0; 237.1, 173.0; 249.0, 255.0; 249.9, 154.0; 250.9, 632.0; 252.0, 165.0; 253.0, 485.0; 264.2, 416.0; 265.0, 208.0; 267.0, 1845.0; 267.9, 531.0; 268.9, 415.0; 281.1, 709.0; 282.0, 179.0; 308.2, 242.0; 309.0, 692.0; 309.9, 254.0; 311.0, 154.0; 324.9, 265.0; 327.0, 381.0; 331.1, 200.0; 341.0, 535.0; 342.1, 176.0; 343.0, 159.0; 355.0, 214.0; 414.9, 174.0 |
|    |        | 30.9, 214.0; 32.0, 657.0; 34.9, 173.0; 36.0, 812.0; 38.0, 396.0; 39.1, 1147.0; 39.9, 279.0; 41.0, 1601.0; 42.0, 345.0; 43.0, 1118.0; 43.9, 668.0; 45.0, 474.0; 50.0, 210.0; 51.0, 436.0; 52.0, 291.0; 53.1, 1182.0; 54.1, 347.0; 55.1, 3199.0; 56.0, 352.0; 57.0, 833.0; 58.1, 236.0; 58.9, 181.0; 60.0, 458.0; 60.8, 172.0; 63.0, 301.0; 64.9, 661.0; 66.1, 402.0; 67.1, 977.0; 68.0, 578.0; 69.0, 1047.0; 70.1, 338.0; 71.0, 391.0; 73.1, 1179.0; 74.1, 158.0; 75.0, 364.0; 76.1, 187.0; 77.0, 1940.0; 78.1, 490.0; 79.0, 1706.0; 80.1, 332.0; 81.1, 1274.0; 82.1, 936.0; 83.1, 15584.0; 84.0, 1130.0; 85.0, 426.0; 87.0, 228.0; 88.9, 524.0; 91.1, 2113.0; 91.9, 333.0; 93.0, 2031.0; 94.0, 631.0; 95.0, 940.0; 96.0, 425.0; 97.0, 568.0; 98.0, 1982.0; 99.1, 917.0; 101.0, 170.0; 103.0, 592.0; 104.0, 336.0; 105.0, 1160.0; 106.1, 264.0; 107.1, 790.0; 108.1, 895.0; 109.1, 1461.0; 109.9, 367.0; 111.1, 585.0; 112.1, 192.0; 112.9, 219.0; 114.0, 278.0; 115.0, 940.0; 116.0, 344.0; 117.1, 993.0; 118.1, 857.0; 119.0, 2186.0; 120.0, 575.0; 121.0, 1551.0; 121.9, 397.0; 123.0,                                                                                                                                                                                                                                                                                                                                                                                                                                                                                                                                                                                                                                                                                                                                                                                                                                                                                                                                                                                                                                                                                                                                                                                                                                                                                                                                                                                                             |
| 40 | 16.696 |                                                                                                                                                                                                                                                                                                                                                                                                                                                                                                                                                                                                                                                                                                                                                                                                                                                                                                                                                                                                                                                                                                                                                                                                                                                                                                                                                                                                                                                                                                                                                                                                                                                                                                                                                                                                                                                                                                                                                                                                                                                                                                                                                                                                                                                                                                                                                                                                                                                                                                      |
| 41 | 16.744 |                                                                                                                                                                                                                                                                                                                                                                                                                                                                                                                                                                                                                                                                                                                                                                                                                                                                                                                                                                                                                                                                                                                                                                                                                                                                                                                                                                                                                                                                                                                                                                                                                                                                                                                                                                                                                                                                                                                                                                                                                                                                                                                                                                                                                                                                                                                                                                                                                                                                                                      |

|    |        |                                                                                                                                                                                                                                                                                                                                                                                                                                                                                                                                                                                                                                                                                                                                                                                                                                                                                                                                                                                                                                                                                                                                                                                                                                                                                                                                                                                                                                                                                                                                                                                                                                                                                                                                                                                                                                                                                                                                                                                                                                                                                                                                                                     |
|----|--------|---------------------------------------------------------------------------------------------------------------------------------------------------------------------------------------------------------------------------------------------------------------------------------------------------------------------------------------------------------------------------------------------------------------------------------------------------------------------------------------------------------------------------------------------------------------------------------------------------------------------------------------------------------------------------------------------------------------------------------------------------------------------------------------------------------------------------------------------------------------------------------------------------------------------------------------------------------------------------------------------------------------------------------------------------------------------------------------------------------------------------------------------------------------------------------------------------------------------------------------------------------------------------------------------------------------------------------------------------------------------------------------------------------------------------------------------------------------------------------------------------------------------------------------------------------------------------------------------------------------------------------------------------------------------------------------------------------------------------------------------------------------------------------------------------------------------------------------------------------------------------------------------------------------------------------------------------------------------------------------------------------------------------------------------------------------------------------------------------------------------------------------------------------------------|
|    |        | 506.0; 124.0, 192.0; 125.1, 368.0; 125.9, 476.0; 126.9, 255.0; 128.1, 356.0; 129.0, 882.0; 129.9, 211.0; 131.0, 440.0; 132.1, 481.0; 133.0, 4025.0; 134.0, 907.0; 135.0, 2882.0; 136.1, 7364.0; 137.0, 1043.0; 137.9, 201.0; 139.1, 151.0; 141.0, 215.0; 142.1, 155.0; 143.0, 313.0; 145.0, 533.0; 146.1, 208.0; 147.0, 514.0; 148.1, 272.0; 149.0, 519.0; 150.0, 295.0; 151.0, 2970.0; 152.0, 550.0; 153.0, 347.0; 154.1, 212.0; 155.2, 187.0; 155.9, 243.0; 156.9, 267.0; 158.0, 150.0; 159.1, 405.0; 160.1, 374.0; 161.0, 589.0; 162.1, 725.0; 163.0, 519.0; 165.1, 1721.0; 166.0, 539.0; 167.1, 342.0; 168.0, 190.0; 171.0, 346.0; 173.1, 186.0; 175.2, 301.0; 175.9, 1272.0; 177.0, 4287.0; 178.0, 822.0; 179.0, 999.0; 180.0, 188.0; 181.1, 369.0; 184.0, 150.0; 185.1, 332.0; 189.0, 167.0; 191.1, 853.0; 192.1, 471.0; 193.0, 1104.0; 193.9, 541.0; 195.0, 278.0; 199.1, 1876.0; 200.1, 338.0; 201.1, 345.0; 204.9, 182.0; 207.0, 2872.0; 208.0, 871.0; 208.9, 535.0; 209.9, 151.0; 213.1, 273.0; 214.2, 431.0; 216.1, 371.0; 218.1, 274.0; 222.1, 670.0; 223.0, 299.0; 228.0, 182.0; 234.1, 266.0; 234.9, 574.0; 237.0, 197.0; 248.9, 155.0; 250.9, 573.0; 252.1, 188.0; 252.9, 604.0; 253.9, 152.0; 264.9, 175.0; 267.0, 2009.0; 268.1, 310.0; 269.0, 419.0; 281.0, 625.0; 282.1, 256.0; 283.0, 193.0; 309.1, 578.0; 310.0, 173.0; 310.9, 196.0; 325.0, 233.0; 326.9, 434.0; 330.8, 152.0; 341.0, 727.0; 342.0, 243.0                                                                                                                                                                                                                                                                                                                                                                                                                                                                                                                                                                                                                                                                                                                                     |
|    |        | 31.1, 249.0; 32.0, 528.0; 34.9, 206.0; 36.0, 676.0; 38.0, 411.0; 39.0, 930.0; 40.1, 200.0; 41.0, 1475.0; 42.0, 370.0; 43.1, 999.0; 44.0, 592.0; 45.0, 454.0; 50.0, 160.0; 51.0, 326.0; 52.0, 218.0; 53.0, 654.0; 54.0, 371.0; 55.1, 2063.0; 56.0, 375.0; 57.1, 420.0; 58.0, 354.0; 59.0, 276.0; 60.0, 252.0; 61.0, 217.0; 63.0, 211.0; 65.1, 484.0; 66.0, 151.0; 67.1, 629.0; 68.0, 555.0; 69.1, 1511.0; 70.0, 380.0; 71.0, 275.0; 73.1, 845.0; 74.1, 171.0; 75.0, 331.0; 76.1, 150.0; 77.0, 1521.0; 78.0, 388.0; 79.0, 873.0; 80.1, 281.0; 81.0, 873.0; 82.1, 1292.0; 83.1, 6398.0; 83.9, 583.0; 85.0, 252.0; 87.0, 204.0; 88.0, 159.0; 89.0, 323.0; 91.1, 1843.0; 91.9, 377.0; 93.1, 668.0; 94.1, 250.0; 95.0, 1764.0; 96.1, 503.0; 97.1, 494.0; 98.0, 327.0; 99.0, 237.0; 102.1, 171.0; 103.0, 699.0; 104.0, 338.0; 105.0, 890.0; 106.0, 247.0; 107.0, 670.0; 108.0, 440.0; 109.0, 1679.0; 110.1, 3217.0; 111.1, 653.0; 111.9, 184.0; 114.0, 154.0; 115.0, 761.0; 116.1, 164.0; 117.0, 749.0; 118.0, 790.0; 119.1, 1441.0; 120.0, 672.0; 121.1, 1475.0; 121.9, 292.0; 123.1, 550.0; 124.2, 180.0; 125.0, 891.0; 126.0, 748.0; 127.1, 238.0; 128.1, 240.0; 129.0, 423.0; 131.1, 322.0;                                                                                                                                                                                                                                                                                                                                                                                                                                                                                                                                                                                                                                                                                                                                                                                                                                                                                                                                                                            |
| 42 | 17.468 | 133.0, 4066.0; 134.0, 807.0; 135.0, 4622.0; 136.0, 952.0; 137.1, 4532.0; 138.0, 692.0; 139.0, 318.0; 143.0, 288.0; 145.0, 341.0; 146.2, 226.0; 147.0, 585.0; 147.9, 253.0; 149.1, 456.0; 150.0, 293.0; 151.1, 2989.0; 151.9, 448.0; 153.0, 386.0; 153.9, 470.0; 155.1, 187.0; 159.1, 377.0; 159.9, 168.0; 161.0, 470.0; 162.9, 346.0; 164.1, 362.0; 165.0, 439.0; 166.0, 224.0; 167.0, 201.0; 173.1, 158.0; 175.1, 207.0; 176.0, 1237.0; 177.0, 4484.0; 178.0, 854.0; 179.0, 913.0; 180.0, 226.0; 181.0, 285.0; 185.1, 293.0; 190.0, 169.0; 191.0, 787.0; 192.0, 391.0; 193.0, 1324.0; 194.0, 516.0; 194.9, 311.0; 196.9, 183.0; 199.0, 159.0; 201.1, 377.0; 202.2, 179.0; 203.1, 173.0; 204.9, 273.0; 207.0, 3748.0; 208.0, 990.0; 209.0, 741.0; 209.9, 198.0; 210.9, 165.0; 216.0, 284.0; 217.1, 475.0; 218.0, 235.0; 219.1, 218.0; 222.0, 154.0; 223.0, 205.0; 232.0, 304.0; 234.0, 564.0; 235.0, 662.0; 236.1, 161.0; 237.1, 178.0; 249.1, 158.0; 250.9, 735.0; 252.0, 182.0; 253.0, 642.0; 254.0, 172.0; 265.0, 215.0; 267.0, 1926.0; 268.0, 498.0; 268.9, 361.0; 281.0, 899.0; 281.9, 327.0; 283.0, 268.0; 308.0, 209.0; 309.0, 773.0; 309.9, 256.0; 311.1, 216.0; 324.9, 244.0; 326.9, 416.0; 329.1, 165.0; 341.0, 635.0; 342.1, 203.0; 343.0, 233.0; 401.1, 155.0                                                                                                                                                                                                                                                                                                                                                                                                                                                                                                                                                                                                                                                                                                                                                                                                                                                                                           |
|    |        | 31.1, 291.0; 32.0, 696.0; 36.0, 654.0; 38.0, 332.0; 39.0, 806.0; 40.0, 211.0; 41.1, 2415.0; 42.0, 693.0; 43.1, 2743.0; 44.1, 608.0; 44.9, 504.0; 50.0, 156.0; 51.0, 221.0; 52.1, 153.0; 53.0, 571.0; 54.0, 473.0; 55.0, 3173.0; 56.0, 747.0; 57.0, 1494.0; 58.1, 287.0; 59.0, 934.0; 60.0, 474.0; 60.9, 232.0; 63.0, 206.0; 64.9, 348.0; 66.0, 200.0; 67.1, 836.0; 68.0, 600.0; 69.1, 2111.0; 70.1, 649.0; 71.0, 766.0; 73.1, 1330.0; 74.0, 8496.0; 75.0, 2053.0; 76.0, 224.0; 77.0, 1365.0; 77.9, 337.0; 79.1, 736.0; 80.2, 246.0; 81.0, 931.0; 82.1, 661.0; 83.0, 3734.0; 84.0, 708.0; 85.0, 624.0; 87.0, 6543.0; 88.0, 720.0; 89.0, 426.0; 91.0, 1376.0; 92.0, 267.0; 93.0, 677.0; 94.0, 261.0; 95.1, 950.0; 96.1, 469.0; 97.0, 948.0; 98.1, 698.0; 99.0, 200.0; 100.9, 685.0; 102.0, 168.0; 102.9, 573.0; 104.1, 272.0; 104.9, 942.0; 106.1, 174.0; 107.0, 668.0; 108.0, 391.0; 109.1, 1012.0; 110.0, 1313.0; 111.2, 588.0; 112.0, 176.0; 114.0, 191.0; 115.0, 902.0; 116.1, 300.0; 117.1, 766.0; 118.1, 731.0; 119.0, 1564.0; 120.0, 636.0; 121.0, 1319.0; 121.9, 326.0; 123.0, 379.0; 124.1, 216.0; 125.0, 639.0; 126.0, 486.0; 126.7, 175.0; 127.1, 220.0; 128.0, 191.0; 129.0, 1280.0; 130.1, 199.0; 130.9, 284.0; 131.2, 276.0; 132.0, 422.0; 133.0, 3747.0; 134.1, 854.0; 135.0, 3462.0; 136.0, 763.0; 137.0, 1777.0; 138.1, 298.0; 139.0, 214.0; 141.1, 166.0; 143.1, 2404.0; 144.1, 333.0; 145.1, 365.0; 146.0, 204.0; 147.1, 674.0; 148.0, 300.0; 149.0, 460.0; 149.9, 286.0; 151.0, 2711.0; 151.9, 407.0; 153.1, 404.0; 154.0, 484.0; 156.0, 164.0; 157.0, 433.0; 158.0, 237.0; 159.0, 251.0; 160.0, 164.0; 161.0, 405.0; 161.9, 243.0; 163.0, 256.0; 164.0, 234.0; 165.0, 483.0; 166.1, 296.0; 166.9, 191.0; 171.1, 924.0; 172.0, 181.0; 173.1, 223.0; 175.0, 179.0; 176.0, 1275.0; 177.0, 3932.0; 178.0, 762.0; 179.0, 928.0; 179.8, 194.0; 181.0, 297.0; 185.1, 949.0; 191.0, 822.0; 191.9, 267.0; 192.2, 269.0; 193.0, 1342.0; 194.0, 467.0; 195.0, 413.0; 196.9, 174.0; 199.2, 905.0; 200.1, 225.0; 201.0, 285.0; 202.0, 185.0; 203.0, 335.0; 205.0, 232.0; 206.0, 163.0; 207.0, 3803.0; 208.0, 953.0; 208.9, 803.0; 211.0, 178.0; 213.3, 450.0; |

|    |        |                                                                                                                                                                                                                                                                                                                                                                                                                                                                                                                                                                                                                                                                                                                                                                                                                                                                                                                                                                                                                                                                                                                                                                                                                                                                                                                                                                                                                                                                                                                                                                                                                                                                                                                                                                                                                                                                                                                                                                                                                                                                                                                                                                                                                                                                                                                                                                                                                                                                                                                                                                                      |
|----|--------|--------------------------------------------------------------------------------------------------------------------------------------------------------------------------------------------------------------------------------------------------------------------------------------------------------------------------------------------------------------------------------------------------------------------------------------------------------------------------------------------------------------------------------------------------------------------------------------------------------------------------------------------------------------------------------------------------------------------------------------------------------------------------------------------------------------------------------------------------------------------------------------------------------------------------------------------------------------------------------------------------------------------------------------------------------------------------------------------------------------------------------------------------------------------------------------------------------------------------------------------------------------------------------------------------------------------------------------------------------------------------------------------------------------------------------------------------------------------------------------------------------------------------------------------------------------------------------------------------------------------------------------------------------------------------------------------------------------------------------------------------------------------------------------------------------------------------------------------------------------------------------------------------------------------------------------------------------------------------------------------------------------------------------------------------------------------------------------------------------------------------------------------------------------------------------------------------------------------------------------------------------------------------------------------------------------------------------------------------------------------------------------------------------------------------------------------------------------------------------------------------------------------------------------------------------------------------------------|
|    |        | 216.1, 305.0; 217.1, 161.0; 218.0, 249.0; 219.0, 183.0; 222.9, 225.0; 227.2, 2199.0; 228.2, 425.0; 232.0, 193.0; 234.0, 244.0; 234.9, 546.0; 236.0, 210.0; 237.1, 212.0; 239.2, 1005.0; 240.1, 240.0; 241.1, 578.0; 242.1, 167.0; 249.0, 274.0; 251.0, 594.0; 253.0, 534.0; 254.0, 162.0; 254.9, 231.0; 265.0, 186.0; 266.9, 2059.0; 267.9, 522.0; 268.9, 439.0; 270.2, 1855.0; 271.2, 320.0; 281.0, 992.0; 282.2, 246.0; 283.0, 214.0; 308.1, 243.0; 309.0, 796.0; 309.9, 199.0; 311.0, 151.0; 325.0, 180.0; 327.0, 384.0; 328.9, 171.0; 330.9, 189.0; 341.0, 555.0; 341.9, 237.0; 342.8, 168.0; 355.0, 280.0; 401.0, 195.0; 414.9, 164.0                                                                                                                                                                                                                                                                                                                                                                                                                                                                                                                                                                                                                                                                                                                                                                                                                                                                                                                                                                                                                                                                                                                                                                                                                                                                                                                                                                                                                                                                                                                                                                                                                                                                                                                                                                                                                                                                                                                                           |
|    |        | 31.0, 332.0; 32.0, 894.0; 34.9, 152.0; 36.0, 798.0; 37.9, 327.0; 39.1, 1429.0; 40.0, 394.0; 41.1, 6422.0; 42.1, 1310.0; 43.1, 7342.0; 44.0, 902.0; 45.0, 1297.0; 51.0, 206.0; 52.1, 222.0; 53.0, 877.0; 54.1, 782.0; 55.0, 7087.0; 56.0, 1622.0; 57.1, 6758.0; 58.0, 580.0; 59.0, 679.0; 60.0, 7906.0; 61.0, 2252.0; 63.0, 225.0; 63.9, 163.0; 64.9, 342.0; 66.0, 207.0; 67.0, 1428.0; 68.1, 1178.0; 69.1, 4678.0; 70.0, 1968.0; 71.1, 4071.0; 73.0, 12098.0; 74.0, 1021.0; 75.0, 602.0; 75.9, 153.0; 77.0, 1424.0; 78.0, 328.0; 79.1, 896.0; 80.0, 264.0; 81.0, 1306.0; 82.1, 1098.0; 83.0, 4711.0; 84.1, 2176.0; 85.1, 3571.0; 86.0, 466.0; 87.0, 2869.0; 88.1, 541.0; 89.0, 404.0; 91.1, 1161.0; 92.1, 228.0; 93.1, 784.0; 93.9, 402.0; 95.0, 1099.0; 96.0, 1146.0; 97.1, 3255.0; 98.0, 1953.0; 99.1, 1217.0; 100.0, 210.0; 101.1, 1487.0; 102.0, 499.0; 103.0, 638.0; 104.0, 209.0; 105.0, 1038.0; 106.1, 158.0; 107.0, 827.0; 107.9, 243.0; 109.0, 916.0; 110.0, 760.0; 111.1, 1578.0; 112.1, 666.0; 113.1, 903.0; 114.0, 230.0; 115.0, 3036.0; 116.1, 951.0; 117.0, 809.0; 118.0, 399.0; 119.0, 1424.0; 120.0, 446.0; 121.0, 1095.0; 122.1, 306.0; 123.0, 396.0; 124.1, 366.0; 125.0, 1015.0; 126.1, 693.0; 127.1, 630.0; 129.1, 7404.0; 130.0, 915.0; 131.0, 359.0; 132.0, 372.0; 133.0, 3924.0; 134.1, 672.0; 135.0, 2781.0; 136.0, 870.0; 137.0, 716.0; 138.1, 456.0; 139.0, 457.0;                                                                                                                                                                                                                                                                                                                                                                                                                                                                                                                                                                                                                                                                                                                                                                                                                                                                                                                                                                                                                                                                                                                                                                                         |
| 44 | 17.854 | 140.1, 217.0; 141.0, 416.0; 143.1, 1368.0; 144.1, 385.0; 145.0, 263.0; 146.0, 198.0; 147.0, 573.0; 148.0, 287.0; 149.0, 473.0; 150.1, 285.0; 151.0, 2689.0; 152.0, 592.0; 153.1, 405.0; 154.1, 878.0; 155.0, 415.0; 157.1, 2947.0; 158.0, 677.0; 159.1, 224.0; 160.2, 199.0; 160.9, 389.0; 162.1, 154.0; 162.9, 380.0; 163.7, 150.0; 164.9, 459.0; 166.0, 323.0; 167.1, 257.0; 168.1, 350.0; 171.1, 2627.0; 172.2, 560.0; 172.9, 227.0; 175.1, 213.0; 176.0, 867.0; 177.0, 4232.0; 178.0, 710.0; 179.0, 858.0; 179.9, 203.0; 181.1, 344.0; 185.1, 3255.0; 186.1, 503.0; 191.0, 924.0; 192.0, 414.0; 193.0, 1245.0; 194.1, 1362.0; 195.0, 465.0; 196.2, 443.0; 197.0, 222.0; 199.1, 1402.0; 200.3, 233.0; 202.9, 205.0; 205.0, 210.0; 207.0, 4228.0; 208.0, 990.0; 209.0, 906.0; 210.0, 232.0; 210.9, 167.0; 213.2, 4912.0; 214.2, 729.0; 215.0, 155.0; 216.1, 286.0; 218.1, 162.0; 220.2, 221.0; 220.9, 257.0; 223.0, 300.0; 227.2, 1056.0; 228.2, 366.0; 234.0, 297.0; 234.9, 692.0; 236.0, 212.0; 236.9, 252.0; 239.2, 181.0; 248.9, 198.0; 250.0, 186.0; 251.0, 679.0; 252.9, 678.0; 253.8, 172.0; 256.2, 6924.0; 257.2, 1209.0; 258.1, 159.0; 265.1, 208.0; 267.0, 2038.0; 267.9, 584.0; 269.0, 538.0; 281.0, 1039.0; 282.1, 305.0; 283.0, 304.0; 308.0, 187.0; 309.0, 633.0; 310.0, 258.0; 311.0, 258.0; 324.9, 243.0; 327.1, 494.0; 328.7, 173.0; 331.0, 185.0; 341.0, 934.0; 341.9, 204.0; 343.0, 191.0; 355.0, 235.0; 400.8, 198.0                                                                                                                                                                                                                                                                                                                                                                                                                                                                                                                                                                                                                                                                                                                                                                                                                                                                                                                                                                                                                                                                                                                                           |
|    |        | 31.1, 353.0; 32.1, 612.0; 34.9, 171.0; 35.9, 564.0; 38.0, 257.0; 39.0, 1849.0; 40.0, 531.0; 41.1, 8872.0; 42.0, 1905.0; 43.1, 6118.0; 44.0, 970.0; 45.0, 1791.0; 46.9, 164.0; 50.0, 166.0; 51.0, 309.0; 52.0, 245.0; 53.0, 1554.0; 54.1, 3659.0; 55.1, 14384.0; 56.1, 4128.0; 57.0, 5023.0; 58.1, 1260.0; 59.1, 1025.0; 60.0, 2123.0; 61.1, 371.0; 62.9, 209.0; 65.0, 759.0; 66.0, 599.0; 67.1, 6670.0; 68.1, 4175.0; 69.1, 11356.0; 70.1, 4716.0; 71.0, 2677.0; 72.0, 318.0; 73.0, 4063.0; 73.9, 547.0; 75.0, 528.0; 75.9, 193.0; 77.0, 2610.0; 78.0, 600.0; 79.1, 2715.0; 80.1, 1226.0; 81.1, 6785.0; 82.1, 5175.0; 83.1, 10597.0; 84.1, 6298.0; 85.0, 1903.0; 86.0, 275.0; 87.0, 1258.0; 88.0, 266.0; 89.0, 641.0; 91.1, 1768.0; 92.1, 438.0; 93.0, 1244.0; 94.1, 1154.0; 95.1, 5333.0; 96.1, 5744.0; 97.1, 9494.0; 98.0, 5496.0; 99.0, 1192.0; 100.1, 1067.0; 100.9, 1474.0; 102.0, 337.0; 102.9, 621.0; 104.0, 288.0; 105.0, 1179.0; 106.0, 291.0; 107.1, 1372.0; 108.0, 1267.0; 109.1, 3323.0; 110.1, 3818.0; 111.1, 4710.0; 112.1, 1978.0; 113.1, 946.0; 114.1, 1720.0; 115.0, 1482.0; 116.0, 398.0; 117.0, 628.0; 118.0, 554.0; 119.1, 1883.0; 120.1, 583.0; 121.0, 1463.0; 122.0, 810.0; 123.1, 3031.0; 124.0, 2295.0; 125.1, 2501.0; 126.1, 1301.0; 127.0, 1470.0; 128.0, 763.0; 129.1, 1235.0; 129.9, 307.0; 131.0, 415.0; 131.9, 268.0; 133.0, 5121.0; 134.1, 1601.0; 135.0, 3871.0; 136.0, 1168.0; 137.1, 2299.0; 138.1, 1732.0; 139.1, 1650.0; 140.0, 562.0; 141.0, 601.0; 142.0, 216.0; 143.1, 446.0; 144.0, 186.0; 145.0, 411.0; 146.0, 252.0; 147.0, 1530.0; 148.1, 795.0; 149.1, 980.0; 150.1, 627.0; 151.1, 3585.0; 152.0, 1446.0; 153.1, 963.0; 154.2, 518.0; 155.1, 495.0; 156.0, 262.0; 157.1, 452.0; 158.1, 281.0; 159.1, 242.0; 160.1, 229.0; 161.1, 847.0; 162.1, 389.0; 163.1, 671.0; 164.2, 535.0; 165.0, 1375.0; 166.1, 930.0; 167.1, 678.0; 168.1, 237.0; 169.1, 393.0; 170.1, 176.0; 171.1, 377.0; 172.1, 192.0; 173.0, 173.0; 175.1, 543.0; 176.0, 1482.0; 177.0, 4437.0; 178.0, 963.0; 179.1, 1598.0; 180.2, 1270.0; 181.1, 711.0; 182.2, 294.0; 183.1, 270.0; 185.0, 558.0; 186.1, 334.0; 187.0, 201.0; 189.1, 361.0; 191.0, 1251.0; 192.1, 700.0; 193.0, 2268.0; 194.1, 754.0; 195.1, 681.0; 196.1, 188.0; 197.0, 317.0; 198.1, 203.0; 199.1, 392.0; 200.1, 251.0; 201.0, 203.0; 202.0, 208.0; 202.9, 363.0; 205.0, 371.0; 207.1, 6326.0; 208.1, 1596.0; 209.0, 1482.0; 210.1, 351.0; 211.0, 276.0; 213.1, 198.0; 214.0, 208.0; 216.1, 319.0; 218.1, 302.0; 219.0, 183.0; 220.2, 1216.0; 221.1, 1213.0; 222.2, 1541.0; 223.0, 645.0; 224.0, 156.0; |

|    |        |                                                                                                                                                                                                                                                                                                                                                                                                                                                                                                                                                                                                                                                                                                                                                                                                                                                                                                                                                                                                                                                                                                                                                                                                                                                                                                                                                                                                                                                                                                                                                                                                                                                                                                                                                                                                                                                                                                                                                                                                                                                                                                                                                                                                                                                                                                                                                                                                                                                                                                                                                                                                                                                                                                                                                                                                                                                                                                                                                                                               |
|----|--------|-----------------------------------------------------------------------------------------------------------------------------------------------------------------------------------------------------------------------------------------------------------------------------------------------------------------------------------------------------------------------------------------------------------------------------------------------------------------------------------------------------------------------------------------------------------------------------------------------------------------------------------------------------------------------------------------------------------------------------------------------------------------------------------------------------------------------------------------------------------------------------------------------------------------------------------------------------------------------------------------------------------------------------------------------------------------------------------------------------------------------------------------------------------------------------------------------------------------------------------------------------------------------------------------------------------------------------------------------------------------------------------------------------------------------------------------------------------------------------------------------------------------------------------------------------------------------------------------------------------------------------------------------------------------------------------------------------------------------------------------------------------------------------------------------------------------------------------------------------------------------------------------------------------------------------------------------------------------------------------------------------------------------------------------------------------------------------------------------------------------------------------------------------------------------------------------------------------------------------------------------------------------------------------------------------------------------------------------------------------------------------------------------------------------------------------------------------------------------------------------------------------------------------------------------------------------------------------------------------------------------------------------------------------------------------------------------------------------------------------------------------------------------------------------------------------------------------------------------------------------------------------------------------------------------------------------------------------------------------------------------|
|    |        | 228.2, 268.0; 233.0, 211.0; 234.0, 460.0; 235.1, 1672.0; 236.1, 617.0; 237.0, 814.0; 239.2, 254.0; 246.2, 266.0; 249.0, 430.0; 250.0, 200.0; 251.0, 1101.0; 252.0, 225.0; 253.0, 1166.0; 254.0, 351.0; 255.0, 288.0; 256.0, 257.0; 264.2, 4577.0; 265.1, 1148.0; 267.0, 2402.0; 268.1, 735.0; 268.8, 573.0; 269.9, 178.0; 280.2, 603.0; 281.1, 1668.0; 282.1, 1177.0; 283.0, 523.0; 284.2, 234.0; 297.0, 239.0; 308.0, 287.0; 309.1, 851.0; 310.0, 330.0; 310.9, 273.0; 312.9, 193.0; 325.0, 442.0; 326.9, 552.0; 328.0, 190.0; 328.9, 213.0; 331.1, 259.0; 341.1, 957.0; 342.0, 383.0; 343.0, 269.0; 351.0, 164.0; 355.0, 421.0; 382.9, 201.0; 400.9, 323.0; 402.8, 157.0; 415.0, 176.0; 425.1, 220.0                                                                                                                                                                                                                                                                                                                                                                                                                                                                                                                                                                                                                                                                                                                                                                                                                                                                                                                                                                                                                                                                                                                                                                                                                                                                                                                                                                                                                                                                                                                                                                                                                                                                                                                                                                                                                                                                                                                                                                                                                                                                                                                                                                                                                                                                                        |
| 46 | 19.741 | 31.0, 367.0; 32.0, 662.0; 36.0, 559.0; 38.1, 193.0; 39.0, 728.0; 40.1, 262.0; 41.1, 1960.0; 42.1, 646.0; 43.1, 1757.0; 44.0, 817.0; 45.0, 1097.0; 53.0, 465.0; 54.0, 624.0; 55.0, 2389.0; 56.0, 694.0; 57.1, 1430.0; 58.0, 990.0; 59.0, 495.0; 60.0, 1149.0; 61.0, 432.0; 62.9, 232.0; 65.0, 398.0; 67.0, 1270.0; 67.9, 823.0; 69.1, 1920.0; 70.0, 848.0; 71.0, 918.0; 72.1, 215.0; 73.1, 2474.0; 74.0, 377.0; 75.0, 602.0; 76.0, 215.0; 77.0, 2027.0; 78.0, 364.0; 79.1, 964.0; 80.1, 380.0; 81.0, 1240.0; 82.0, 902.0; 83.1, 2356.0; 84.1, 1067.0; 85.1, 804.0; 86.1, 150.0; 87.0, 589.0; 88.0, 192.0; 89.1, 473.0; 91.0, 983.0; 92.0, 297.0; 93.1, 418.0; 94.0, 331.0; 95.1, 1066.0; 96.0, 1389.0; 97.0, 1499.0; 98.0, 1057.0; 99.0, 332.0; 101.0, 413.0; 102.1, 181.0; 103.0, 698.0; 103.8, 265.0; 104.9, 864.0; 106.0, 289.0; 107.0, 544.0; 108.0, 337.0; 109.1, 670.0; 110.1, 754.0; 111.1, 860.0; 112.0, 397.0; 113.0, 284.0; 114.1, 279.0; 115.0, 851.0; 116.1, 317.0; 117.0, 667.0; 118.1, 486.0; 119.1, 1377.0; 120.0, 296.0; 121.0, 780.0; 121.9, 211.0; 123.0, 486.0; 124.0, 354.0; 125.0, 458.0; 126.0, 556.0; 126.9, 364.0; 128.0, 270.0; 129.1, 1089.0; 130.0, 261.0; 131.0, 281.0; 131.9, 372.0; 133.0, 4312.0; 134.0, 813.0; 135.0, 2632.0; 136.0, 593.0; 137.0, 651.0; 138.0, 319.0; 138.9, 315.0; 141.1, 229.0; 143.2, 274.0; 144.8, 218.0; 146.2, 175.0; 147.0, 804.0; 148.0, 401.0; 149.0, 528.0; 150.1, 317.0; 151.0, 2647.0; 152.0, 478.0; 153.0, 366.0; 154.0, 233.0; 155.1, 305.0; 155.9, 156.0; 157.1, 270.0; 158.1, 183.0; 159.0, 285.0; 159.9, 201.0; 160.9, 613.0; 162.1, 229.0; 163.0, 591.0; 163.8, 230.0; 164.1, 211.0; 165.0, 453.0; 166.0, 258.0; 167.0, 287.0; 168.1, 202.0; 171.0, 359.0; 174.9, 240.0; 175.9, 911.0; 177.0, 3851.0; 178.0, 886.0; 179.0, 1074.0; 179.9, 320.0; 181.0, 203.0; 185.2, 600.0; 186.0, 210.0; 189.0, 166.0; 191.0, 1095.0; 192.1, 368.0; 193.0, 2057.0; 194.0, 529.0; 194.9, 417.0; 199.0, 347.0; 201.1, 171.0; 202.0, 156.0; 203.0, 395.0; 203.9, 167.0; 204.9, 212.0; 207.0, 7148.0; 208.0, 1657.0; 209.0, 1476.0; 210.0, 206.0; 211.1, 226.0; 213.2, 202.0; 214.0, 201.0; 216.1, 250.0; 217.1, 195.0; 218.0, 219.0; 220.1, 215.0; 221.0, 298.0; 222.0, 160.0; 223.0, 575.0; 223.9, 273.0; 227.0, 224.0; 228.1, 169.0; 232.0, 163.0; 232.9, 314.0; 234.0, 335.0; 235.0, 1099.0; 236.0, 412.0; 237.0, 300.0; 238.9, 170.0; 241.2, 444.0; 249.0, 429.0; 250.0, 371.0; 251.0, 896.0; 252.0, 220.0; 253.0, 1162.0; 253.9, 234.0; 254.9, 427.0; 264.2, 401.0; 265.1, 351.0; 267.0, 2630.0; 268.0, 676.0; 269.0, 729.0; 281.1, 2334.0; 282.1, 677.0; 283.0, 431.0; 284.2, 1000.0; 285.3, 205.0; 296.8, 185.0; 308.1, 267.0; 309.0, 839.0; 310.0, 284.0; 311.0, 250.0; 324.9, 577.0; 326.1, 203.0; 326.9, 748.0; 328.0, 224.0; 329.0, 267.0; 331.0, 298.0; 331.9, 164.0; 341.0, 1174.0; 342.1, 349.0; 343.1, 269.0; 346.0, 173.0; 351.1, 234.0; 355.1, 465.0; 357.0, 185.0; 383.0, 197.0; 400.9, 265.0; 402.9, 177.0; 415.1, 173.0 |
| 47 | 24.121 | 31.0, 393.0; 32.0, 677.0; 36.0, 460.0; 39.0, 538.0; 40.0, 158.0; 41.1, 1074.0; 42.0, 451.0; 43.1, 1344.0; 44.0, 999.0; 45.0, 3078.0; 46.9, 235.0; 50.0, 185.0; 51.0, 316.0; 53.1, 332.0; 53.9, 219.0; 55.0, 1099.0; 56.0, 448.0; 57.1, 1104.0; 58.0, 776.0; 58.9, 728.0; 60.0, 357.0; 61.0, 459.0; 62.0, 204.0; 62.9, 290.0; 64.1, 175.0; 65.1, 449.0; 66.0, 202.0; 67.0, 658.0; 68.1, 466.0; 69.0, 572.0; 70.1, 282.0; 71.1, 440.0; 71.9, 349.0; 73.1, 3910.0; 73.9, 506.0; 75.0, 1179.0; 76.1, 370.0; 77.0, 5769.0; 78.0, 884.0; 79.0, 859.0; 80.0, 274.0; 81.0, 893.0; 81.9, 494.0; 83.1, 909.0; 84.1, 372.0; 84.9, 330.0; 86.9, 678.0; 87.9, 482.0; 89.0, 1522.0; 90.1, 311.0; 91.1, 2078.0; 92.1, 355.0; 93.1, 301.0; 94.1, 193.0; 95.1, 725.0; 96.0, 1975.0; 97.1, 856.0; 98.1, 346.0; 98.9, 259.0; 101.2, 334.0; 102.0, 268.0; 103.0, 1997.0; 103.9, 388.0; 104.2, 358.0; 105.0, 1299.0; 106.0, 328.0; 107.0, 1102.0; 108.1, 237.0; 109.2, 465.0; 110.0, 433.0; 111.1, 321.0; 113.0, 192.0; 114.1, 257.0; 115.1, 1855.0; 116.0, 420.0; 116.9, 1336.0; 118.1, 721.0; 119.0, 2196.0; 120.0, 581.0; 120.9, 980.0; 121.9, 247.0; 123.1, 327.0; 124.0, 235.0; 125.0, 283.0; 125.9, 1264.0; 126.7, 501.0; 128.1, 387.0; 129.0, 458.0; 130.1, 265.0; 131.1, 1026.0; 132.0, 608.0; 133.0, 7266.0; 134.0, 1434.0; 135.0, 6869.0; 136.0, 1141.0; 137.0, 646.0; 138.0, 177.0; 138.9, 236.0; 141.1, 256.0; 141.8, 158.0; 142.9, 278.0; 144.0, 174.0; 145.0, 520.0; 146.1, 834.0; 147.0, 2527.0; 148.0, 770.0; 149.1, 1185.0; 151.0, 3786.0; 152.0, 810.0; 153.0, 569.0; 154.0, 468.0; 154.9, 481.0; 155.9, 661.0; 156.8, 445.0; 158.0, 424.0; 159.0, 250.0; 160.1, 378.0; 161.1, 1562.0; 162.1, 525.0; 163.1, 1441.0; 163.9, 456.0; 165.1, 1146.0; 166.0, 373.0; 167.1, 286.0; 168.0, 307.0; 171.1, 259.0; 174.0, 177.0; 175.0, 556.0; 176.0, 1617.0; 177.0, 4777.0; 177.9, 1162.0; 179.0, 2549.0; 180.0, 445.0; 180.9, 524.0; 181.8, 170.0; 185.1, 254.0; 186.1, 174.0; 186.9, 232.0; 189.0, 389.0; 189.9, 249.0; 191.0, 3875.0; 192.1, 868.0; 193.0, 4571.0; 194.0, 1255.0; 194.9, 1247.0; 195.9, 226.0; 197.0, 742.0; 198.0, 287.0; 199.1, 252.0; 202.1, 387.0; 203.0, 1348.0; 204.0, 378.0; 205.0, 1053.0; 207.0, 27368.0; 208.0, 5597.0; 209.0, 4246.0; 210.0, 832.0; 210.9, 477.0; 211.8, 195.0; 213.0, 282.0; 214.9, 169.0; 216.1, 160.0; 217.2, 283.0; 218.0,                                                                                                                                                                                                                                                                                                                                                                                                                                                                                                                                                                                                                              |

|           |                                                                                                                                                                                                                                                                                                                                                                                                                                                                                                                                                                                                                                                                                                                                                                                                                                                                                                                                                                                                                                                                                                                                                                                                                                                                                                                                                                                                                                                                                                                                                                                                                                                                                                                                                                                                                                                                                                                                                                                                                                                                                                                                                                                                                                                       |
|-----------|-------------------------------------------------------------------------------------------------------------------------------------------------------------------------------------------------------------------------------------------------------------------------------------------------------------------------------------------------------------------------------------------------------------------------------------------------------------------------------------------------------------------------------------------------------------------------------------------------------------------------------------------------------------------------------------------------------------------------------------------------------------------------------------------------------------------------------------------------------------------------------------------------------------------------------------------------------------------------------------------------------------------------------------------------------------------------------------------------------------------------------------------------------------------------------------------------------------------------------------------------------------------------------------------------------------------------------------------------------------------------------------------------------------------------------------------------------------------------------------------------------------------------------------------------------------------------------------------------------------------------------------------------------------------------------------------------------------------------------------------------------------------------------------------------------------------------------------------------------------------------------------------------------------------------------------------------------------------------------------------------------------------------------------------------------------------------------------------------------------------------------------------------------------------------------------------------------------------------------------------------------|
|           | 368.0; 219.0, 314.0; 220.0, 194.0; 221.0, 731.0; 221.9, 274.0; 223.1, 7166.0; 224.1, 1277.0; 225.0, 463.0; 229.1, 193.0; 231.1, 212.0; 232.2, 350.0; 232.9, 1000.0; 234.0, 717.0; 235.0, 2563.0; 236.0, 703.0; 237.0, 1185.0; 237.9, 368.0; 238.9, 456.0; 240.0, 210.0; 241.0, 206.0; 246.0, 192.0; 247.1, 191.0; 248.0, 235.0; 249.0, 1134.0; 250.0, 544.0; 251.0, 2530.0; 252.1, 770.0; 253.0, 4320.0; 254.0, 1192.0; 255.0, 1555.0; 256.0, 326.0; 256.9, 316.0; 259.0, 177.0; 262.1, 167.0; 263.0, 330.0; 264.0, 312.0; 265.1, 867.0; 266.0, 368.0; 267.0, 4655.0; 268.1, 1207.0; 269.0, 1844.0; 269.9, 546.0; 271.1, 531.0; 272.0, 153.0; 275.0, 191.0; 277.1, 261.0; 278.1, 175.0; 279.0, 519.0; 281.1, 6288.0; 282.1, 1983.0; 283.1, 1216.0; 284.1, 448.0; 285.0, 285.0; 286.2, 1287.0; 287.0, 261.0; 291.9, 209.0; 293.0, 539.0; 294.1, 654.0; 295.1, 1352.0; 296.1, 2363.0; 297.1, 1116.0; 298.1, 454.0; 298.9, 258.0; 307.0, 279.0; 308.1, 644.0; 309.0, 2482.0; 309.9, 762.0; 311.0, 826.0; 312.0, 603.0; 313.1, 444.0; 314.1, 179.0; 314.8, 520.0; 315.9, 201.0; 320.8, 156.0; 321.9, 189.0; 323.1, 810.0; 324.1, 390.0; 325.0, 1406.0; 326.0, 990.0; 327.1, 3102.0; 328.0, 912.0; 329.0, 927.0; 329.9, 314.0; 330.2, 312.0; 331.1, 1472.0; 332.1, 504.0; 332.9, 224.0; 334.9, 295.0; 337.0, 172.0; 339.0, 253.0; 341.0, 2935.0; 342.0, 963.0; 343.1, 1181.0; 344.1, 265.0; 345.1, 182.0; 346.0, 771.0; 347.0, 327.0; 349.0, 289.0; 350.0, 1086.0; 351.1, 2088.0; 352.0, 777.0; 353.0, 420.0; 354.3, 229.0; 355.0, 1837.0; 356.2, 722.0; 357.0, 534.0; 358.1, 154.0; 359.1, 172.0; 368.1, 211.0; 369.0, 349.0; 370.2, 2402.0; 371.1, 1250.0; 372.1, 274.0; 372.8, 202.0; 377.0, 324.0; 382.0, 284.0; 383.0, 782.0; 384.0, 246.0; 385.0, 338.0; 386.1, 185.0; 387.1, 328.0; 389.1, 298.0; 397.0, 499.0; 398.0, 155.0; 399.1, 455.0; 400.1, 171.0; 401.0, 773.0; 401.8, 297.0; 403.0, 623.0; 403.9, 167.0; 405.2, 601.0; 406.2, 177.0; 407.1, 162.0; 414.3, 390.0; 415.2, 723.0; 416.1, 272.0; 417.0, 319.0; 424.2, 558.0; 425.0, 1240.0; 425.9, 546.0; 427.0, 380.0; 429.1, 466.0; 430.0, 215.0; 431.0, 210.0; 445.1, 240.0; 457.1, 203.0; 459.0, 150.0; 461.0, 257.0; 479.1, 153.0; 498.2, 165.0; 499.1, 525.0; 500.1, 341.0; 501.2, 209.0 |
|           | 31.1, 400.0; 32.0, 692.0; 35.9, 439.0; 38.0, 250.0; 38.9, 436.0; 39.9, 164.0; 41.0, 1221.0; 42.1, 490.0; 43.0, 1127.0; 44.0, 1029.0; 45.0, 2832.0; 50.0, 190.0; 50.9, 271.0; 53.0, 379.0; 54.0, 259.0; 55.0, 1175.0; 56.1, 452.0; 57.0, 906.0; 58.0, 628.0; 59.0, 937.0; 60.0, 345.0; 61.0, 518.0; 62.0, 173.0; 63.1, 363.0; 65.0, 432.0; 66.0, 172.0; 67.0, 569.0; 68.1, 602.0; 69.0, 569.0; 69.9, 243.0; 71.0, 338.0; 72.0, 174.0; 73.1, 3710.0; 73.9, 592.0; 75.0, 1368.0; 76.1, 375.0; 77.0, 5995.0; 78.1, 646.0; 79.0, 862.0; 79.9, 223.0; 81.0, 785.0; 81.9, 526.0; 83.0, 758.0; 84.1, 250.0; 85.0, 364.0; 86.0, 191.0; 87.0, 701.0; 88.0, 531.0; 89.1, 1396.0; 89.9, 236.0; 90.2, 230.0; 91.0, 1869.0; 91.9, 332.0; 93.1, 364.0; 94.0, 222.0; 95.0, 581.0; 96.0, 2206.0; 96.9, 801.0; 98.1, 356.0; 99.1, 203.0; 101.1, 439.0; 101.9, 413.0; 103.0, 1776.0; 103.9, 554.0; 105.0, 1215.0; 105.9, 325.0; 107.1, 979.0; 107.9, 287.0; 109.1, 411.0; 110.0, 523.0; 111.0, 353.0; 112.1, 234.0; 112.9, 191.0; 114.1, 236.0; 115.1, 1810.0; 116.0, 581.0; 117.0, 1501.0; 118.0, 704.0; 119.0, 1947.0; 120.0, 447.0; 121.0, 823.0; 122.0, 312.0; 123.0, 257.0; 124.0, 233.0; 124.8, 364.0; 126.0, 1293.0; 126.8, 538.0; 128.0, 380.0; 129.0, 695.0; 130.1, 224.0; 131.0, 818.0; 133.0, 7203.0; 134.0, 1592.0; 135.0, 7190.0; 136.0, 909.0; 137.0, 645.0; 138.0, 174.0; 139.2, 255.0; 140.1, 238.0; 141.0, 379.0; 143.1, 276.0; 144.1, 183.0; 145.1, 400.0; 146.0, 400.0; 147.0, 2888.0; 148.0, 954.0; 149.0, 1302.0; 151.0, 3521.0; 152.0, 865.0; 153.1, 456.0; 154.0, 537.0; 155.1, 470.0; 156.1, 433.0; 156.9, 474.0; 158.1, 385.0; 158.9, 591.0; 160.0, 502.0; 161.0, 1646.0; 162.0, 538.0; 163.0, 1298.0; 163.9, 577.0; 165.0, 1220.0; 165.7, 386.0; 167.0, 331.0; 168.1, 260.0; 168.7, 179.0; 170.9, 219.0; 173.0, 273.0;                                                                                                                                                                                                                                                                                                                                                                                                                         |
| 48 24.240 | 174.1, 539.0; 175.1, 688.0; 176.0, 1532.0; 177.0, 4493.0; 178.0, 1269.0; 179.1, 2563.0; 180.0, 539.0; 181.0, 500.0; 182.0, 167.0; 182.9, 153.0; 185.0, 247.0; 186.1, 196.0; 187.0, 363.0; 188.1, 237.0; 189.1, 731.0; 189.9, 449.0; 191.0, 3445.0; 192.0, 1253.0; 193.0, 4311.0; 194.0, 1195.0; 195.0, 1217.0; 195.9, 295.0; 196.9, 770.0; 197.8, 259.0; 199.0, 252.0; 201.0, 340.0; 202.0, 548.0; 203.0, 1591.0; 204.0, 357.0; 205.1, 1138.0; 207.0, 27920.0; 208.0, 5701.0; 209.0, 4728.0; 209.9, 668.0; 211.0, 377.0; 212.0, 183.0; 213.1, 316.0; 215.0, 164.0; 216.0, 174.0; 216.9, 219.0; 218.0, 444.0; 219.1, 434.0; 220.0, 325.0; 221.0, 690.0; 223.1, 6539.0; 224.0, 975.0; 224.9, 491.0; 226.0, 151.0; 226.9, 164.0; 232.0, 194.0; 233.0, 799.0; 234.0, 816.0; 234.9, 2272.0; 236.0, 772.0; 237.0, 1241.0; 238.0, 424.0; 239.0, 496.0; 239.9, 175.0; 241.0, 234.0; 246.9, 182.0; 248.0, 189.0; 249.0, 1335.0; 251.0, 2630.0; 252.0, 720.0; 253.0, 4320.0; 254.0, 1195.0; 255.0, 1156.0; 256.0, 318.0; 257.0, 331.0; 262.1, 208.0; 263.0, 412.0; 264.0, 183.0; 264.9, 907.0; 267.0, 5206.0; 268.0, 1625.0; 269.1, 1722.0; 270.0, 403.0; 271.0, 296.0; 275.0, 190.0; 276.0, 153.0; 277.0, 481.0; 277.9, 239.0; 279.0, 529.0; 281.1, 6553.0; 282.1, 1980.0; 283.0, 1401.0; 284.1, 238.0; 285.0, 245.0; 286.1, 380.0; 287.0, 152.0; 292.1, 267.0; 292.9, 580.0; 294.0, 606.0; 295.0, 1194.0; 296.1, 504.0; 297.0, 724.0; 298.0, 257.0; 299.0, 209.0; 301.0, 188.0; 307.0, 288.0; 308.1, 618.0; 309.1, 3043.0; 310.0, 717.0; 311.0, 1019.0; 312.1, 209.0; 313.1, 427.0; 315.0, 513.0; 316.0, 193.0; 321.0, 239.0; 322.1, 210.0; 323.2, 795.0; 324.2, 6029.0; 325.1, 2552.0; 326.2, 833.0; 327.0, 2121.0; 328.0, 723.0; 329.0, 928.0; 330.0, 293.0; 331.1, 1711.0; 332.0, 535.0; 333.1, 245.0; 334.9, 316.0; 337.1, 152.0; 338.9, 260.0; 341.0, 3059.0; 342.0, 1144.0; 343.1, 898.0; 344.1, 278.0; 345.0, 180.0; 346.1,                                                                                                                                                                                                                                                                                                                            |

|    |                                                                                                                                                                                                                                                                                                                                                                                                                                                                                                                                                                                                                                                                                                                                                                                                                           |                                                                                                                                                                                                                                                                                                                                                                                                                                                                                                                                                                                                                                                                                                                                                                                                                                                                                                                                                                                                                                                                                                                                                                                                                                                                                                                                                                                                                                                                                                                                                                                                                                                                                                                                                                                                                                                                                                                                                                                                                                                                                                                                                                                                                                                                                                                                                                                                                                                                                                                                                                                                                                                                                                                                                                                                                                                                                                                                                                                                                                                                                                                                                                                                                                                                                                                                                                                                                                                                                                                                                                                                                                                                                                                                                                                                                                                                                                                                                                                                                                                                                                                                                                                                                                                                                                                                                                                                                                                                                                                                                                                                                                                                                                                                                                                                                                                                                                                                                                                                                                                                                                                       |
|----|---------------------------------------------------------------------------------------------------------------------------------------------------------------------------------------------------------------------------------------------------------------------------------------------------------------------------------------------------------------------------------------------------------------------------------------------------------------------------------------------------------------------------------------------------------------------------------------------------------------------------------------------------------------------------------------------------------------------------------------------------------------------------------------------------------------------------|-----------------------------------------------------------------------------------------------------------------------------------------------------------------------------------------------------------------------------------------------------------------------------------------------------------------------------------------------------------------------------------------------------------------------------------------------------------------------------------------------------------------------------------------------------------------------------------------------------------------------------------------------------------------------------------------------------------------------------------------------------------------------------------------------------------------------------------------------------------------------------------------------------------------------------------------------------------------------------------------------------------------------------------------------------------------------------------------------------------------------------------------------------------------------------------------------------------------------------------------------------------------------------------------------------------------------------------------------------------------------------------------------------------------------------------------------------------------------------------------------------------------------------------------------------------------------------------------------------------------------------------------------------------------------------------------------------------------------------------------------------------------------------------------------------------------------------------------------------------------------------------------------------------------------------------------------------------------------------------------------------------------------------------------------------------------------------------------------------------------------------------------------------------------------------------------------------------------------------------------------------------------------------------------------------------------------------------------------------------------------------------------------------------------------------------------------------------------------------------------------------------------------------------------------------------------------------------------------------------------------------------------------------------------------------------------------------------------------------------------------------------------------------------------------------------------------------------------------------------------------------------------------------------------------------------------------------------------------------------------------------------------------------------------------------------------------------------------------------------------------------------------------------------------------------------------------------------------------------------------------------------------------------------------------------------------------------------------------------------------------------------------------------------------------------------------------------------------------------------------------------------------------------------------------------------------------------------------------------------------------------------------------------------------------------------------------------------------------------------------------------------------------------------------------------------------------------------------------------------------------------------------------------------------------------------------------------------------------------------------------------------------------------------------------------------------------------------------------------------------------------------------------------------------------------------------------------------------------------------------------------------------------------------------------------------------------------------------------------------------------------------------------------------------------------------------------------------------------------------------------------------------------------------------------------------------------------------------------------------------------------------------------------------------------------------------------------------------------------------------------------------------------------------------------------------------------------------------------------------------------------------------------------------------------------------------------------------------------------------------------------------------------------------------------------------------------------------------------------------------------|
|    | 669.0; 347.0, 377.0; 348.0, 190.0; 349.2, 248.0; 350.1, 1053.0; 351.0, 2359.0; 352.1, 913.0; 353.0, 601.0; 355.1, 1784.0; 356.1, 656.0; 357.0, 592.0; 358.0, 251.0; 368.1, 205.0; 369.1, 320.0; 370.2, 561.0; 371.1, 613.0; 372.0, 238.0; 377.1, 346.0; 377.9, 174.0; 382.0, 324.0; 383.0, 976.0; 383.9, 287.0; 385.0, 427.0; 386.0, 213.0; 387.0, 287.0; 388.9, 327.0; 397.1, 351.0; 398.0, 196.0; 398.9, 384.0; 400.0, 173.0; 401.0, 931.0; 402.0, 267.0; 402.9, 520.0; 404.2, 271.0; 405.0, 595.0; 406.0, 238.0; 415.0, 685.0; 416.1, 303.0; 417.2, 254.0; 423.0, 150.0; 424.1, 686.0; 425.1, 1306.0; 426.1, 638.0; 426.9, 310.0; 429.0, 448.0; 429.8, 195.0; 430.2, 152.0; 431.1, 294.0; 445.1, 327.0; 446.0, 165.0; 460.8, 239.0; 462.9, 158.0; 475.0, 190.0; 477.0, 161.0; 497.9, 158.0; 499.1, 532.0; 500.1, 250.0 |                                                                                                                                                                                                                                                                                                                                                                                                                                                                                                                                                                                                                                                                                                                                                                                                                                                                                                                                                                                                                                                                                                                                                                                                                                                                                                                                                                                                                                                                                                                                                                                                                                                                                                                                                                                                                                                                                                                                                                                                                                                                                                                                                                                                                                                                                                                                                                                                                                                                                                                                                                                                                                                                                                                                                                                                                                                                                                                                                                                                                                                                                                                                                                                                                                                                                                                                                                                                                                                                                                                                                                                                                                                                                                                                                                                                                                                                                                                                                                                                                                                                                                                                                                                                                                                                                                                                                                                                                                                                                                                                                                                                                                                                                                                                                                                                                                                                                                                                                                                                                                                                                                                       |
| 49 | 24.952                                                                                                                                                                                                                                                                                                                                                                                                                                                                                                                                                                                                                                                                                                                                                                                                                    | 31.1, 450.0; 32.0, 645.0; 36.0, 389.0; 38.0, 251.0; 39.0, 518.0; 40.0, 171.0; 41.1, 1241.0; 42.1, 449.0; 43.0, 1500.0; 44.0, 1035.0; 45.0, 2596.0; 47.0, 219.0; 49.9, 266.0; 50.9, 315.0; 52.0, 234.0; 53.0, 452.0; 54.1, 341.0; 55.0, 1083.0; 56.0, 486.0; 57.0, 995.0; 58.0, 785.0; 59.1, 969.0; 60.0, 449.0; 60.9, 438.0; 62.0, 218.0; 63.0, 457.0; 63.9, 193.0; 65.1, 658.0; 66.0, 287.0; 67.0, 725.0; 68.0, 504.0; 69.0, 939.0; 70.0, 439.0; 70.9, 533.0; 73.1, 4455.0; 74.0, 540.0; 75.0, 1536.0; 76.0, 518.0; 77.0, 6116.0; 78.0, 1190.0; 79.0, 1319.0; 80.1, 382.0; 81.0, 1027.0; 82.0, 689.0; 83.1, 855.0; 84.0, 427.0; 85.0, 350.0; 86.9, 728.0; 88.0, 674.0; 89.0, 1665.0; 90.1, 363.0; 91.1, 2851.0; 92.0, 509.0; 93.1, 470.0; 94.0, 364.0; 95.1, 884.0; 96.0, 2460.0; 96.9, 846.0; 97.9, 238.0; 99.0, 199.0; 99.9, 153.0; 100.9, 437.0; 102.0, 609.0; 103.0, 2512.0; 103.9, 632.0; 105.1, 1611.0; 106.0, 936.0; 107.1, 1429.0; 108.0, 336.0; 109.1, 599.0; 110.0, 463.0; 111.0, 416.0; 111.9, 184.0; 113.0, 192.0; 114.0, 321.0; 115.0, 2342.0; 116.0, 580.0; 117.0, 1608.0; 118.0, 962.0; 119.1, 2489.0; 120.0, 790.0; 121.0, 1440.0; 122.0, 468.0; 123.1, 364.0; 124.1, 297.0; 125.1, 453.0; 126.0, 1530.0; 126.8, 645.0; 128.0, 395.0; 129.0, 703.0; 130.1, 338.0; 131.0, 1290.0; 132.0, 693.0; 133.0, 8166.0; 134.0, 2095.0; 135.0, 6316.0; 136.1, 1172.0; 137.1, 937.0; 138.0, 293.0; 139.1, 289.0; 140.0, 197.0; 141.0, 339.0; 142.1, 195.0; 143.1, 318.0; 144.1, 182.0; 145.1, 727.0; 147.1, 3312.0; 148.0, 2169.0; 149.1, 1969.0; 150.0, 627.0; 151.0, 3225.0; 152.0, 732.0; 153.0, 663.0; 154.0, 423.0; 155.1, 636.0; 155.8, 631.0; 157.1, 333.0; 158.0, 377.0; 159.1, 485.0; 160.0, 568.0; 161.0, 2950.0; 162.0, 769.0; 163.0, 2696.0; 164.1, 719.0; 165.1, 1404.0; 166.0, 609.0; 167.0, 572.0; 168.1, 279.0; 169.1, 323.0; 169.9, 175.0; 170.8, 309.0; 172.1, 170.0; 173.0, 307.0; 174.1, 261.0; 175.0, 940.0; 176.0, 2463.0; 177.0, 6101.0; 178.0, 1430.0; 179.0, 2871.0; 180.0, 635.0; 181.0, 3429.0; 182.0, 502.0; 182.9, 191.0; 184.0, 163.0; 185.0, 265.0; 186.2, 261.0; 186.8, 308.0; 188.1, 222.0; 189.0, 624.0; 191.0, 8192.0; 192.0, 2035.0; 193.0, 5878.0; 194.0, 2010.0; 195.0, 1866.0; 196.0, 319.0; 197.0, 1003.0; 198.1, 347.0; 199.0, 273.0; 199.8, 207.0; 201.1, 276.0; 203.0, 1648.0; 204.0, 495.0; 205.0, 1426.0; 207.0, 33968.0; 208.0, 7556.0; 209.0, 5657.0; 210.0, 814.0; 211.0, 584.0; 212.0, 227.0; 213.0, 290.0; 215.0, 190.0; 216.1, 231.0; 217.1, 285.0; 217.9, 369.0; 218.9, 410.0; 220.0, 257.0; 221.0, 739.0; 223.1, 4025.0; 224.0, 758.0; 224.9, 553.0; 226.0, 164.0; 227.9, 195.0; 230.9, 153.0; 232.0, 269.0; 233.0, 1001.0; 234.0, 856.0; 235.0, 3033.0; 236.0, 896.0; 237.0, 1462.0; 238.1, 472.0; 239.0, 697.0; 240.0, 296.0; 241.1, 326.0; 241.9, 272.0; 243.0, 226.0; 248.1, 266.0; 249.0, 1679.0; 250.0, 801.0; 251.0, 2955.0; 252.1, 886.0; 253.0, 5393.0; 254.0, 1688.0; 255.0, 1471.0; 256.1, 335.0; 257.0, 374.0; 261.9, 245.0; 263.0, 412.0; 264.0, 302.0; 265.0, 1202.0; 266.0, 443.0; 267.0, 6036.0; 268.0, 1898.0; 269.0, 1983.0; 270.0, 688.0; 271.0, 376.0; 273.0, 203.0; 275.0, 204.0; 276.0, 187.0; 277.1, 415.0; 278.1, 237.0; 279.0, 836.0; 281.1, 8336.0; 282.0, 2365.0; 283.0, 2338.0; 284.1, 623.0; 285.0, 1276.0; 286.2, 392.0; 292.0, 192.0; 293.0, 814.0; 294.0, 647.0; 295.1, 1820.0; 296.1, 1553.0; 297.1, 1190.0; 298.0, 377.0; 299.1, 438.0; 300.2, 212.0; 301.1, 586.0; 302.1, 251.0; 305.0, 178.0; 307.1, 354.0; 308.0, 676.0; 309.0, 2987.0; 310.1, 886.0; 311.1, 2875.0; 312.1, 980.0; 313.1, 736.0; 314.1, 202.0; 315.1, 773.0; 316.1, 2902.0; 317.1, 650.0; 318.1, 165.0; 320.1, 259.0; 321.1, 314.0; 322.0, 320.0; 323.0, 905.0; 324.0, 564.0; 325.0, 3673.0; 326.1, 7722.0; 327.1, 4268.0; 328.1, 1561.0; 328.9, 1260.0; 330.0, 442.0; 331.0, 1959.0; 332.1, 674.0; 333.1, 478.0; 334.8, 247.0; 335.9, 153.0; 337.2, 163.0; 338.1, 354.0; 339.1, 411.0; 339.8, 154.0; 341.0, 3742.0; 342.2, 2481.0; 343.0, 1371.0; 344.0, 463.0; 344.9, 229.0; 346.0, 1136.0; 347.0, 372.0; 348.0, 210.0; 349.1, 230.0; 350.1, 1420.0; 351.1, 2843.0; 352.1, 1109.0; 353.1, 966.0; 354.0, 350.0; 355.1, 2055.0; 356.1, 943.0; 357.2, 5329.0; 358.2, 1520.0; 359.1, 237.0; 360.1, 159.0; 367.2, 154.0; 368.1, 204.0; 368.8, 359.0; 370.2, 939.0; 371.1, 787.0; 372.1, 225.0; 372.9, 250.0; 374.1, 174.0; 377.0, 245.0; 382.2, 310.0; 383.0, 794.0; 384.1, 446.0; 385.0, 847.0; 386.0, 372.0; 387.0, 409.0; 389.0, 375.0; 389.8, 166.0; 396.1, 192.0; 397.1, 621.0; 398.0, 337.0; 399.1, 513.0; 400.2, 10769.0; 401.2, 3377.0; 402.2, 808.0; 403.0, 724.0; 404.1, 269.0; 405.0, 929.0; 406.1, 418.0; 407.2, 233.0; 413.2, 307.0; 415.0, 827.0; 416.0, 382.0; 417.0, 388.0; 417.9, 160.0; 423.3, 168.0; 424.0, 799.0; 425.1, 1640.0; 426.2, 644.0; 427.1, 547.0; 428.0, 187.0; 429.0, 661.0; 430.2, 242.0; 431.0, 283.0; 432.1, 150.0; 445.1, 330.0; 447.0, 182.0; 451.1, 150.0; 457.0, 181.0; 459.0, 175.0; 461.0, 261.0; 474.9, 181.0; 477.0, 175.0; 479.1, 166.0; 487.1, 224.0; 498.1, 276.0; 499.1, 581.0; 500.2, 294.0; 501.0, 172.0 |
